# Supplementary material
Source: PubMed Central journal article supplement (PMC5752149)

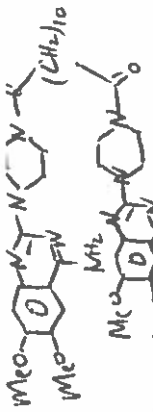

07222014 1 1 C:\Bruker\TopSpin3.2\bozhong\07222014

BW27/690mg

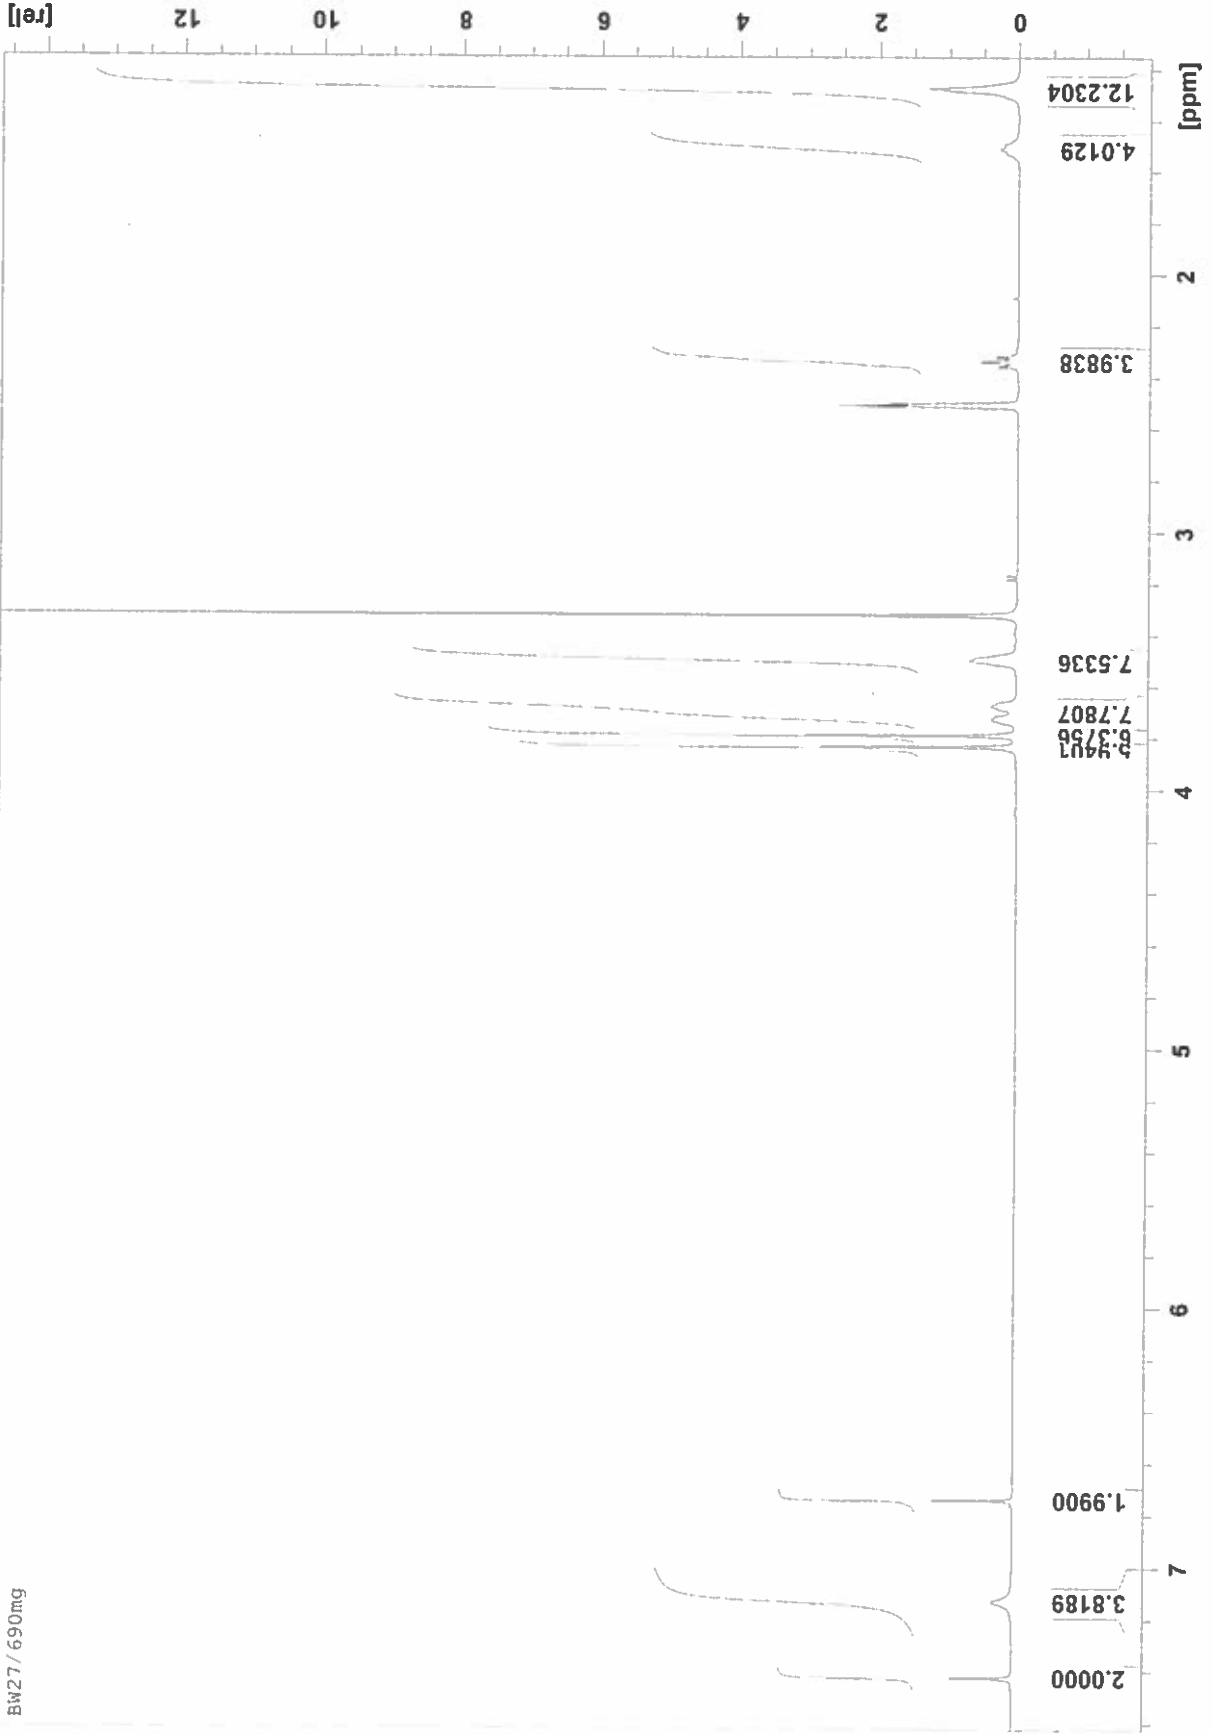

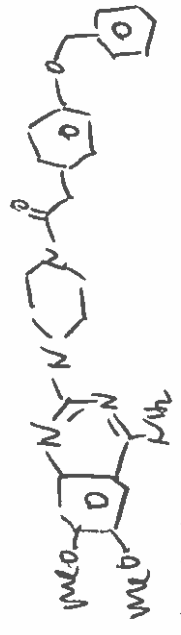

BWZb

01062014-benzyloxyphenyl 3 1 C:\Bruker\TopSpin3.2\zhongbo\01062014

Bw-benzyloxyphenyl

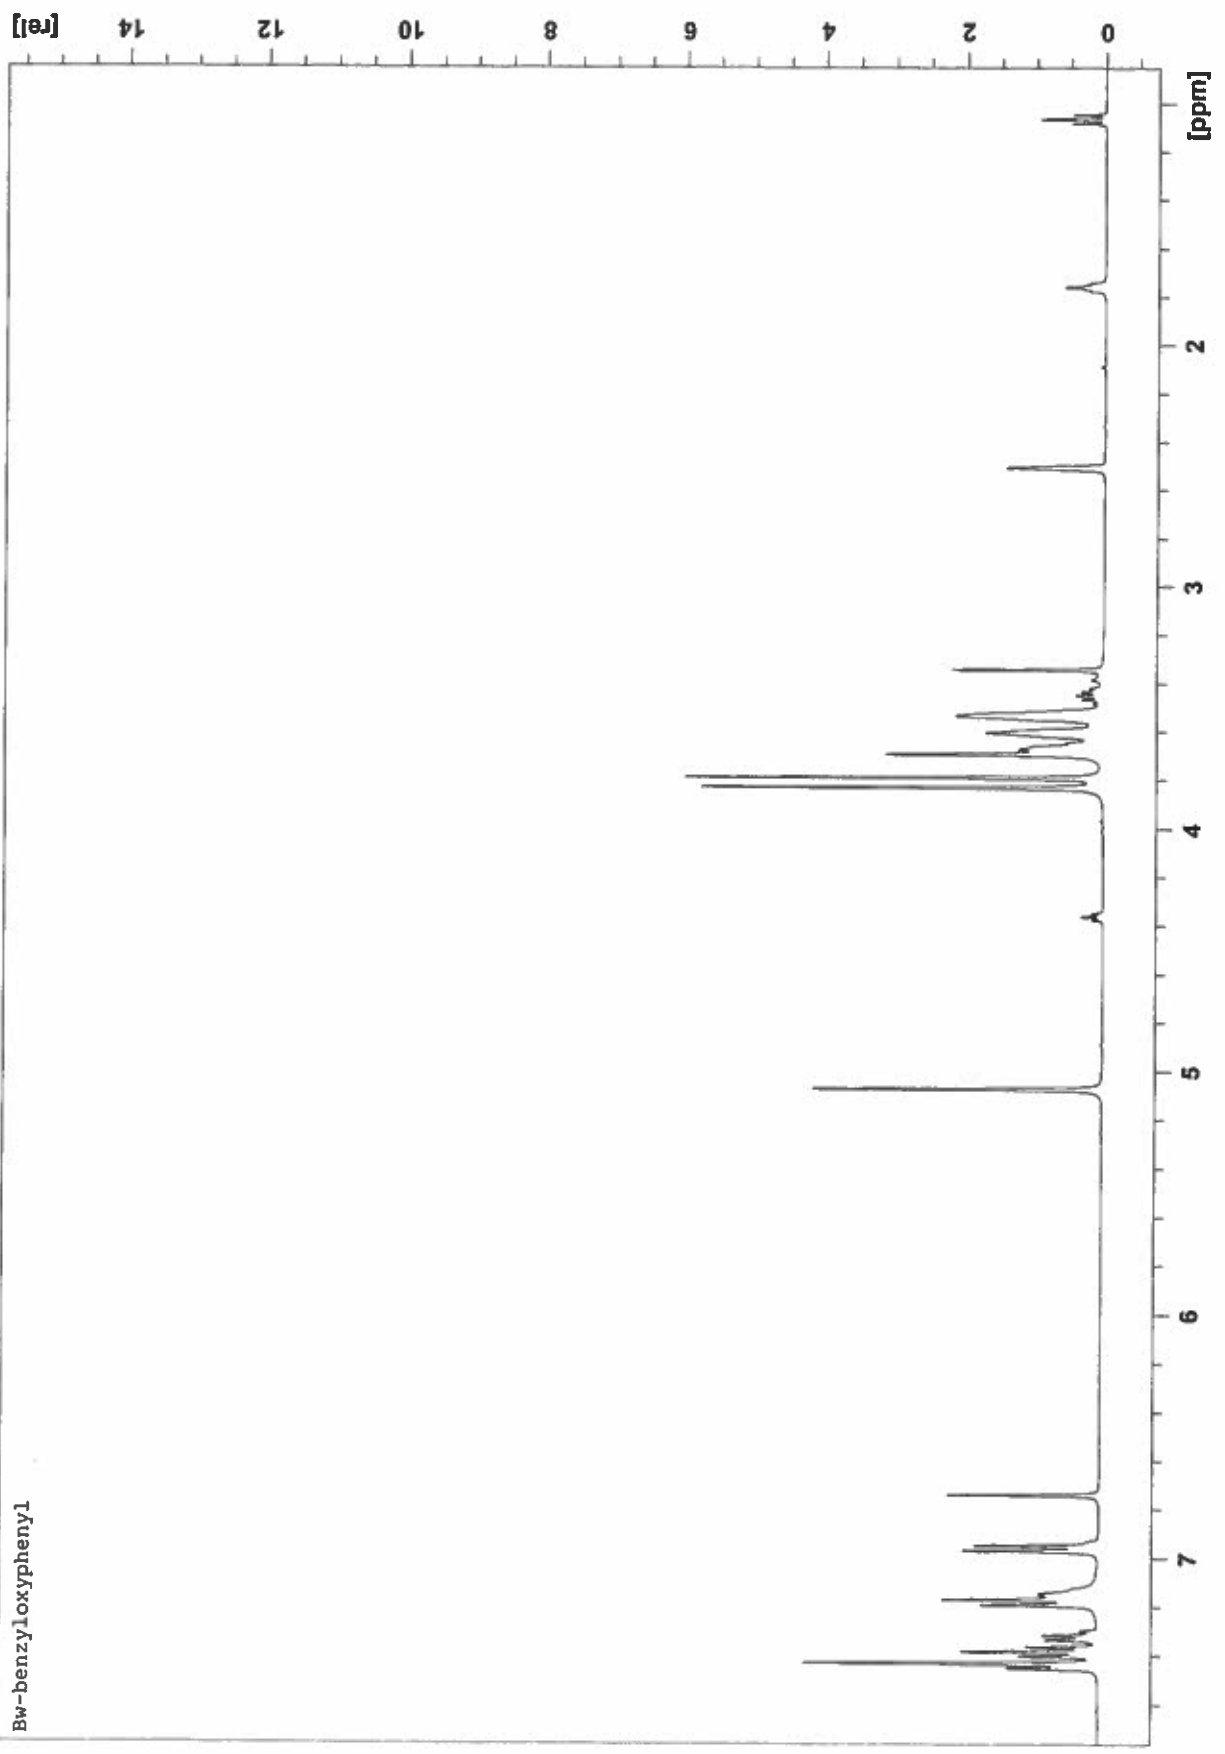

07112013 20 1 C:\Bruker\TopSpin3.2\zhongbo\07112013

BW1

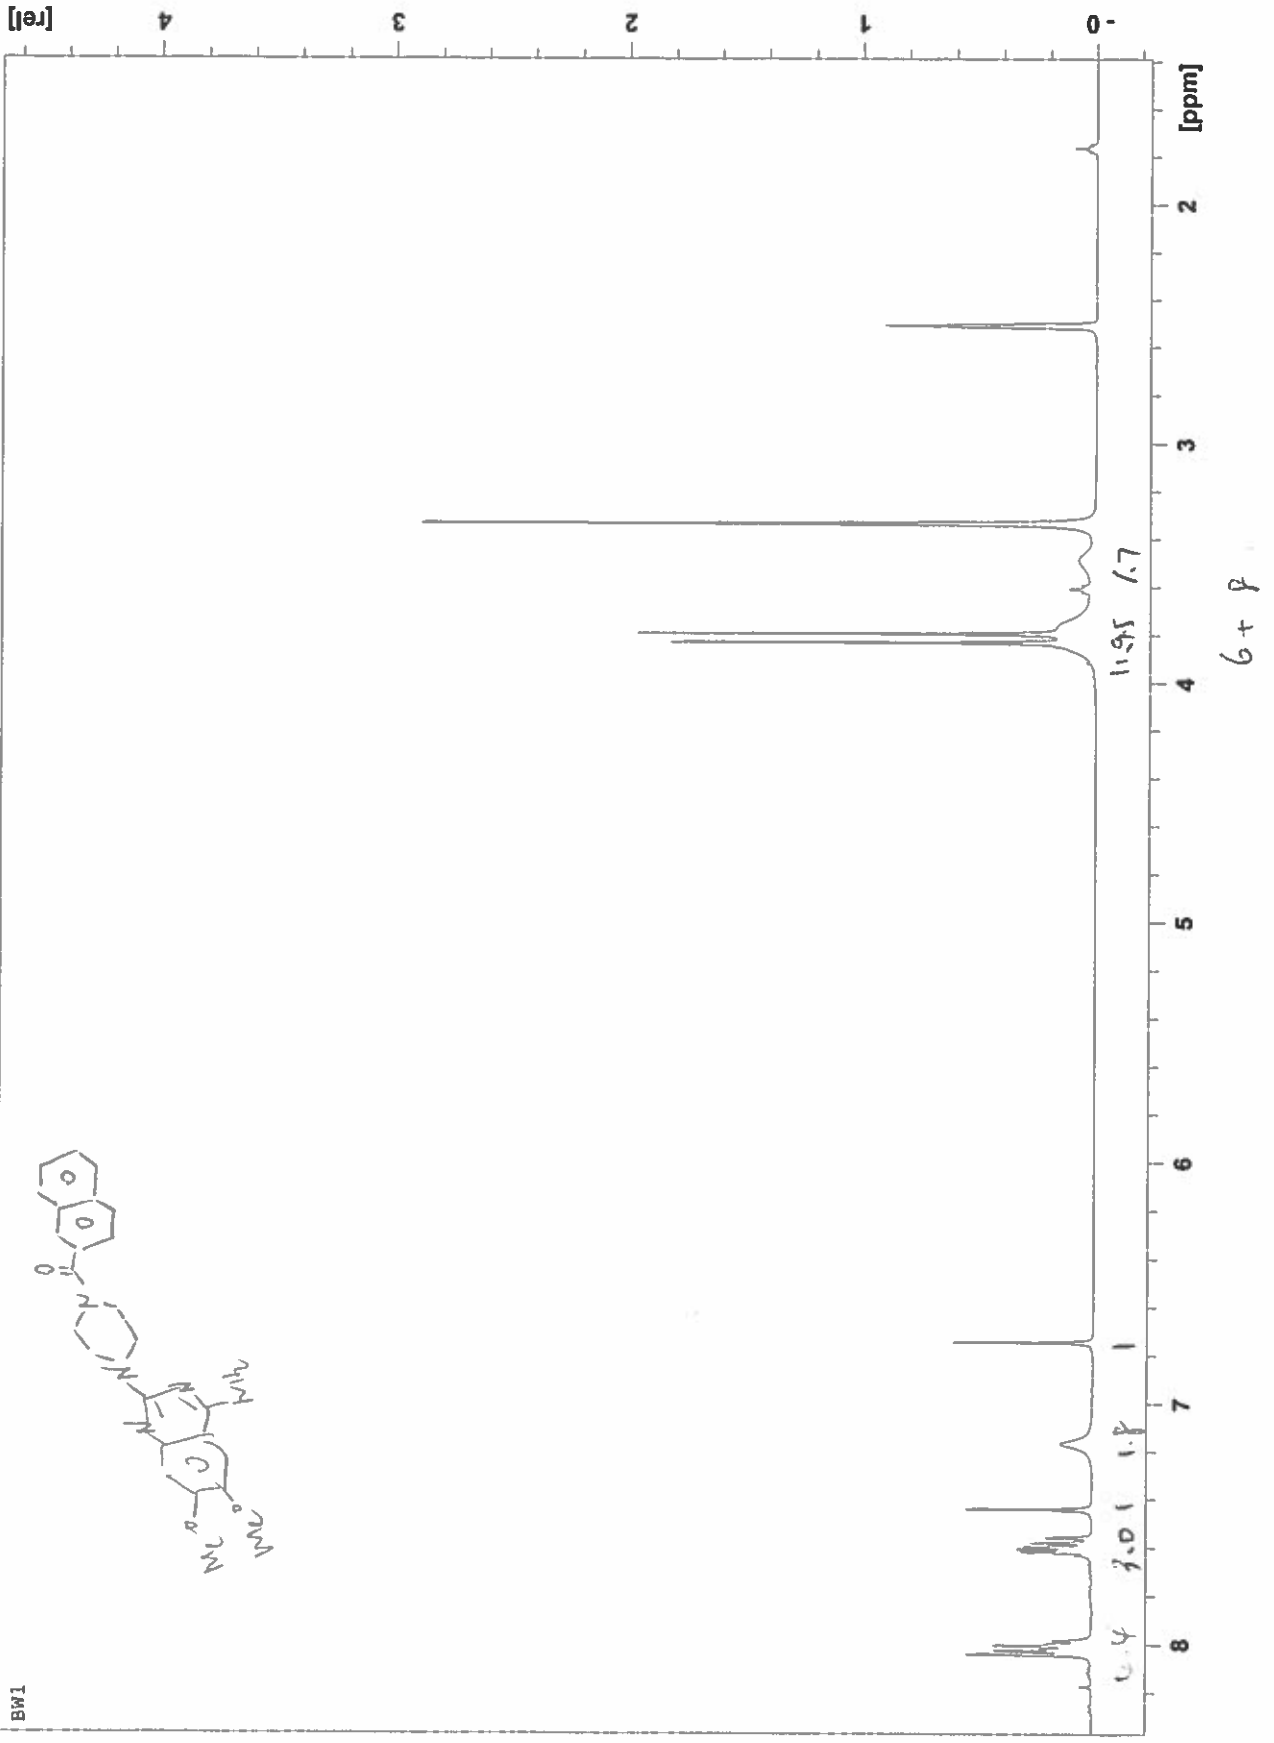

07112013 21  $\mu$  C:\Bruker\TopSpin3.2\zhongbo\07112013

BW2

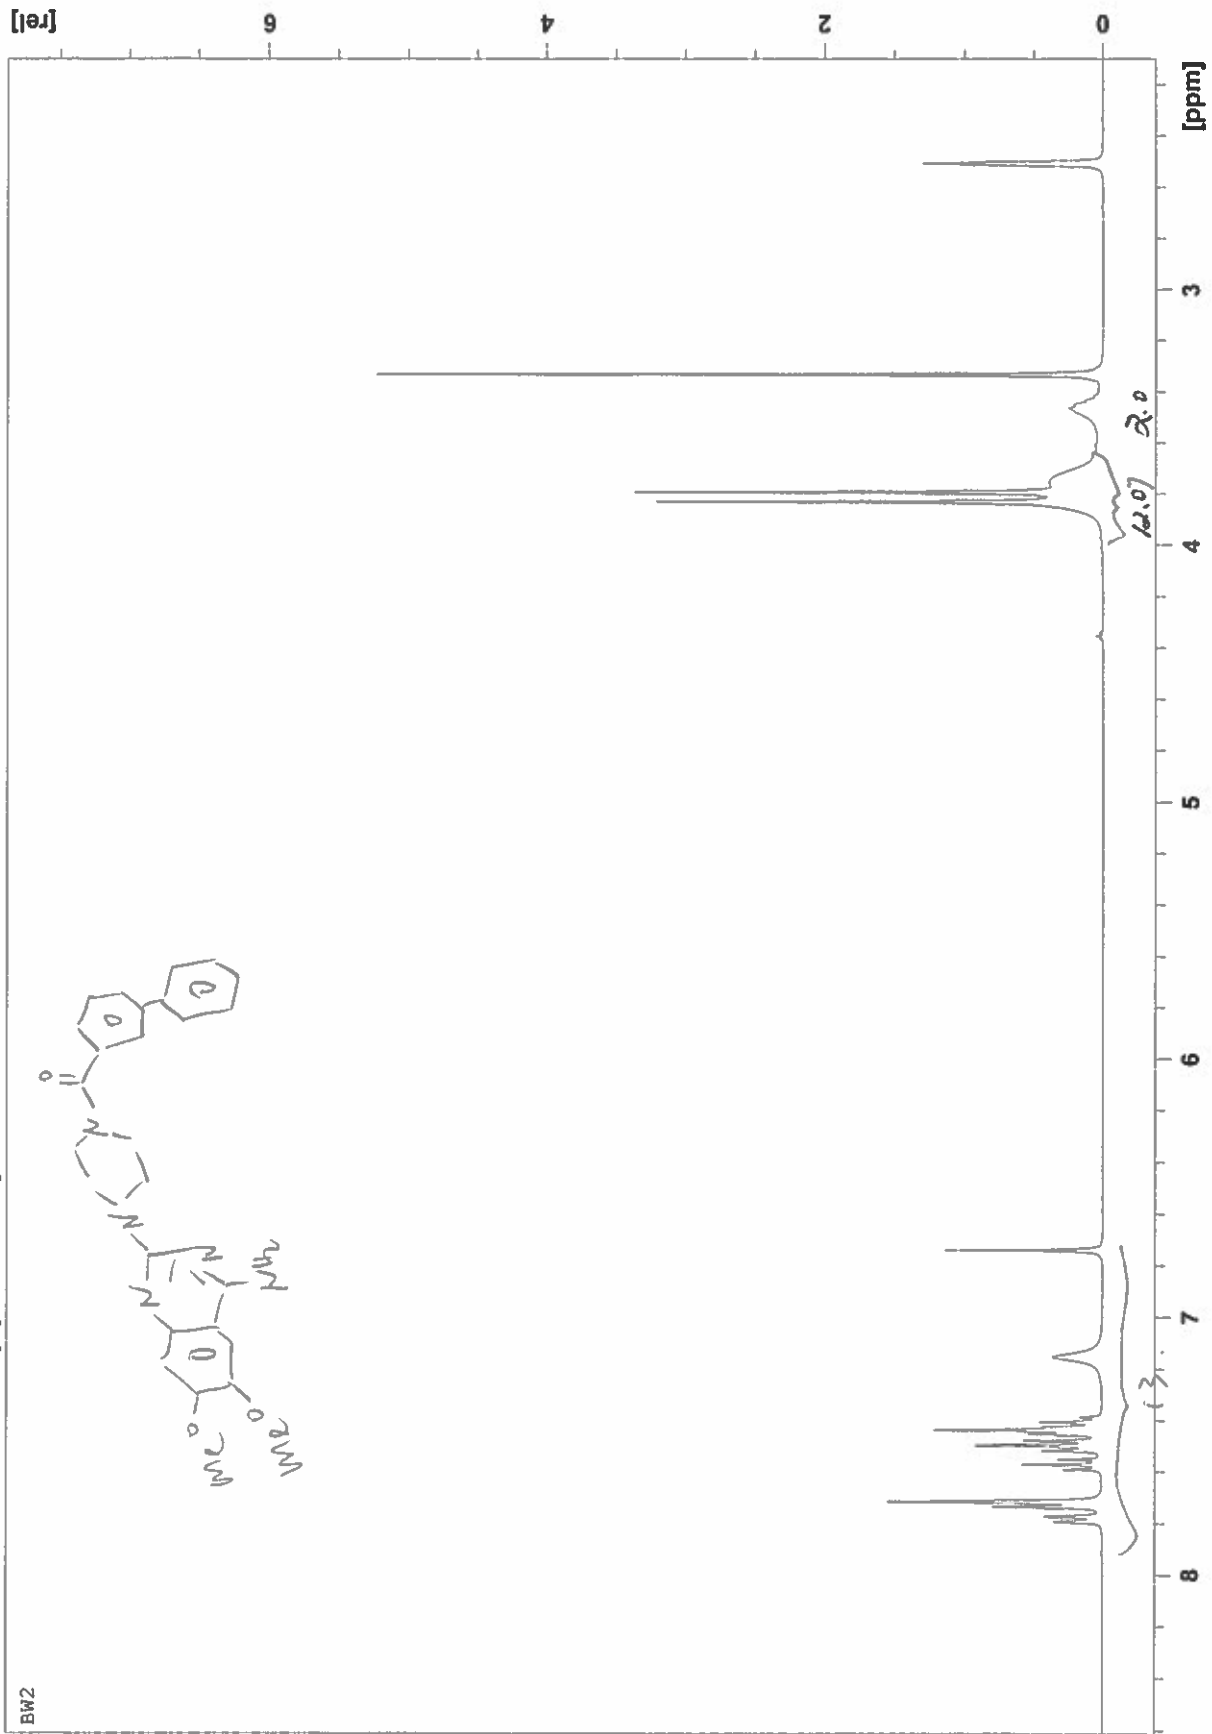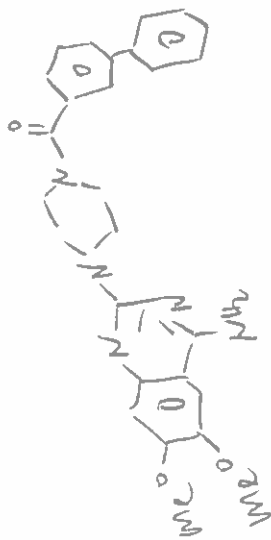

07112013 3 1 C:\Bruker\TopSpin3.2\zhongbo\07112013

BW3

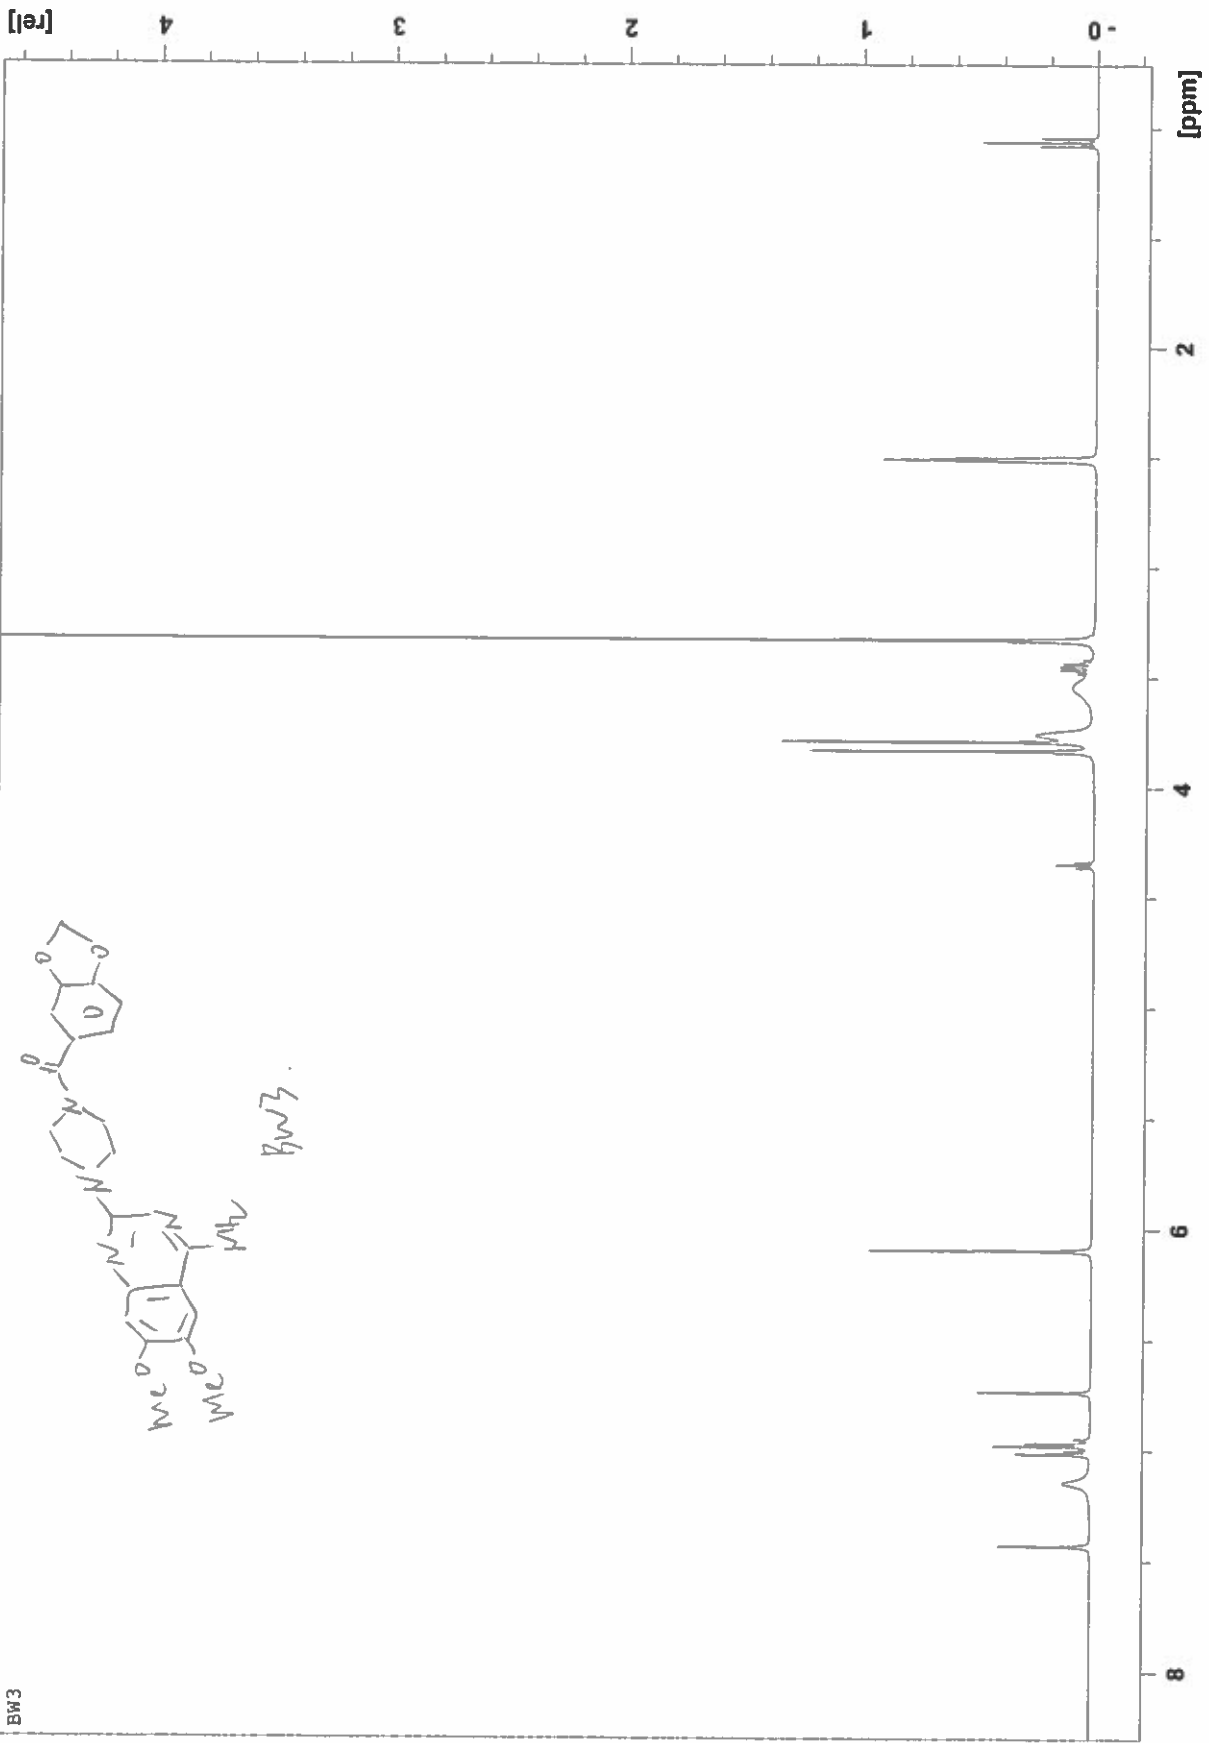



Yes.

07112013 16 1 C:\Bruker\TopSpin3.2\zhongbo\07112013

BW16

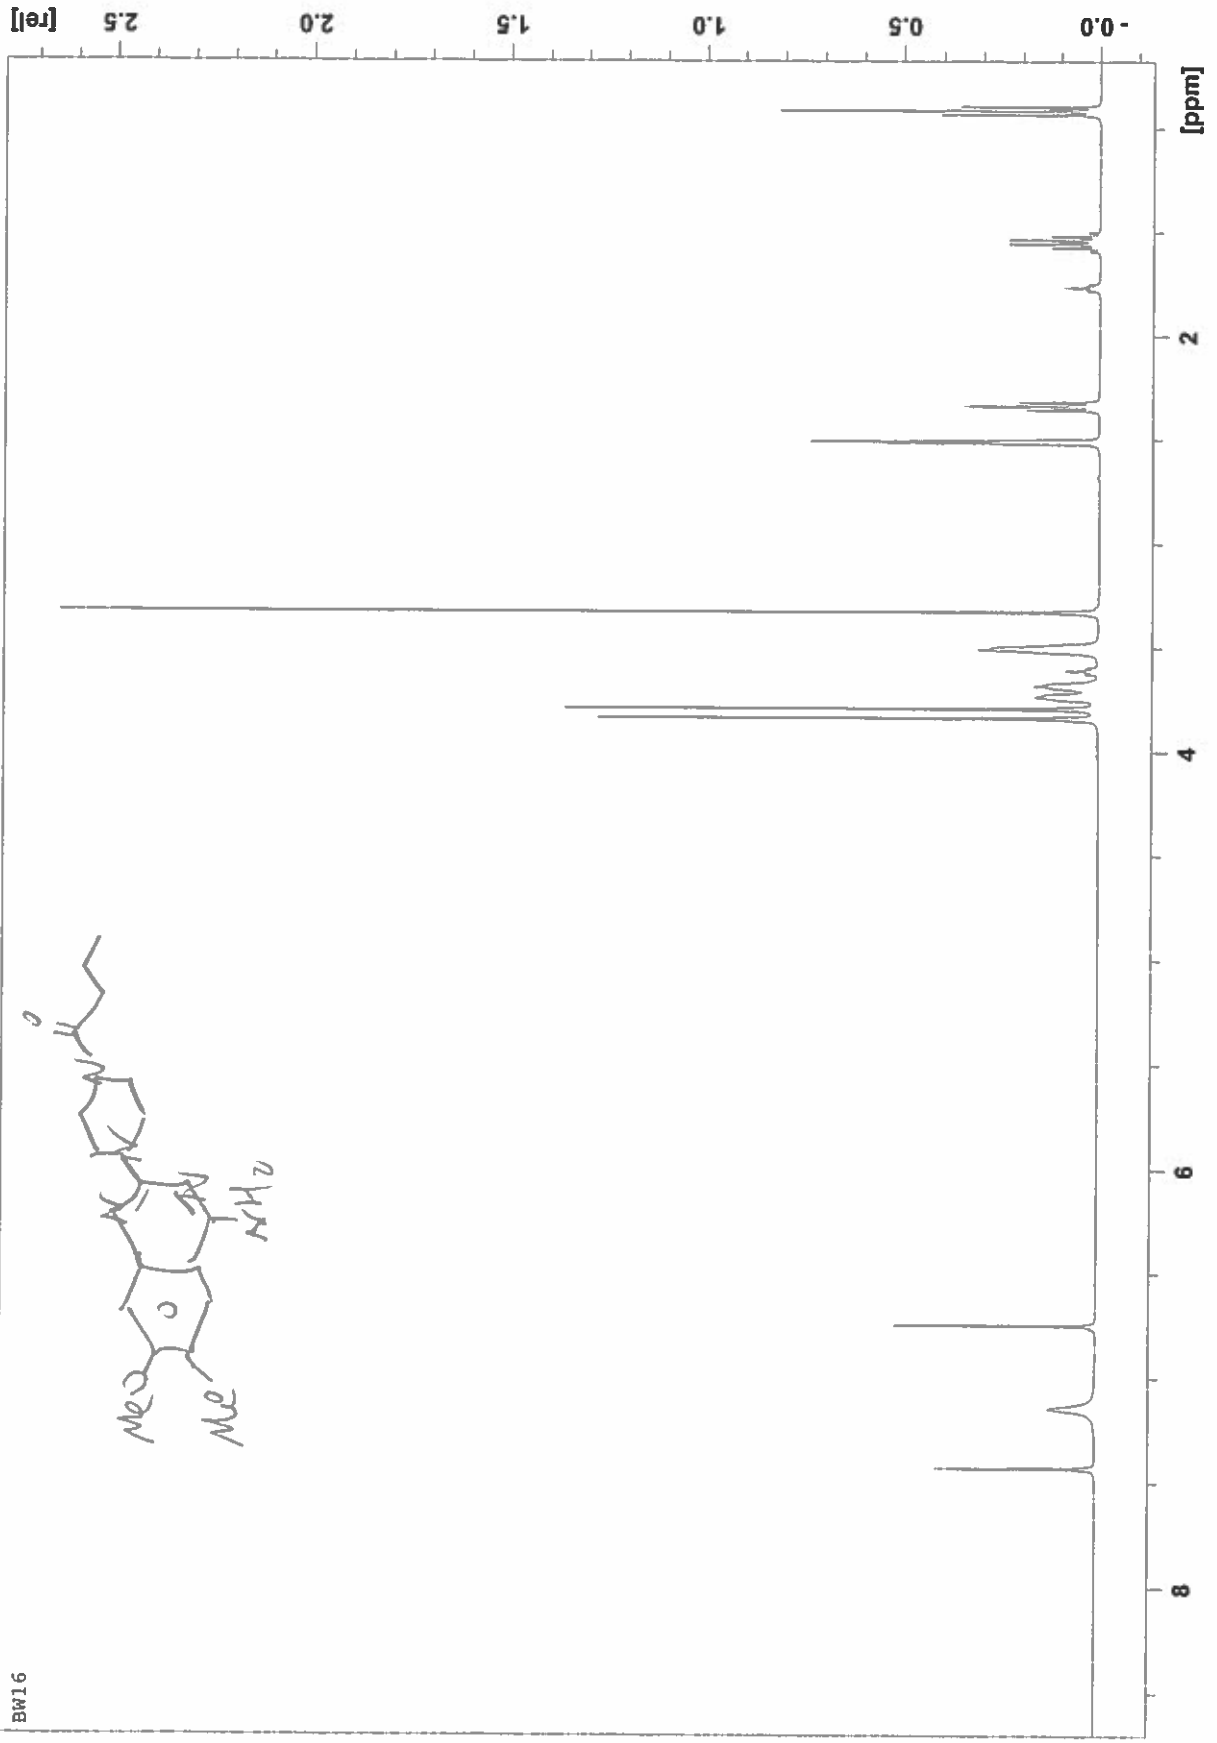

ves

07112013 17 1 C:\Bruker\TopSpin3.2\zhongbo\07112013\_0

BW17

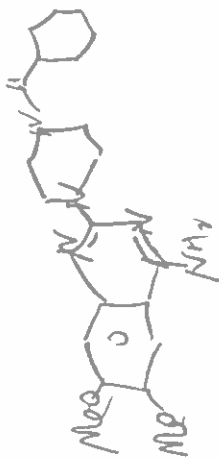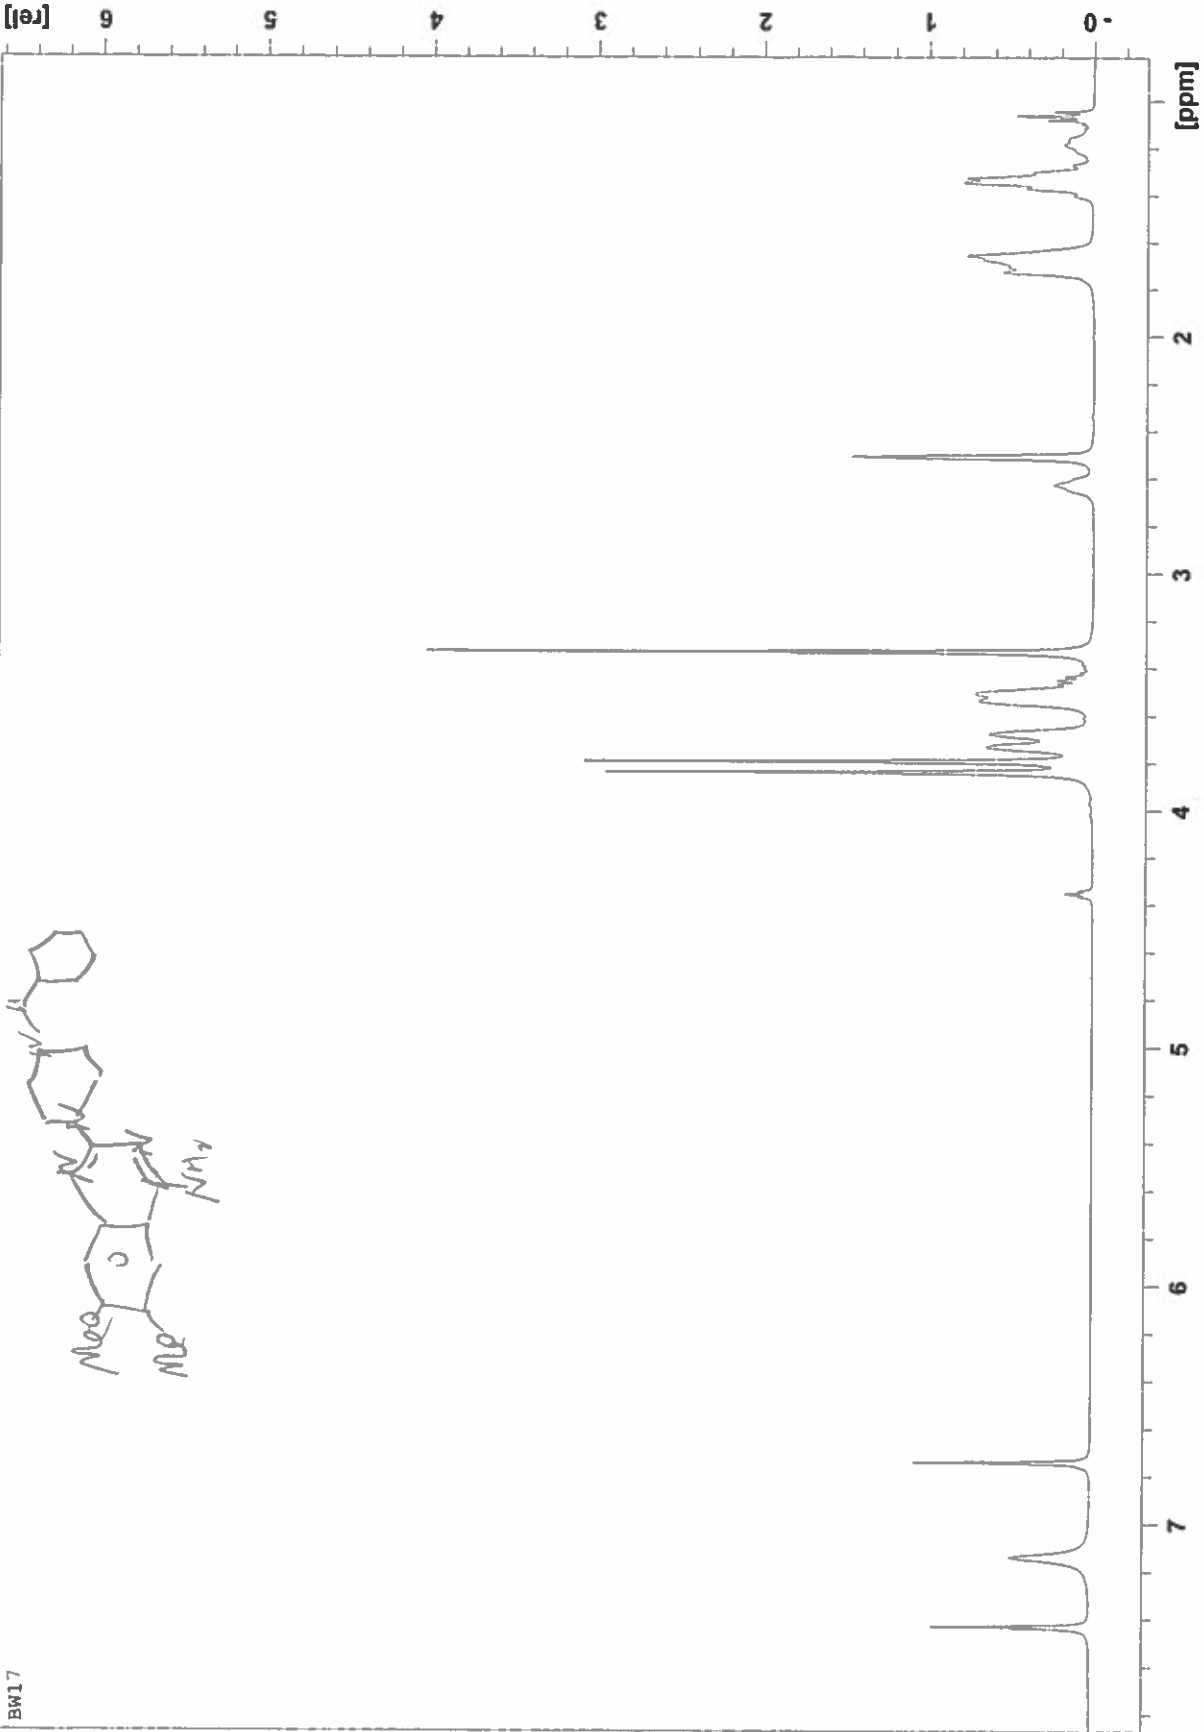



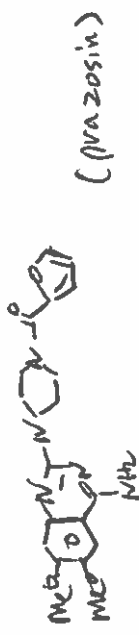

01202015 1 1 C:\Bruker\TopSpin3.2\bozhong\01202015

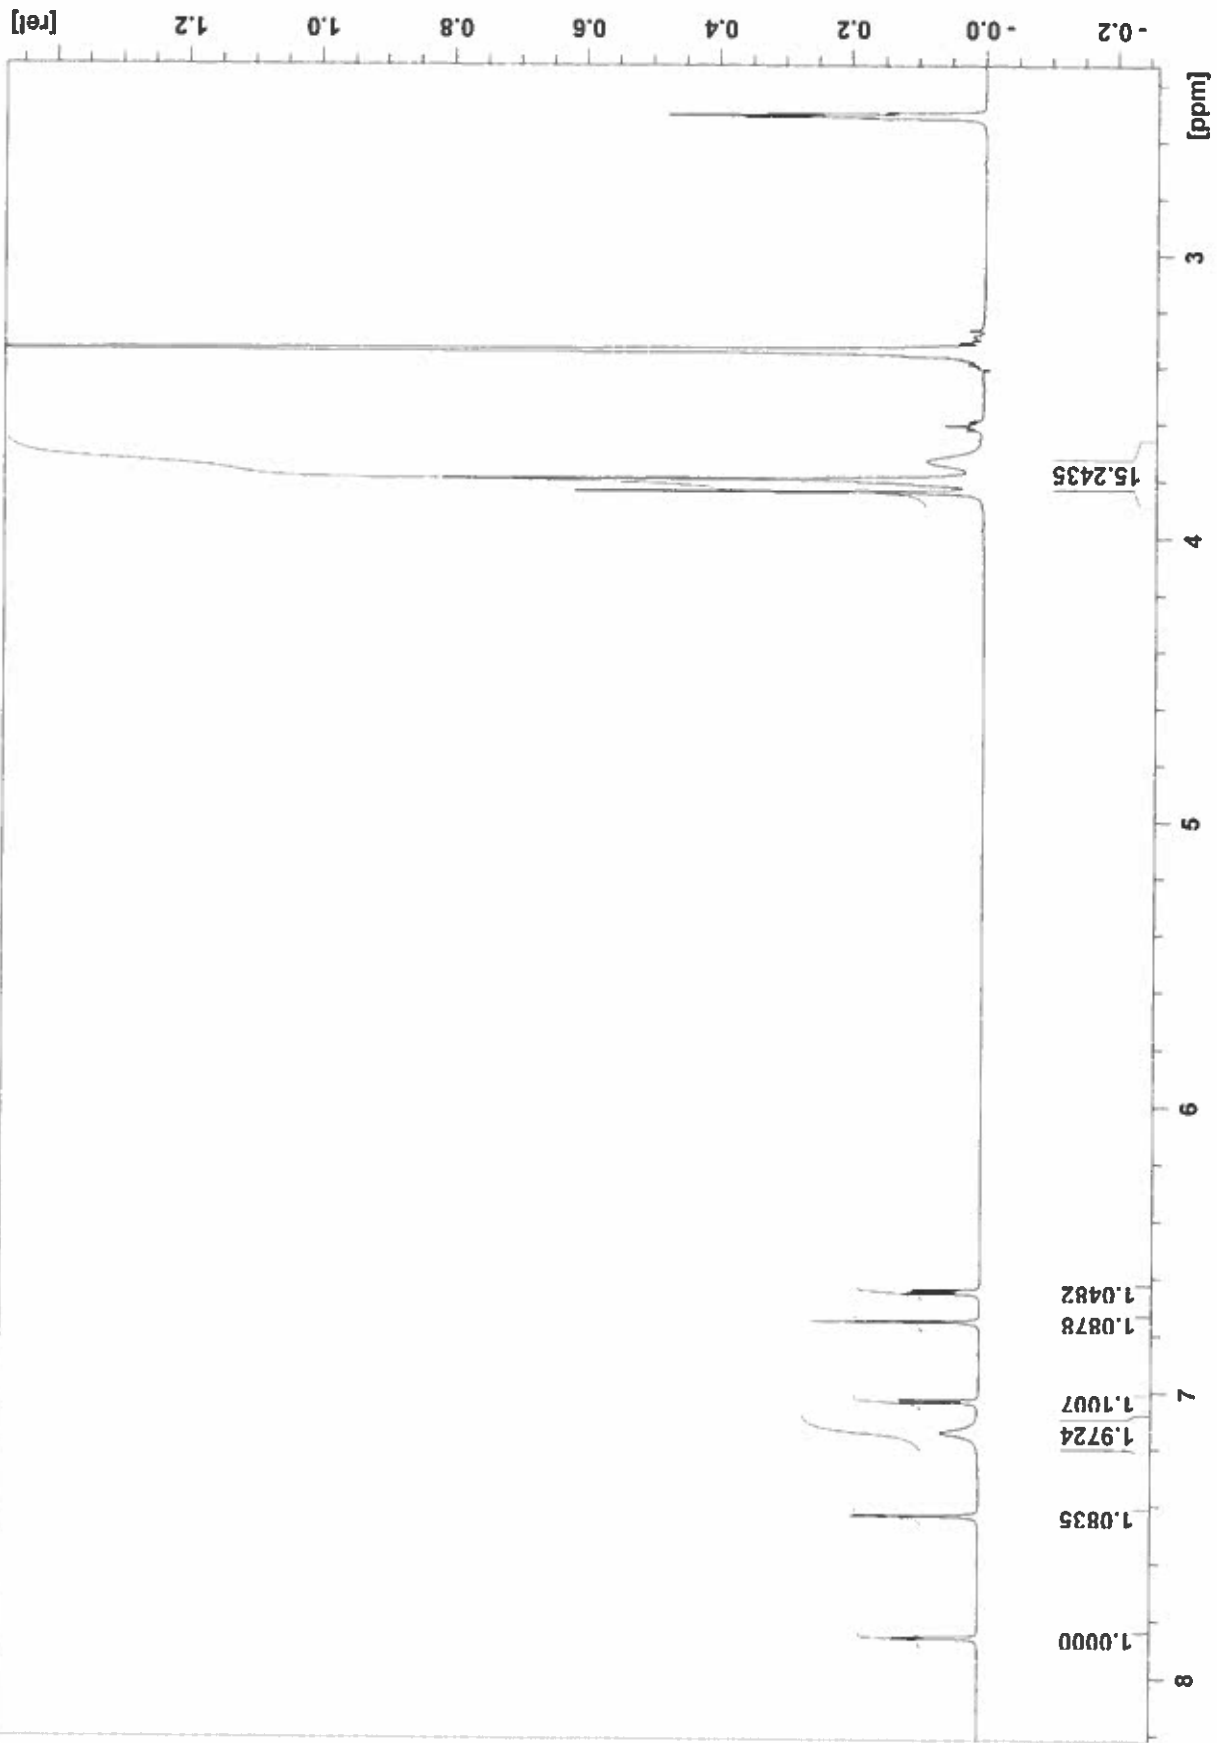

07112013 18 1 C:\Bruker\TopSpin3.2\zhongbo\07112013

BW18

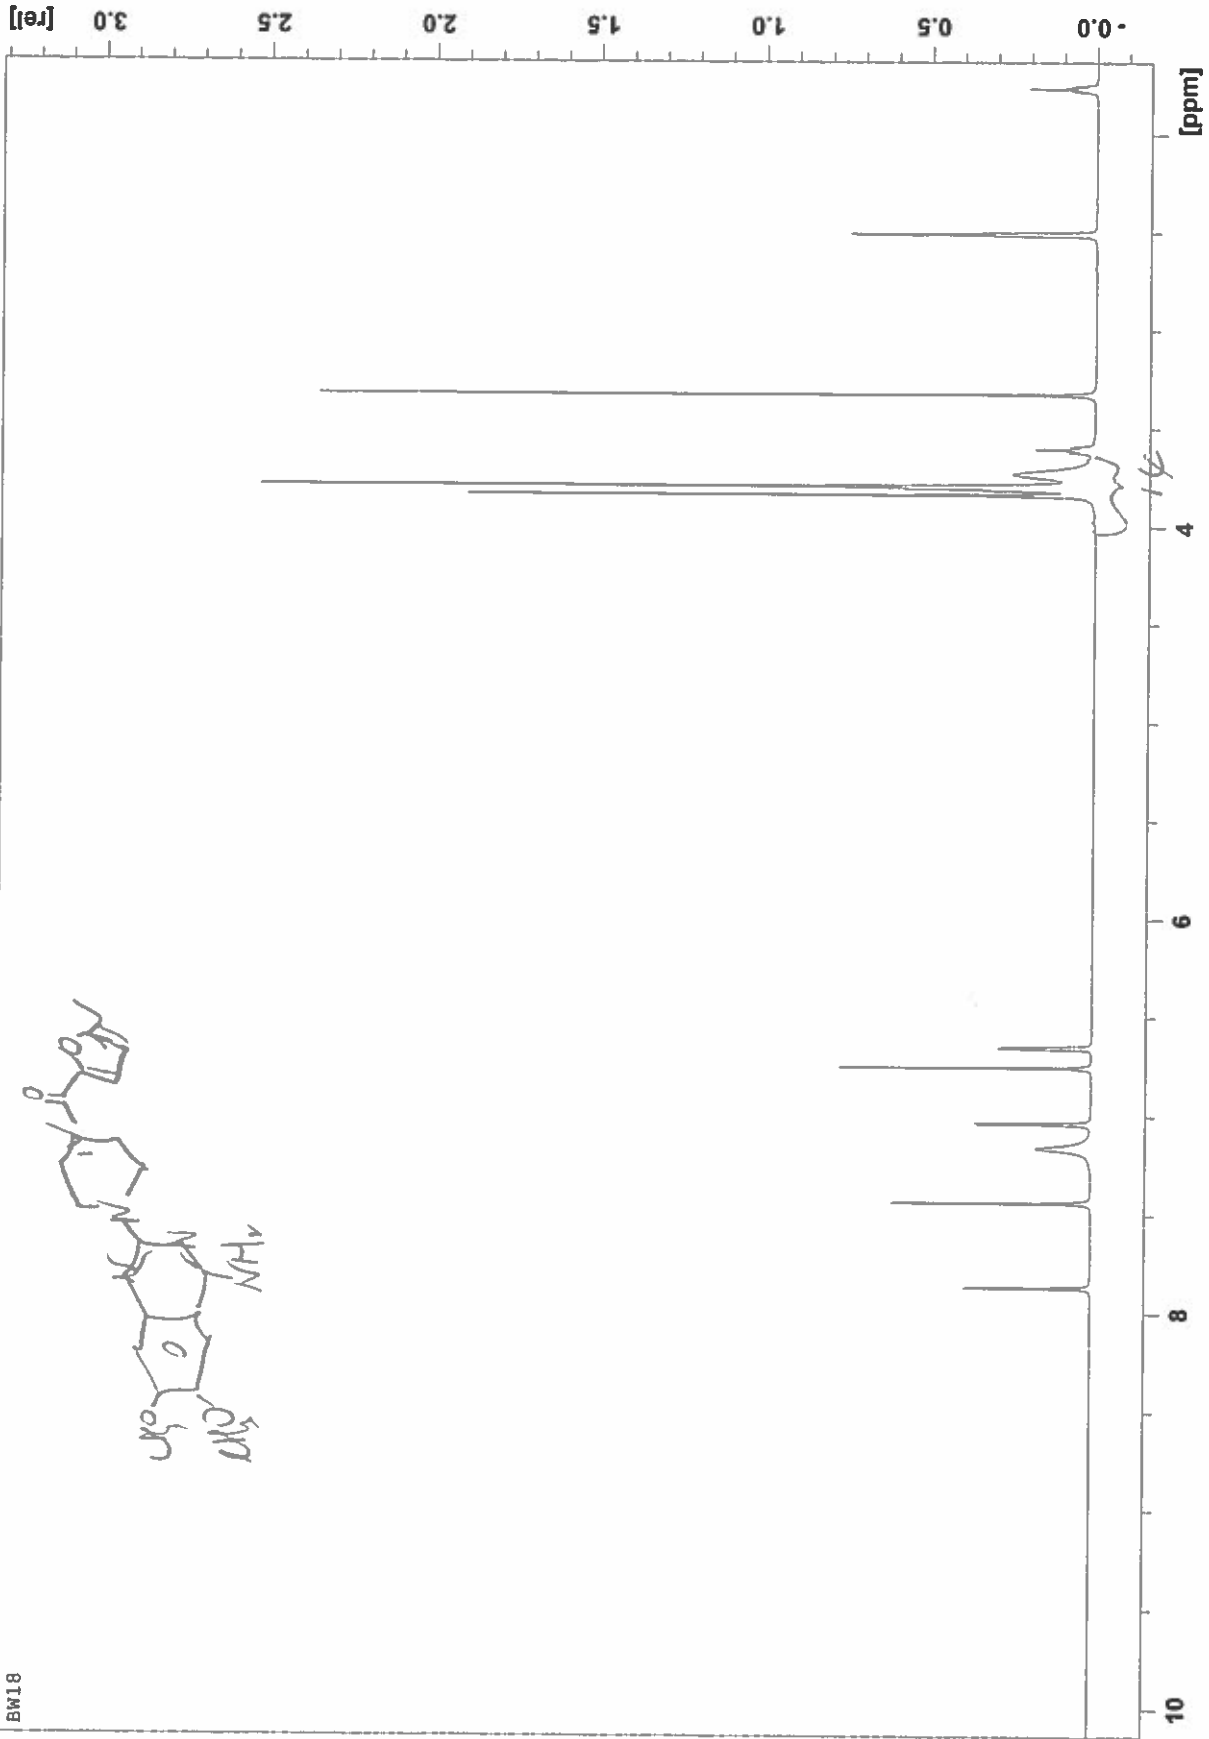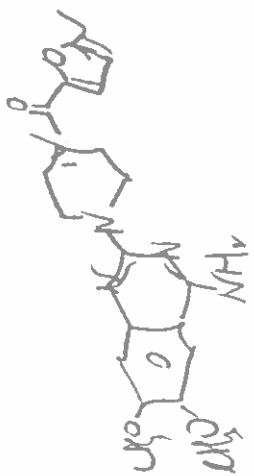

15.119d

127

07112013 19 1 C:\Bruker\TopSpin3.2\zhongbo\07112013

BW19

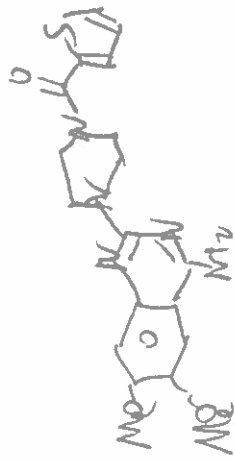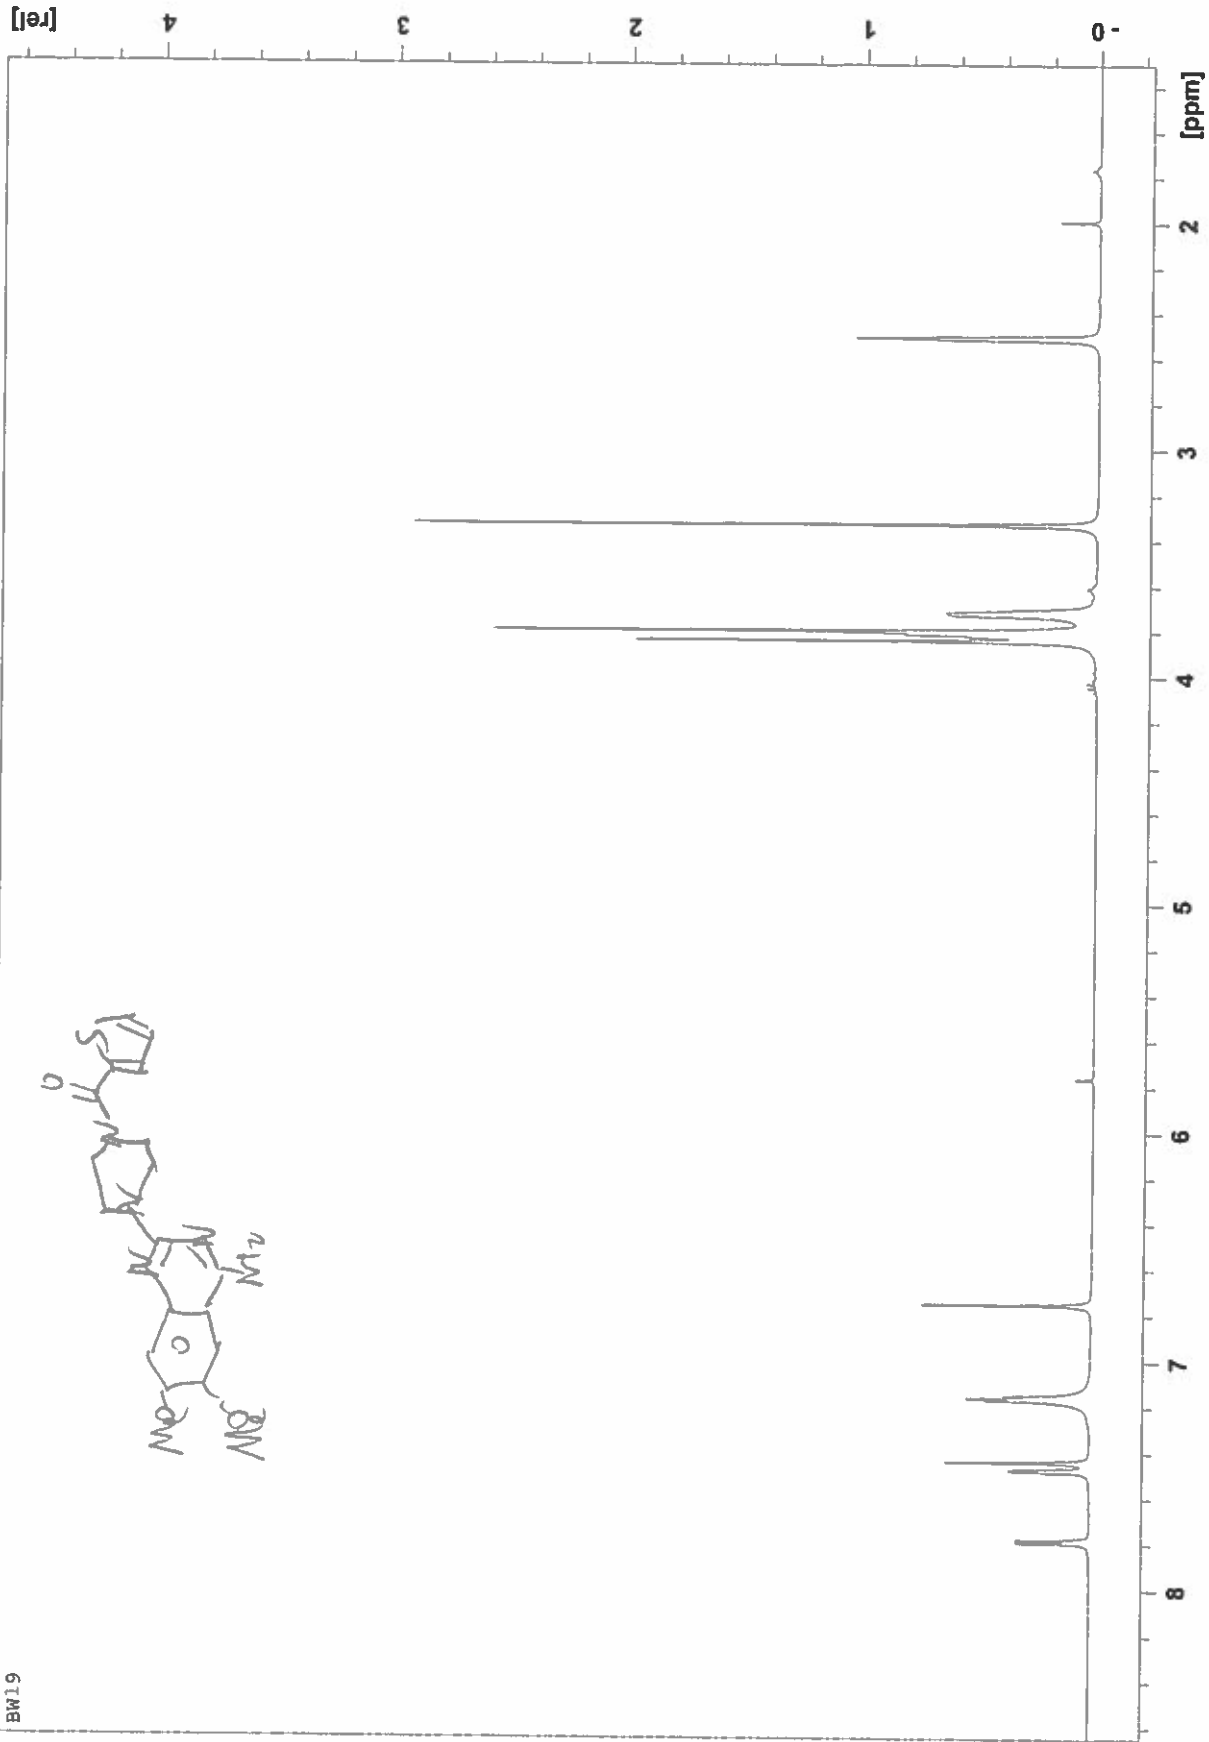

06122013 2 1 C:\Bruker\TopSpin3.2\zhongbo\06122013

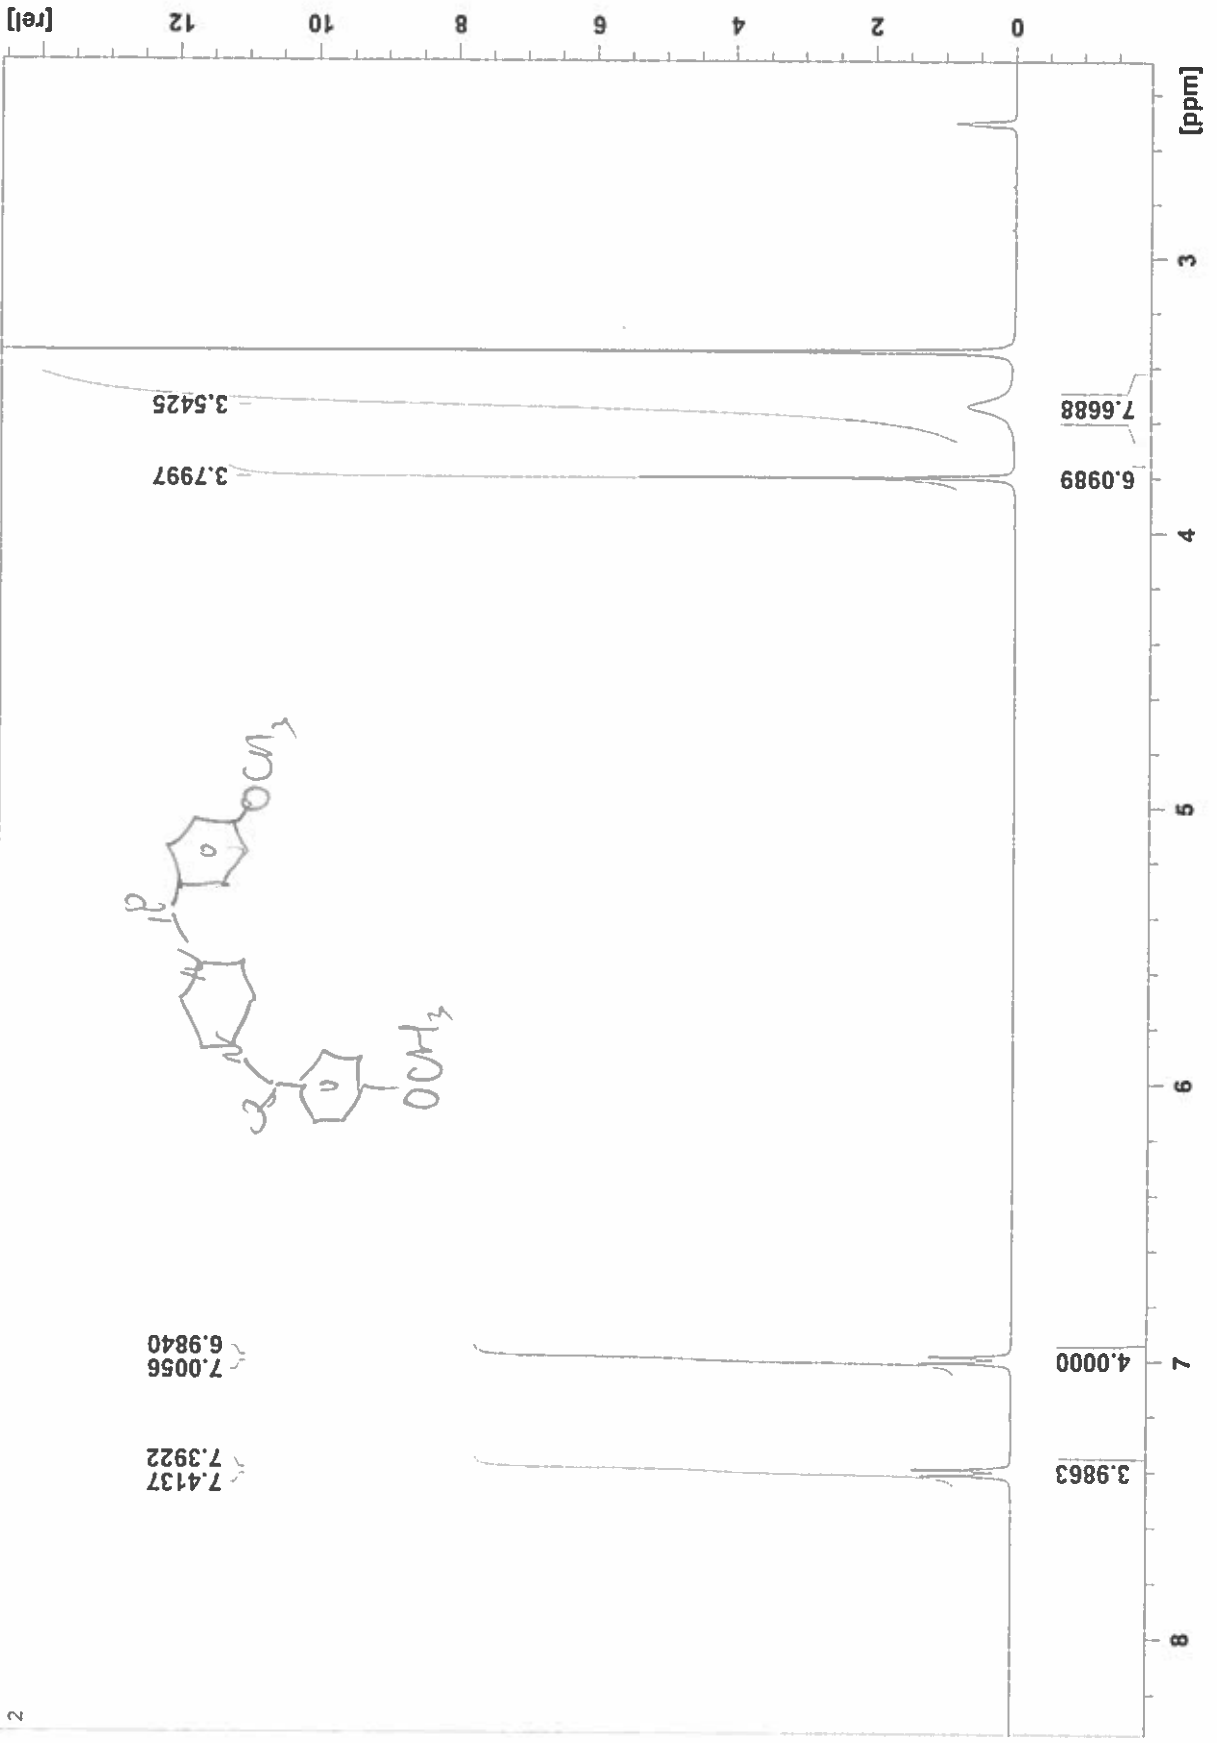

2

06122013 1 1 C:\Bruker\TopSpin3.2\zhongbo\06122013

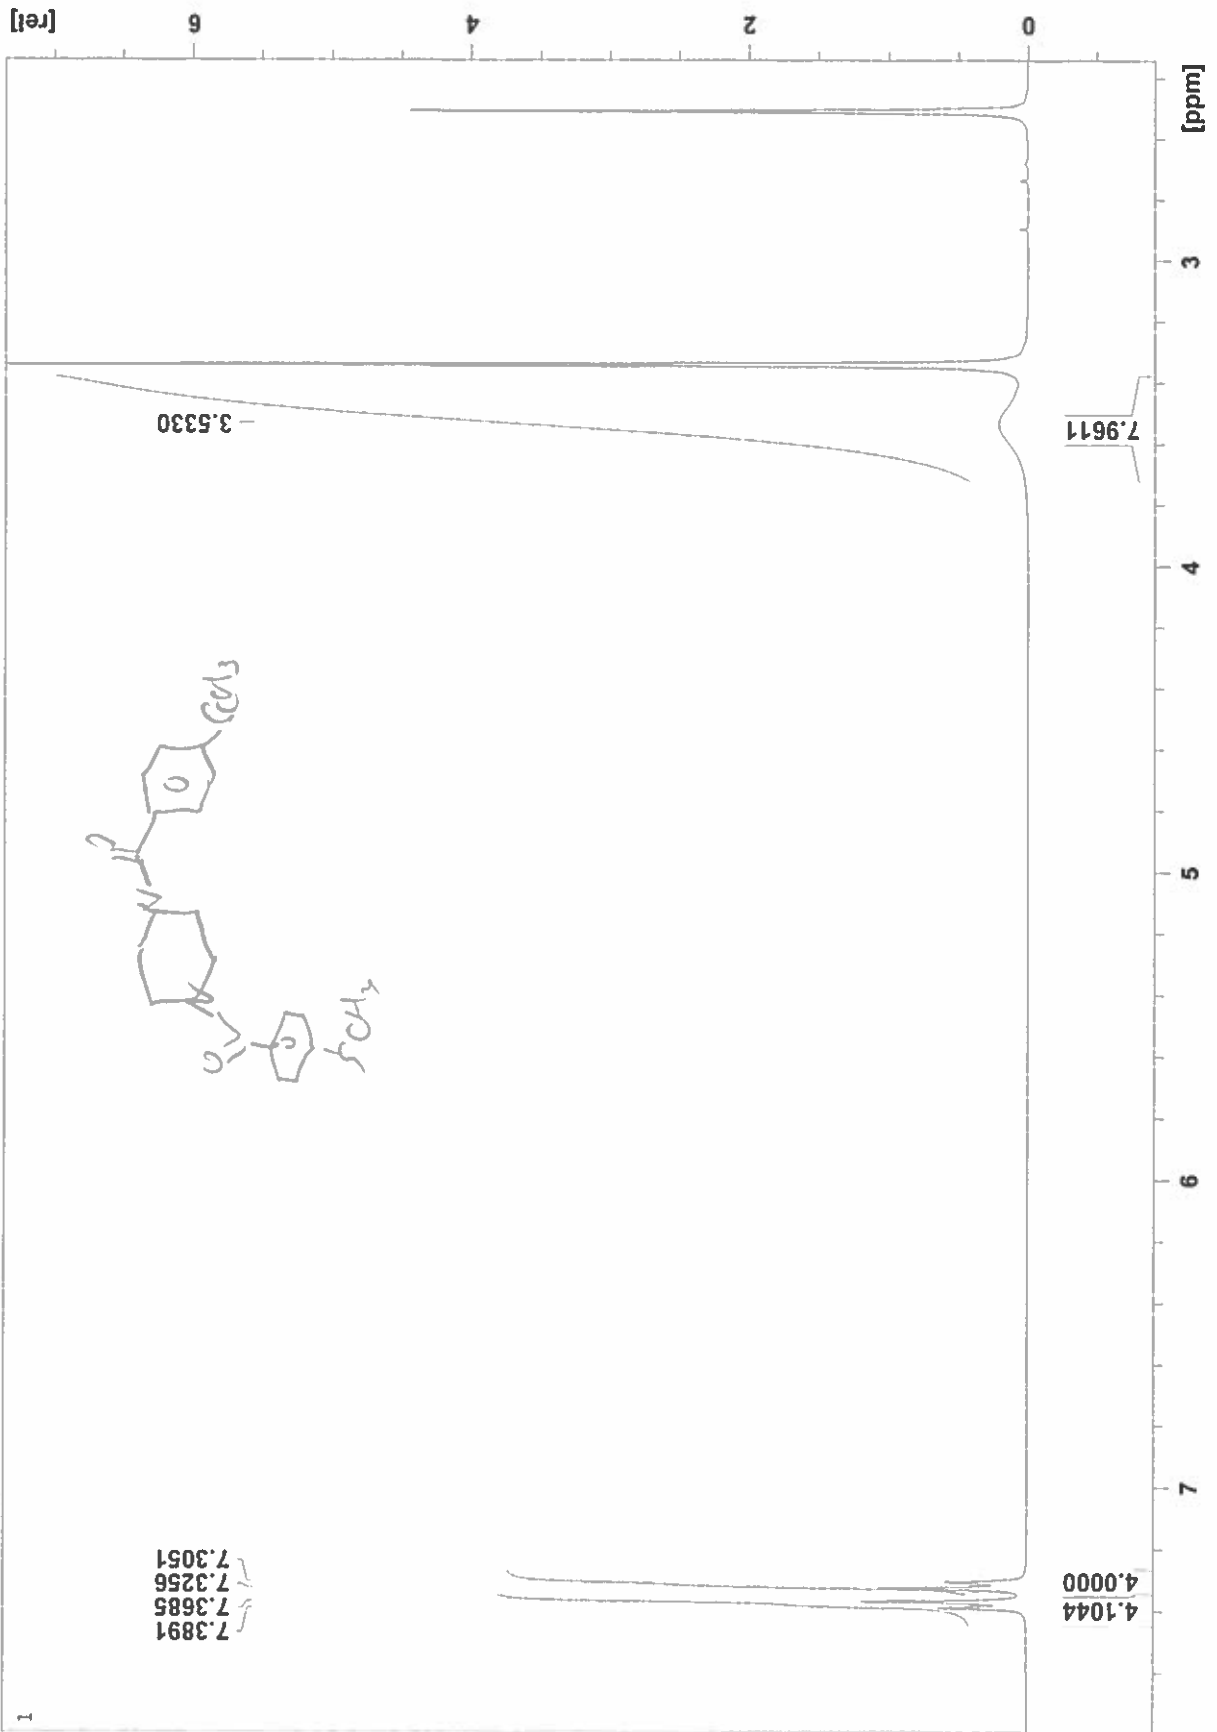

[rel]

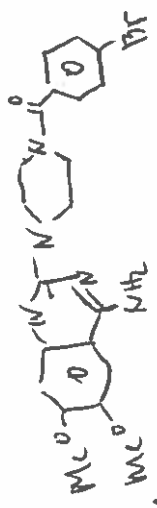

BW22

01062014-Br 2 1 C:\Bruker\TopSpin3.2\zhongbo\01062014

Bw-Br

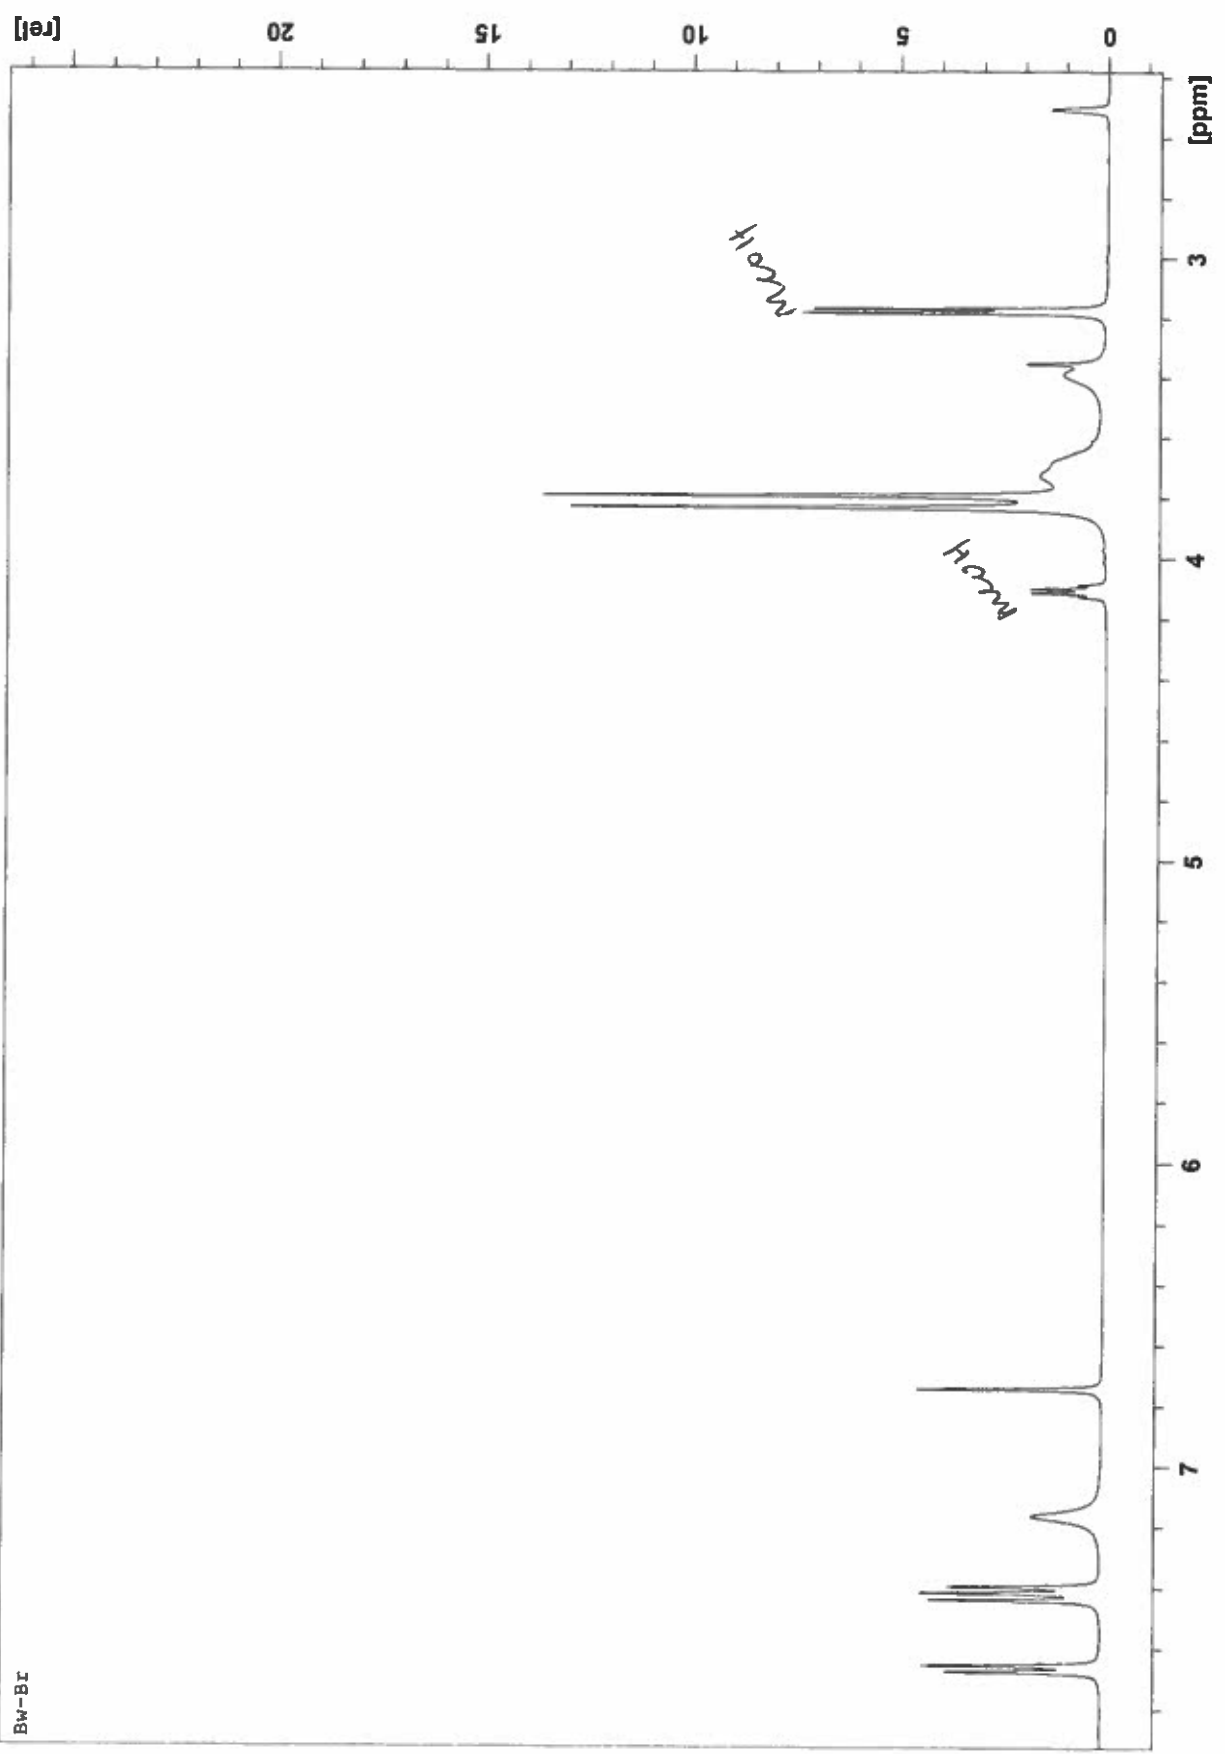

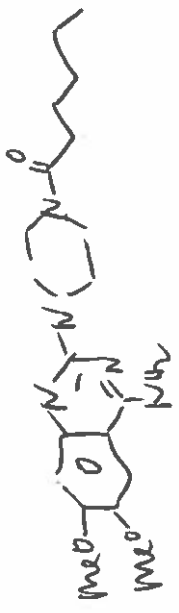

BW 25

01062014-C6 1 1 C:\Bruker\TopSpin3.2\zhongbo\01062014

BW-C5

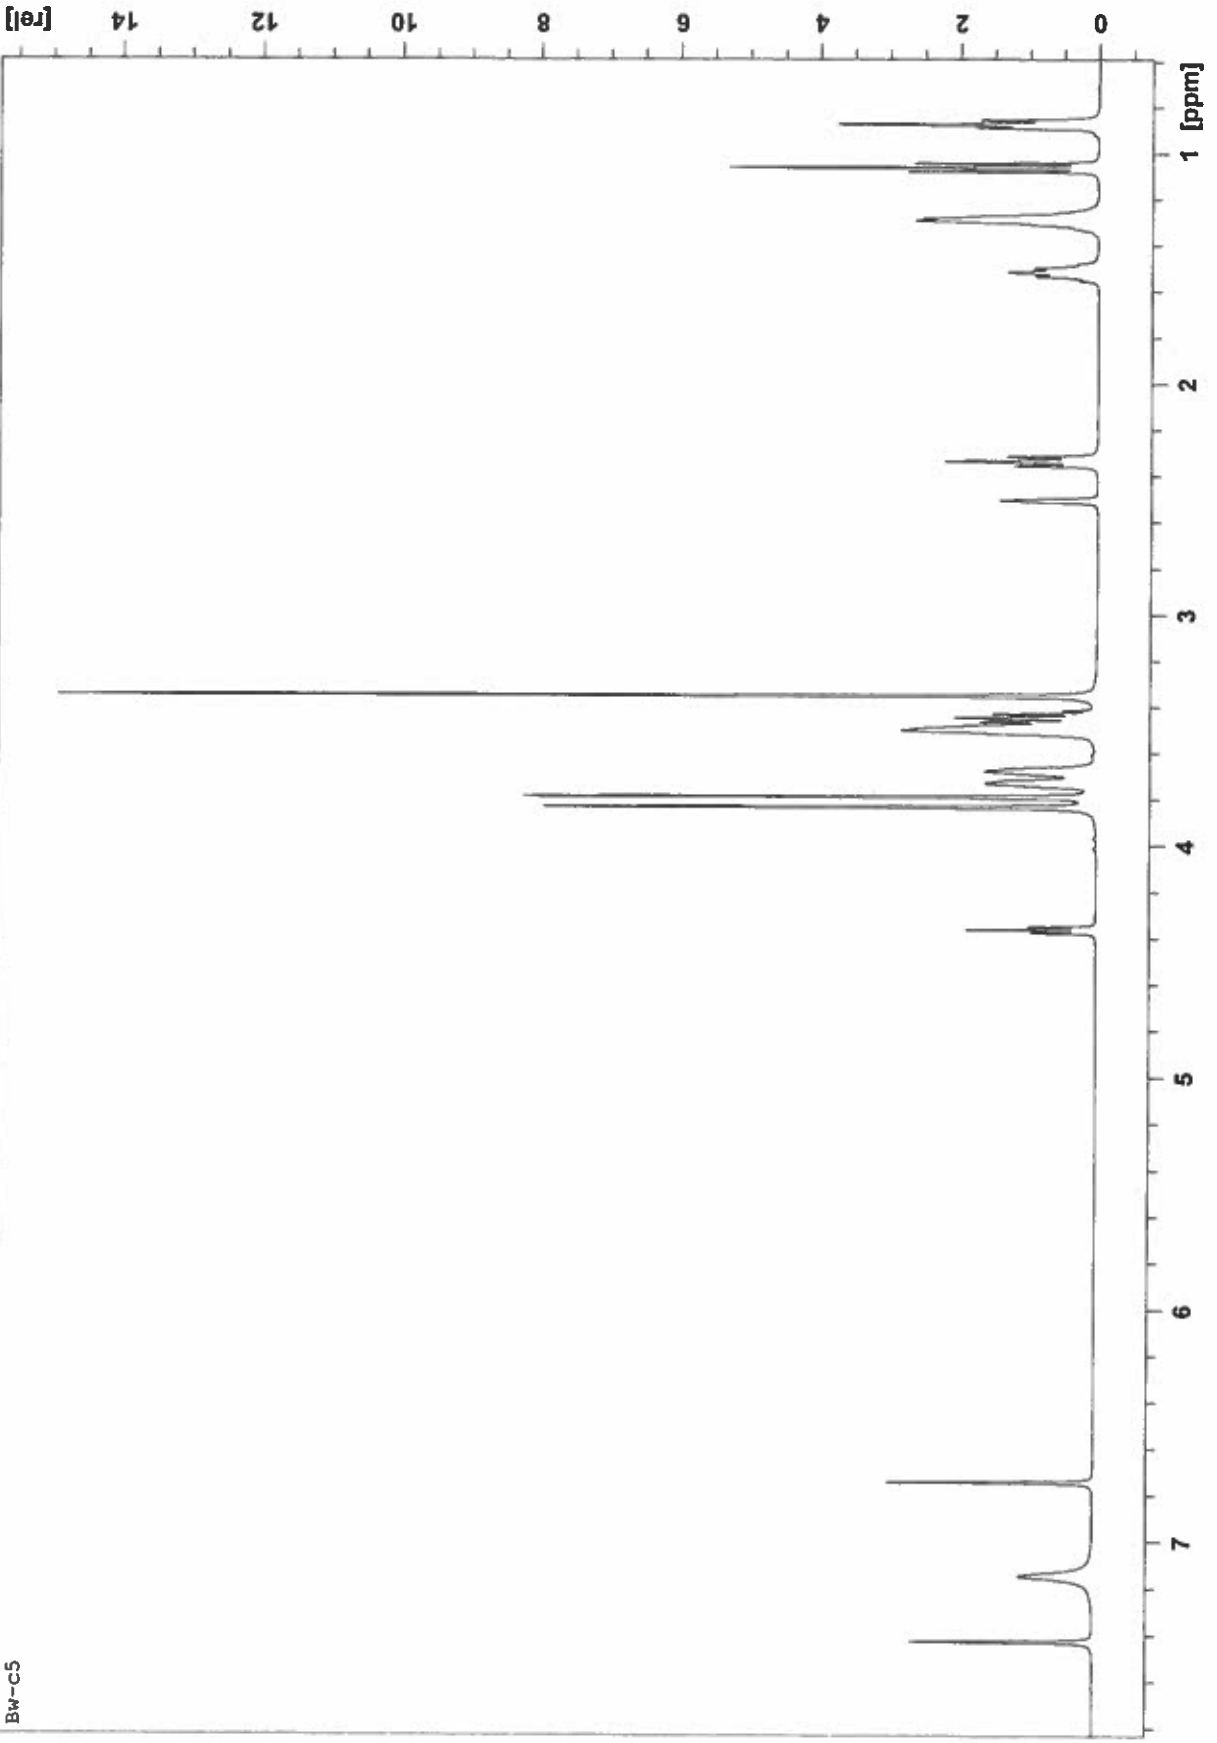





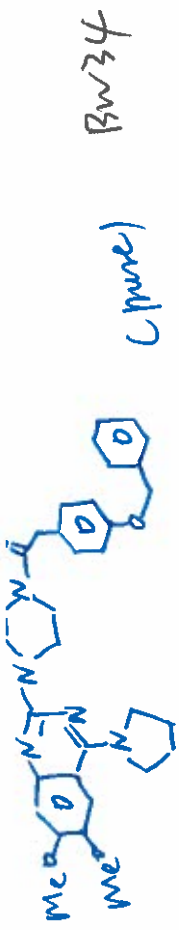

10142014 2 1 C:\Bruker\TopSpin3.2\bozhong\10142014

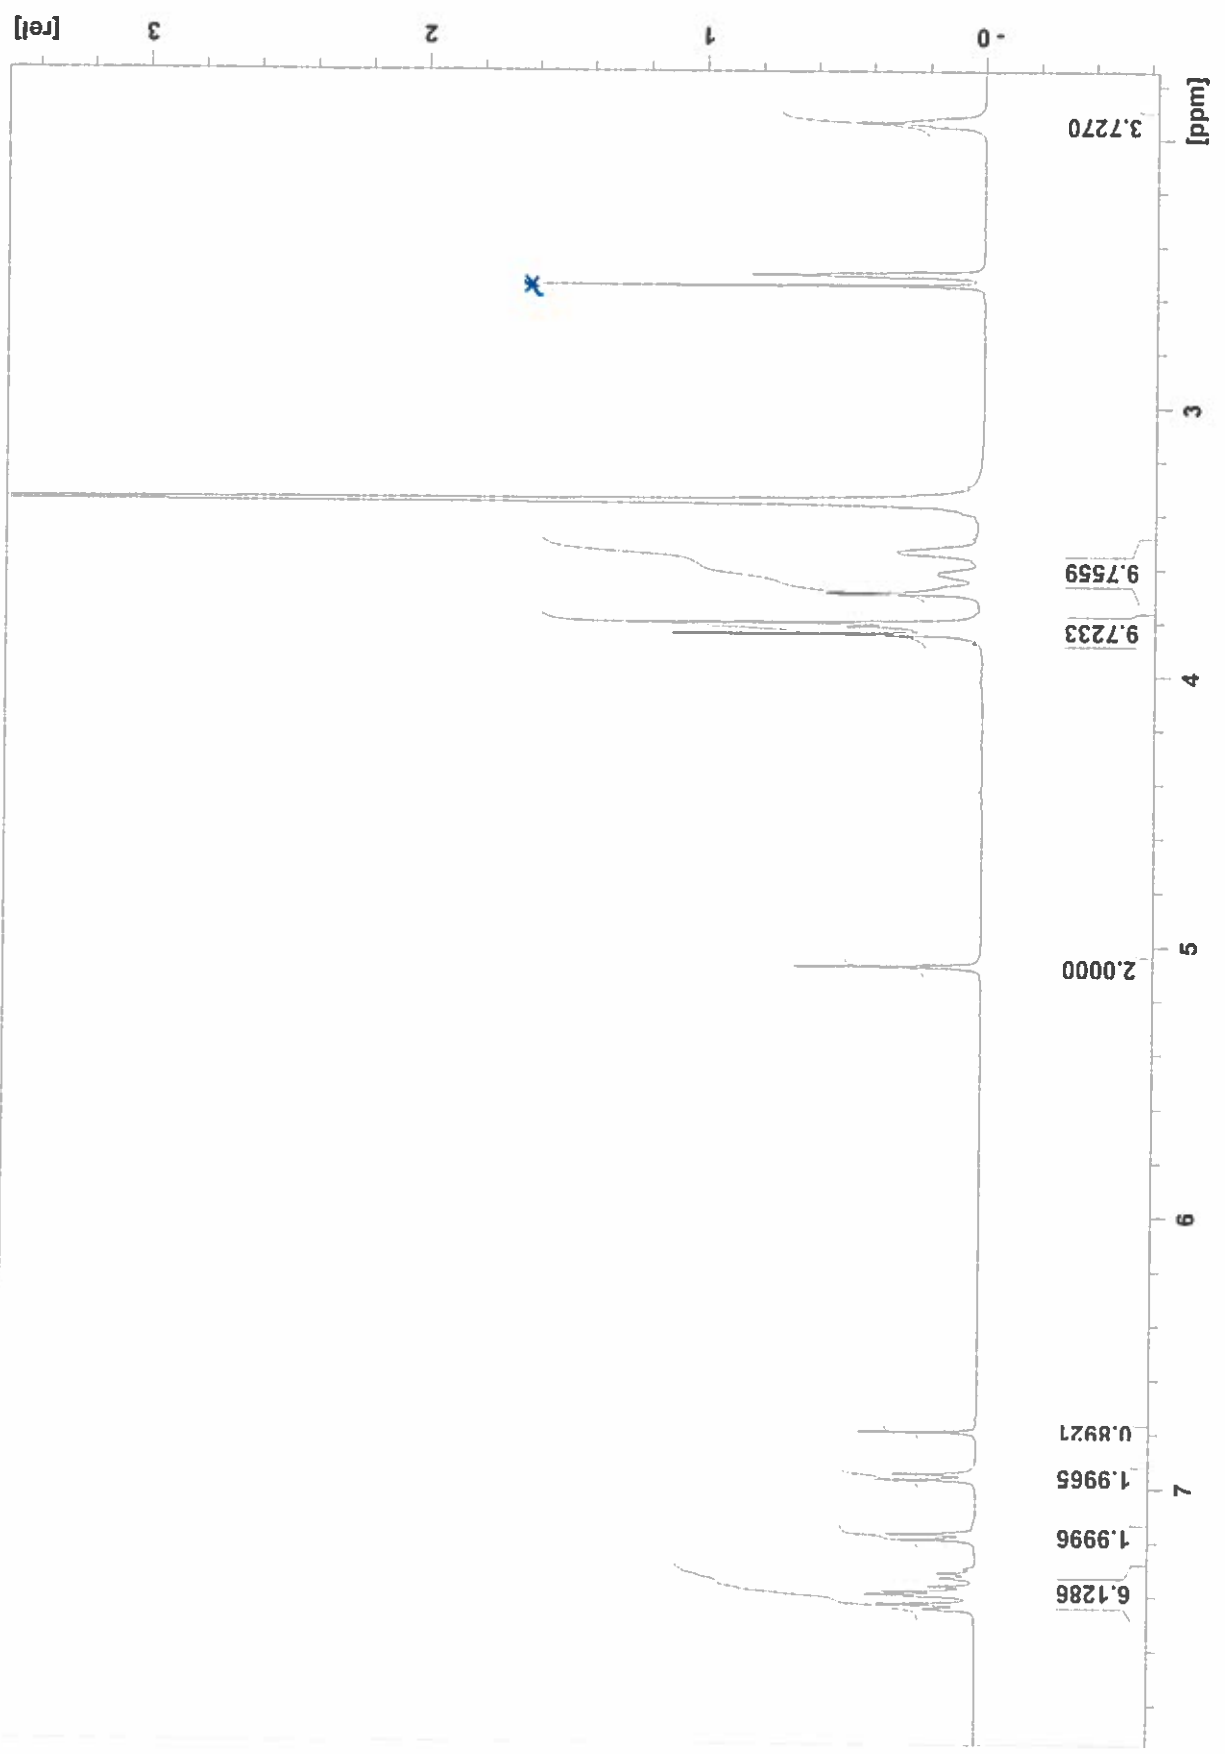

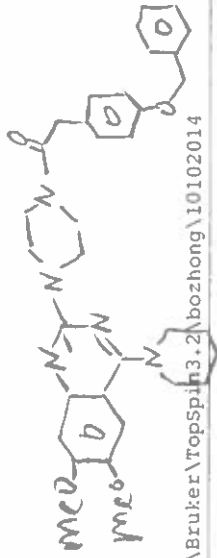

10102014 2 1 C:\Bruker\TopSpin3.2\bozhong\10102014

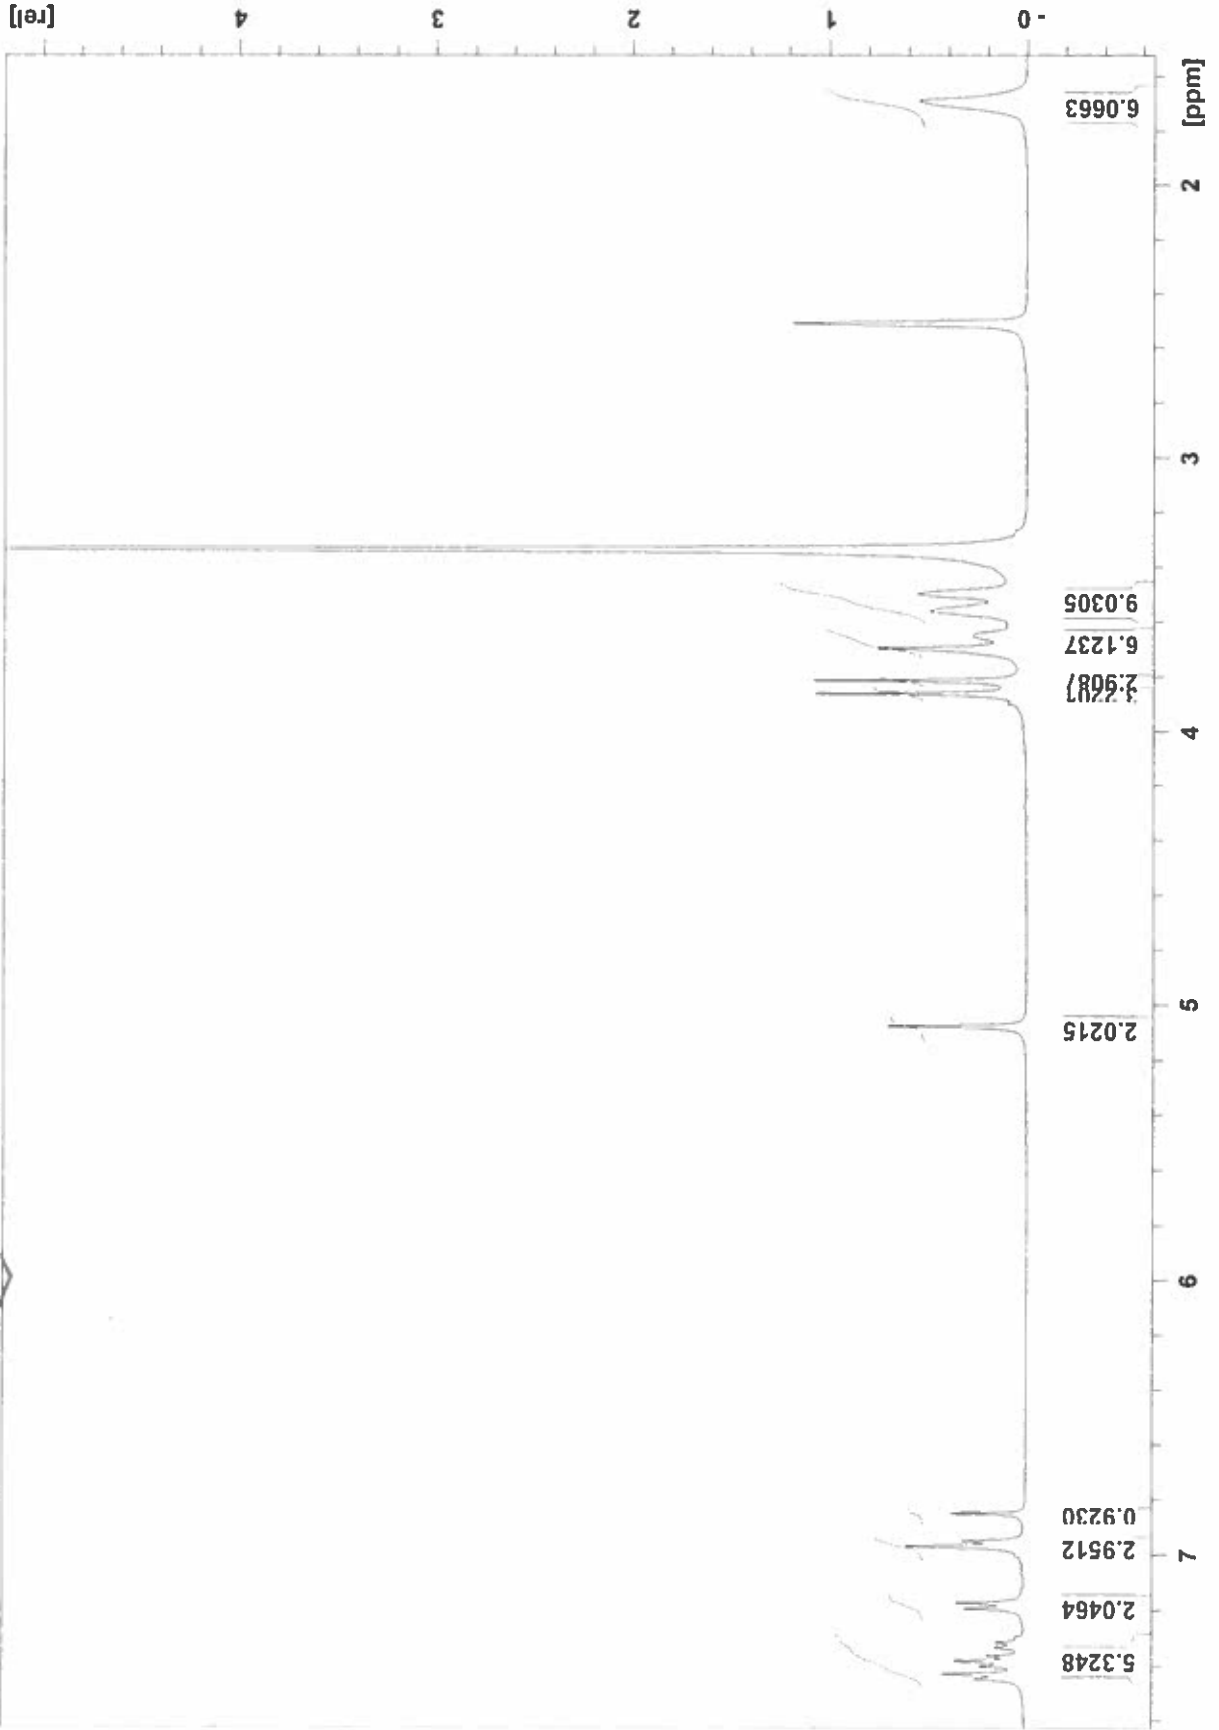

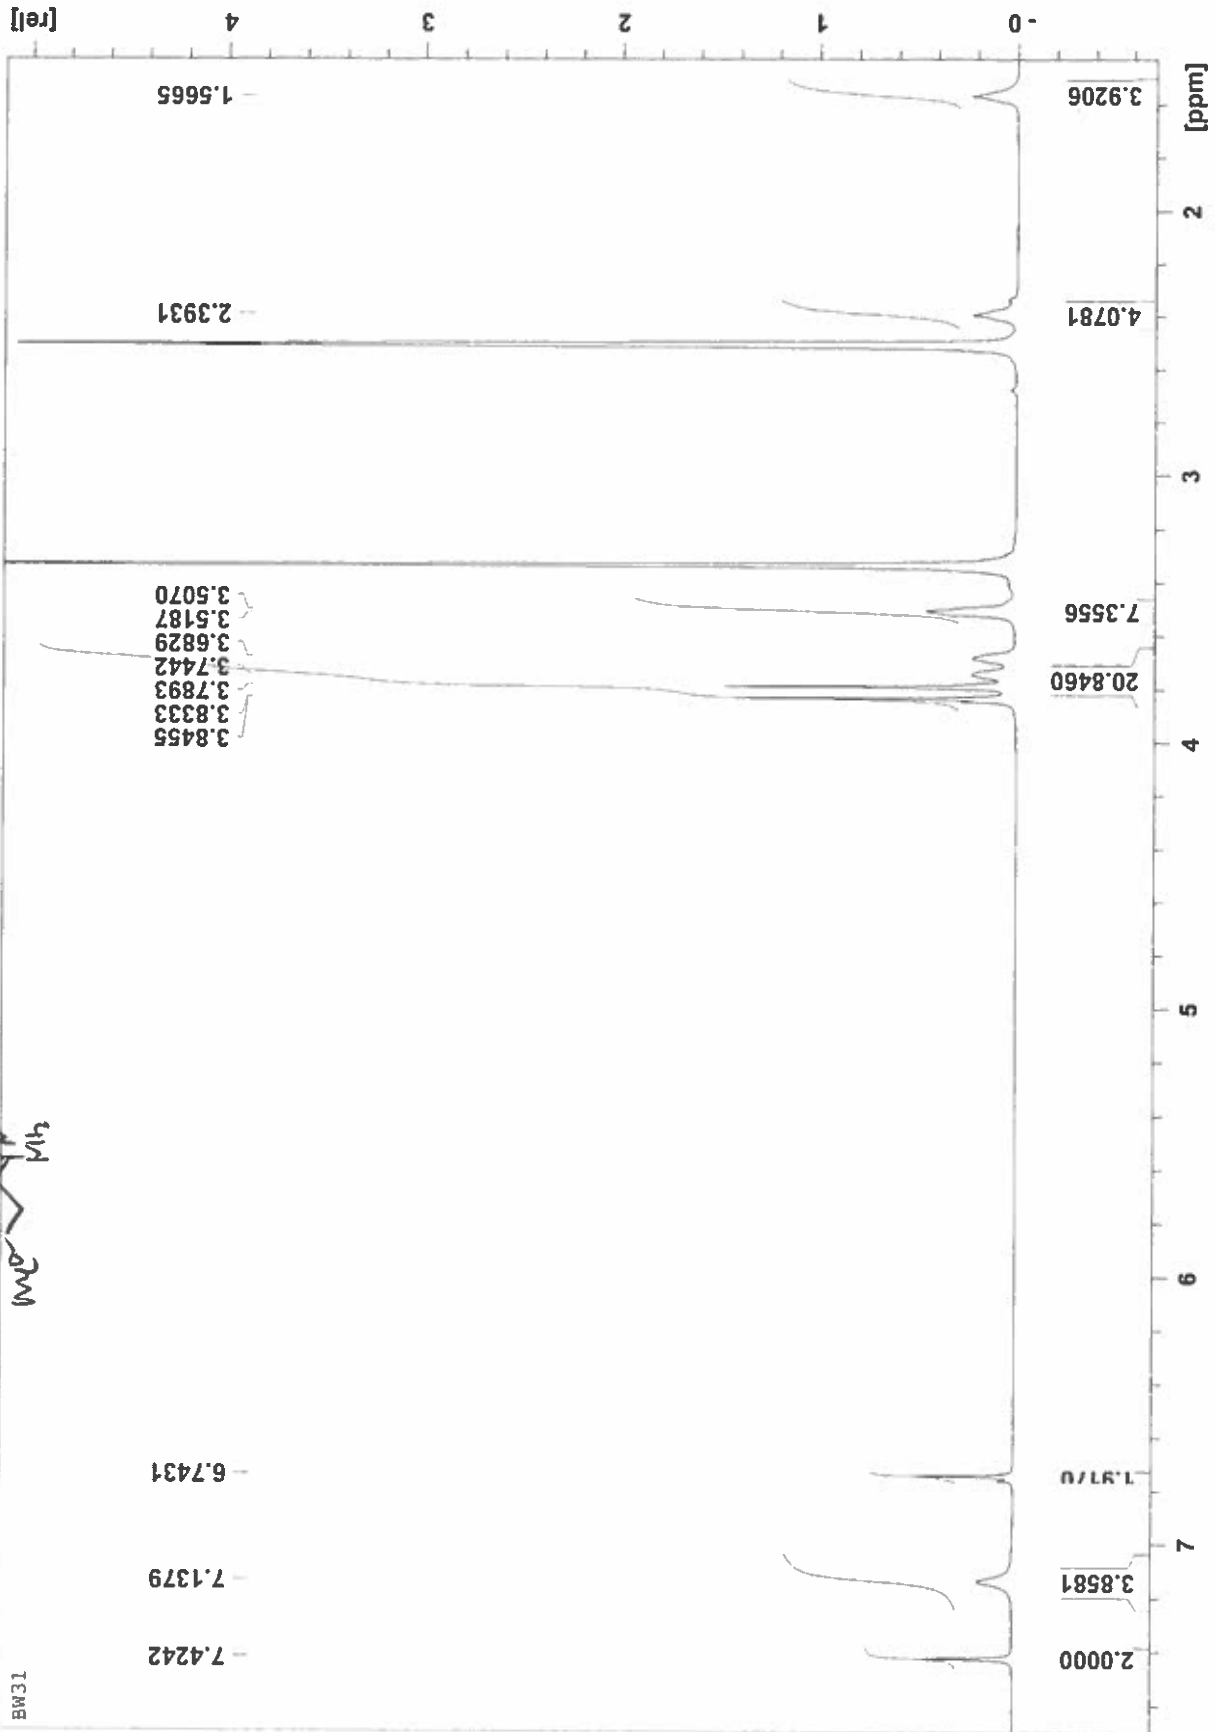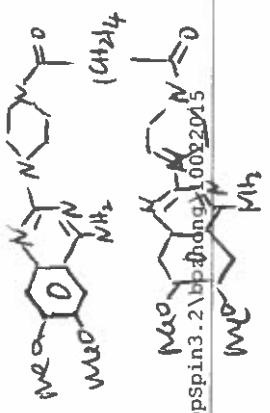

10022015 1 1 C:\Bruker\TopSpin3.2\bp\hdmg\_10022015

BW31

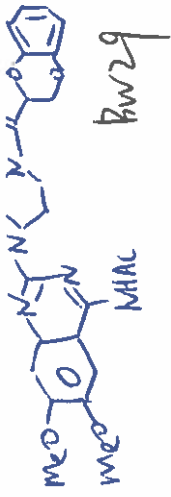

04242014 1 1 C:\Bruker\TopSpin3.2\bozhong\04242014

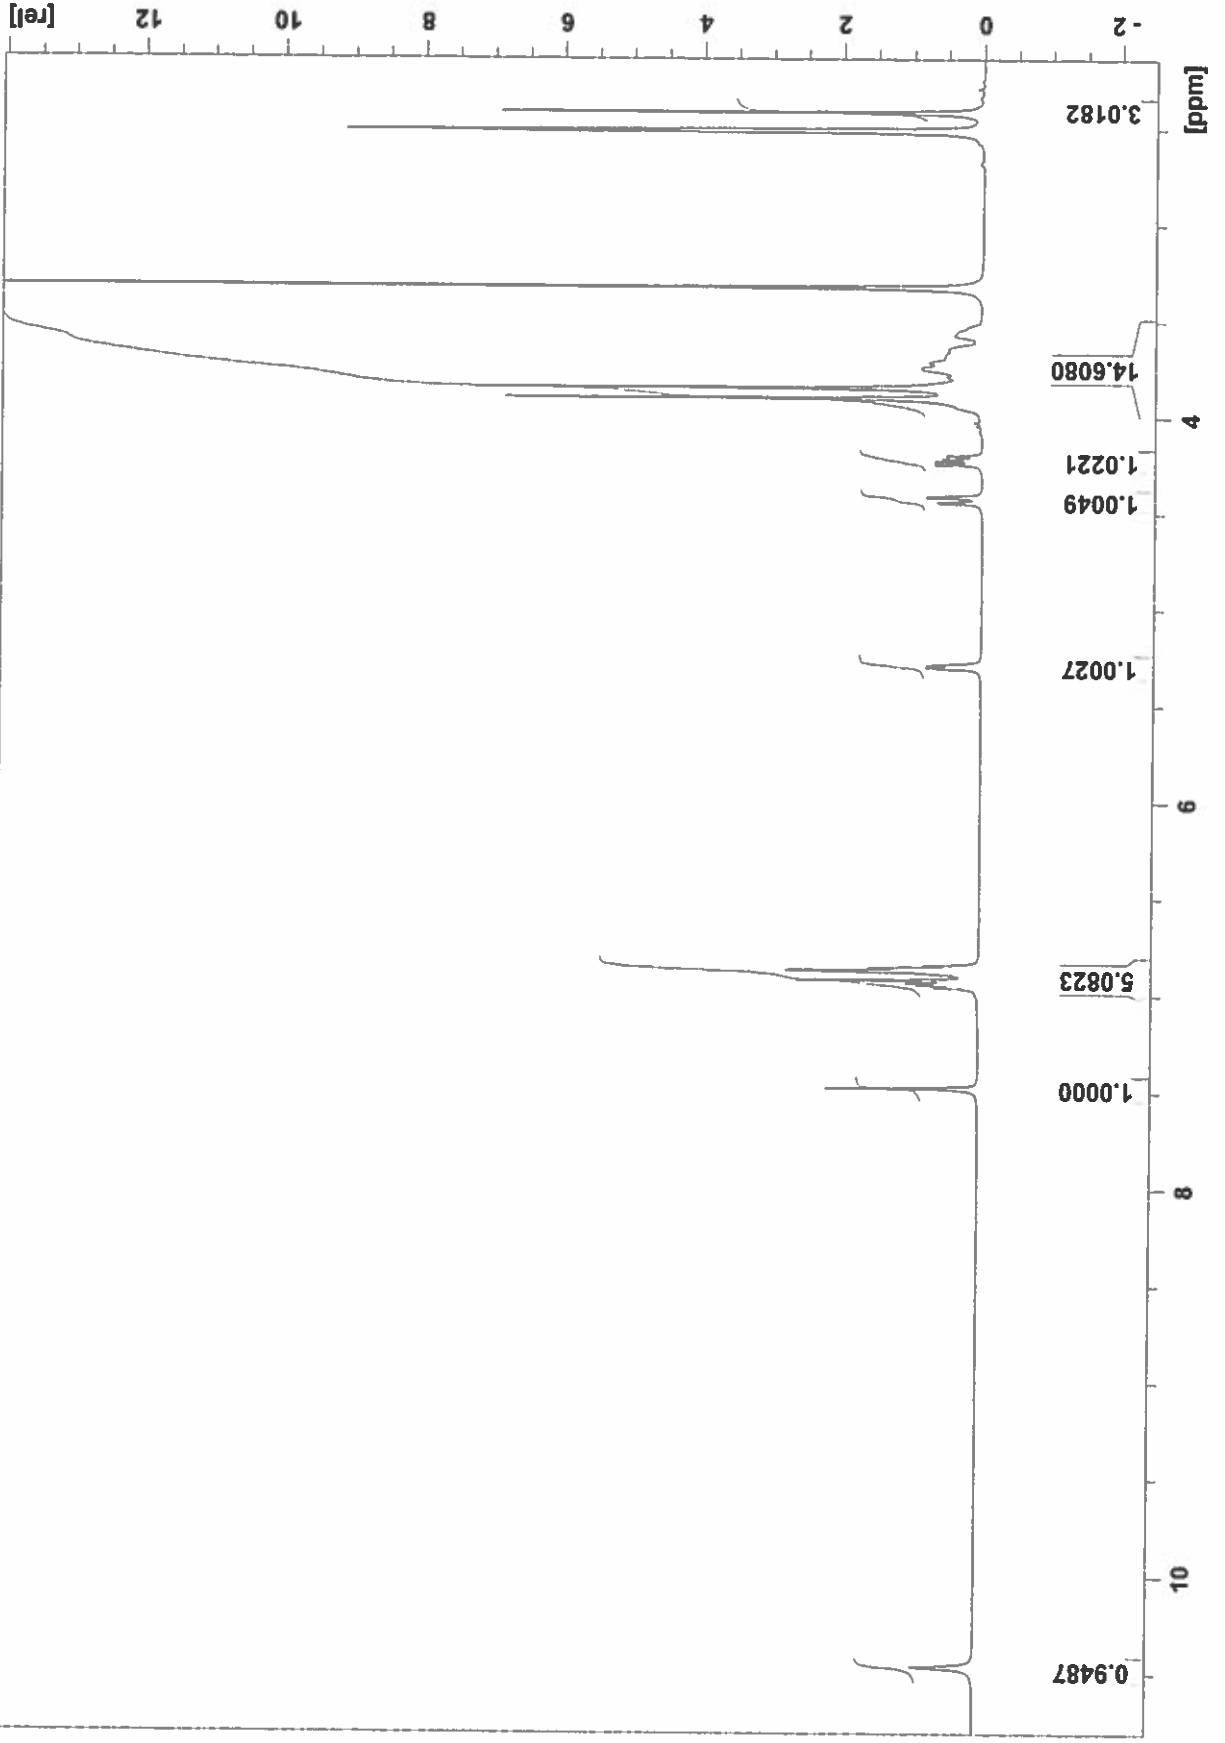

04021014  
ace

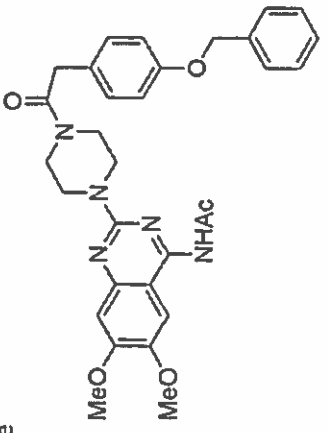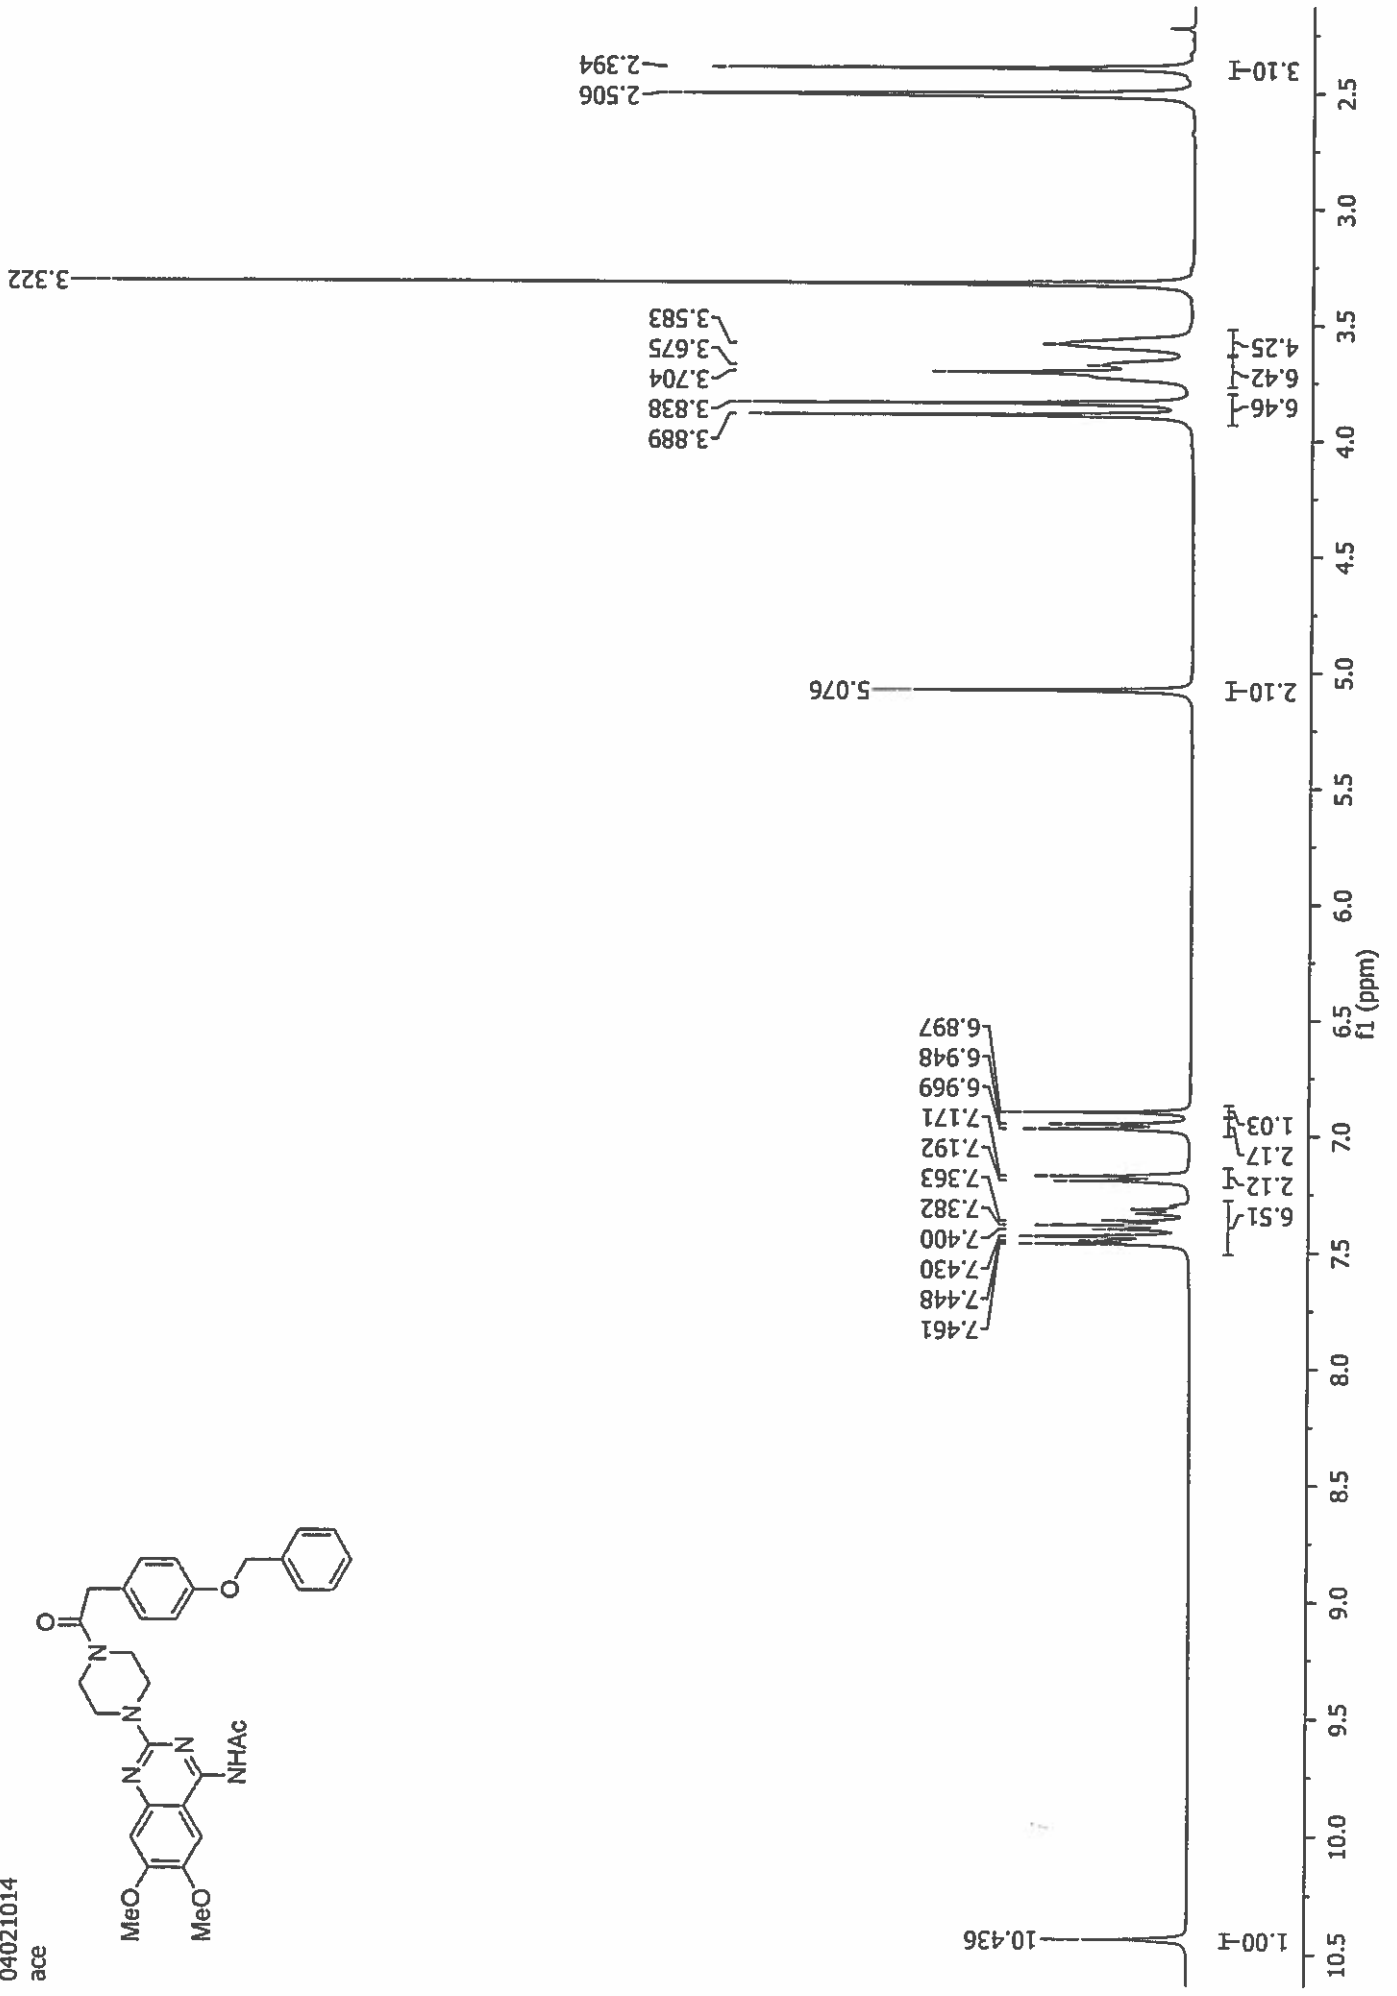

can't find the code (BNXX)  
for this compound

(pure)

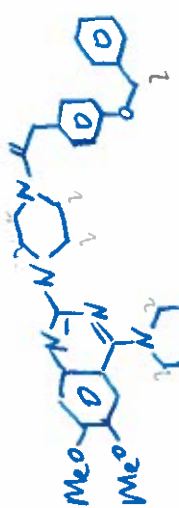

10142014 3 1 C:\Bruker\TopSpin3.2\bozhong\10142014

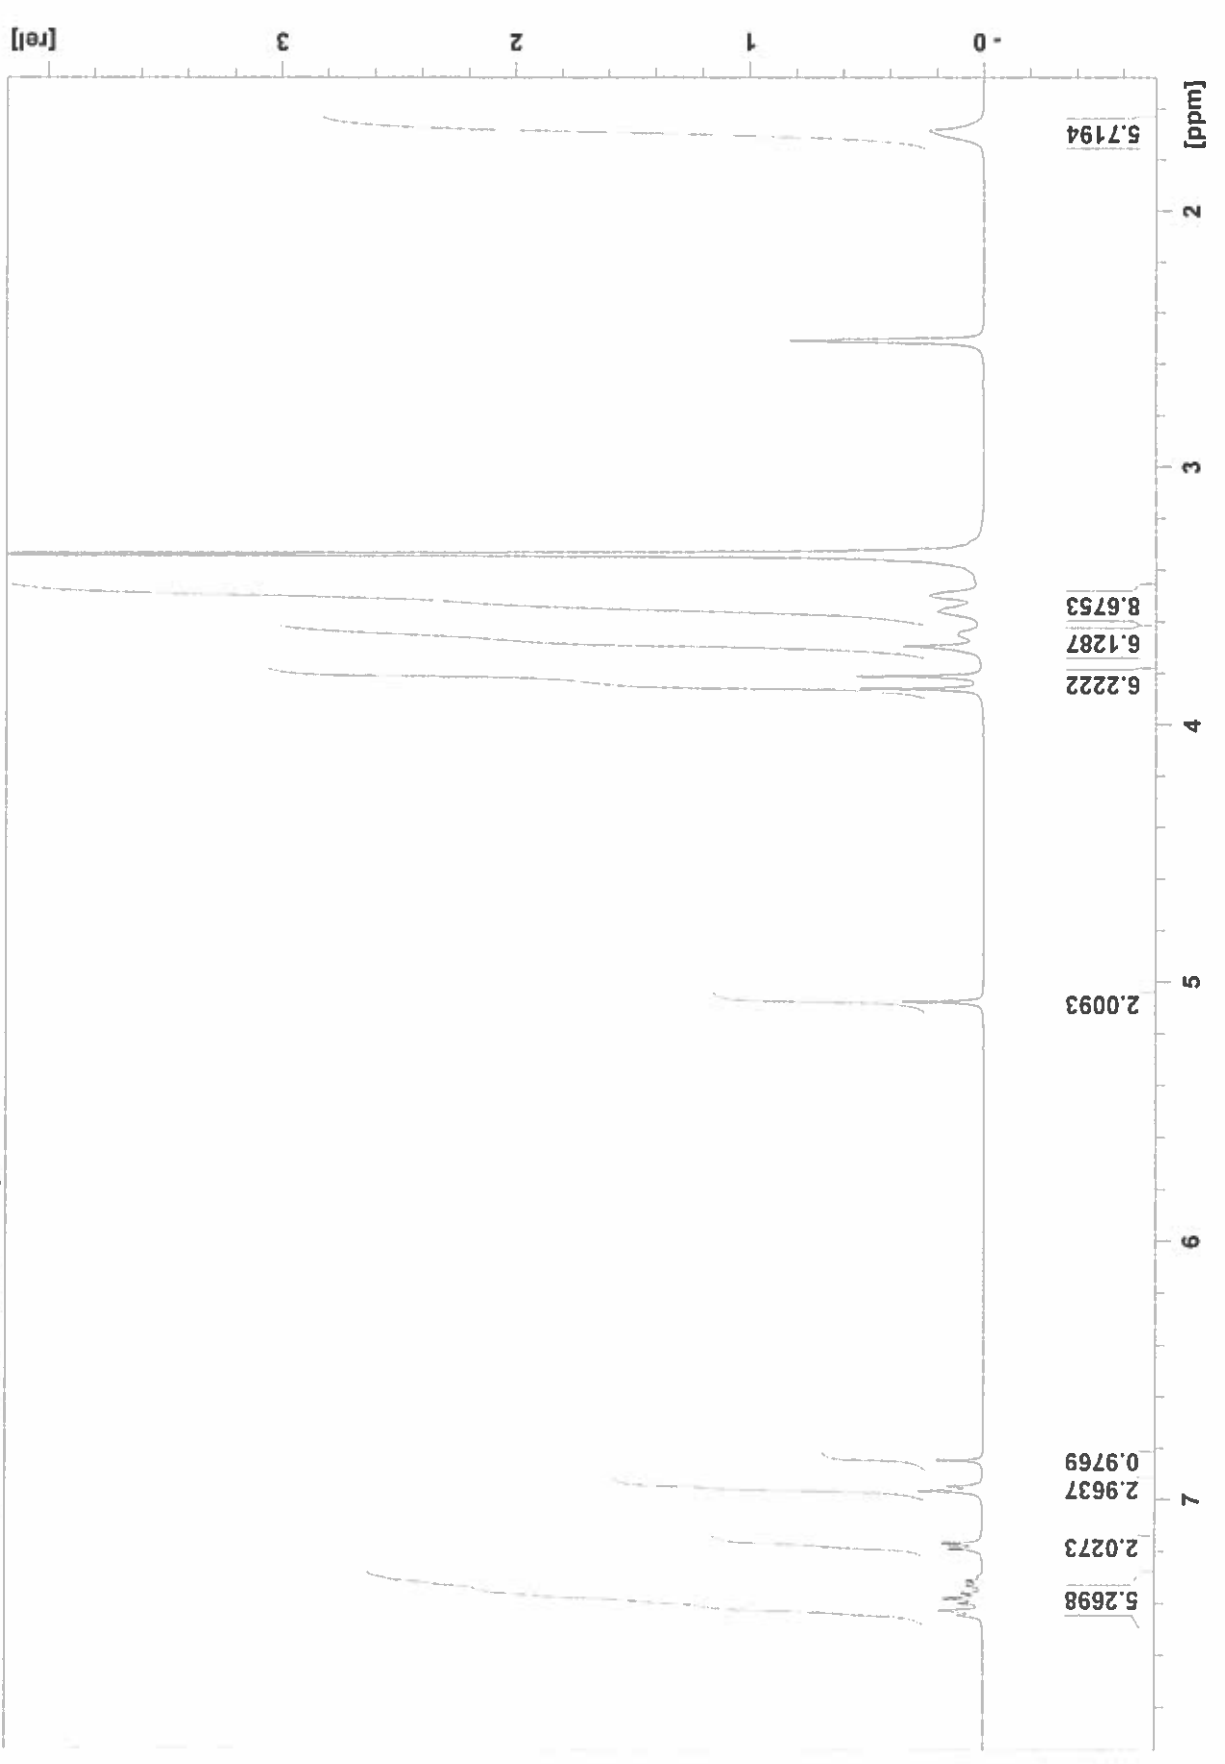

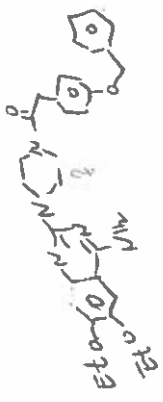

12012014 2 1 C:\Bruker\TopSpin3.2\bozhong\12012014

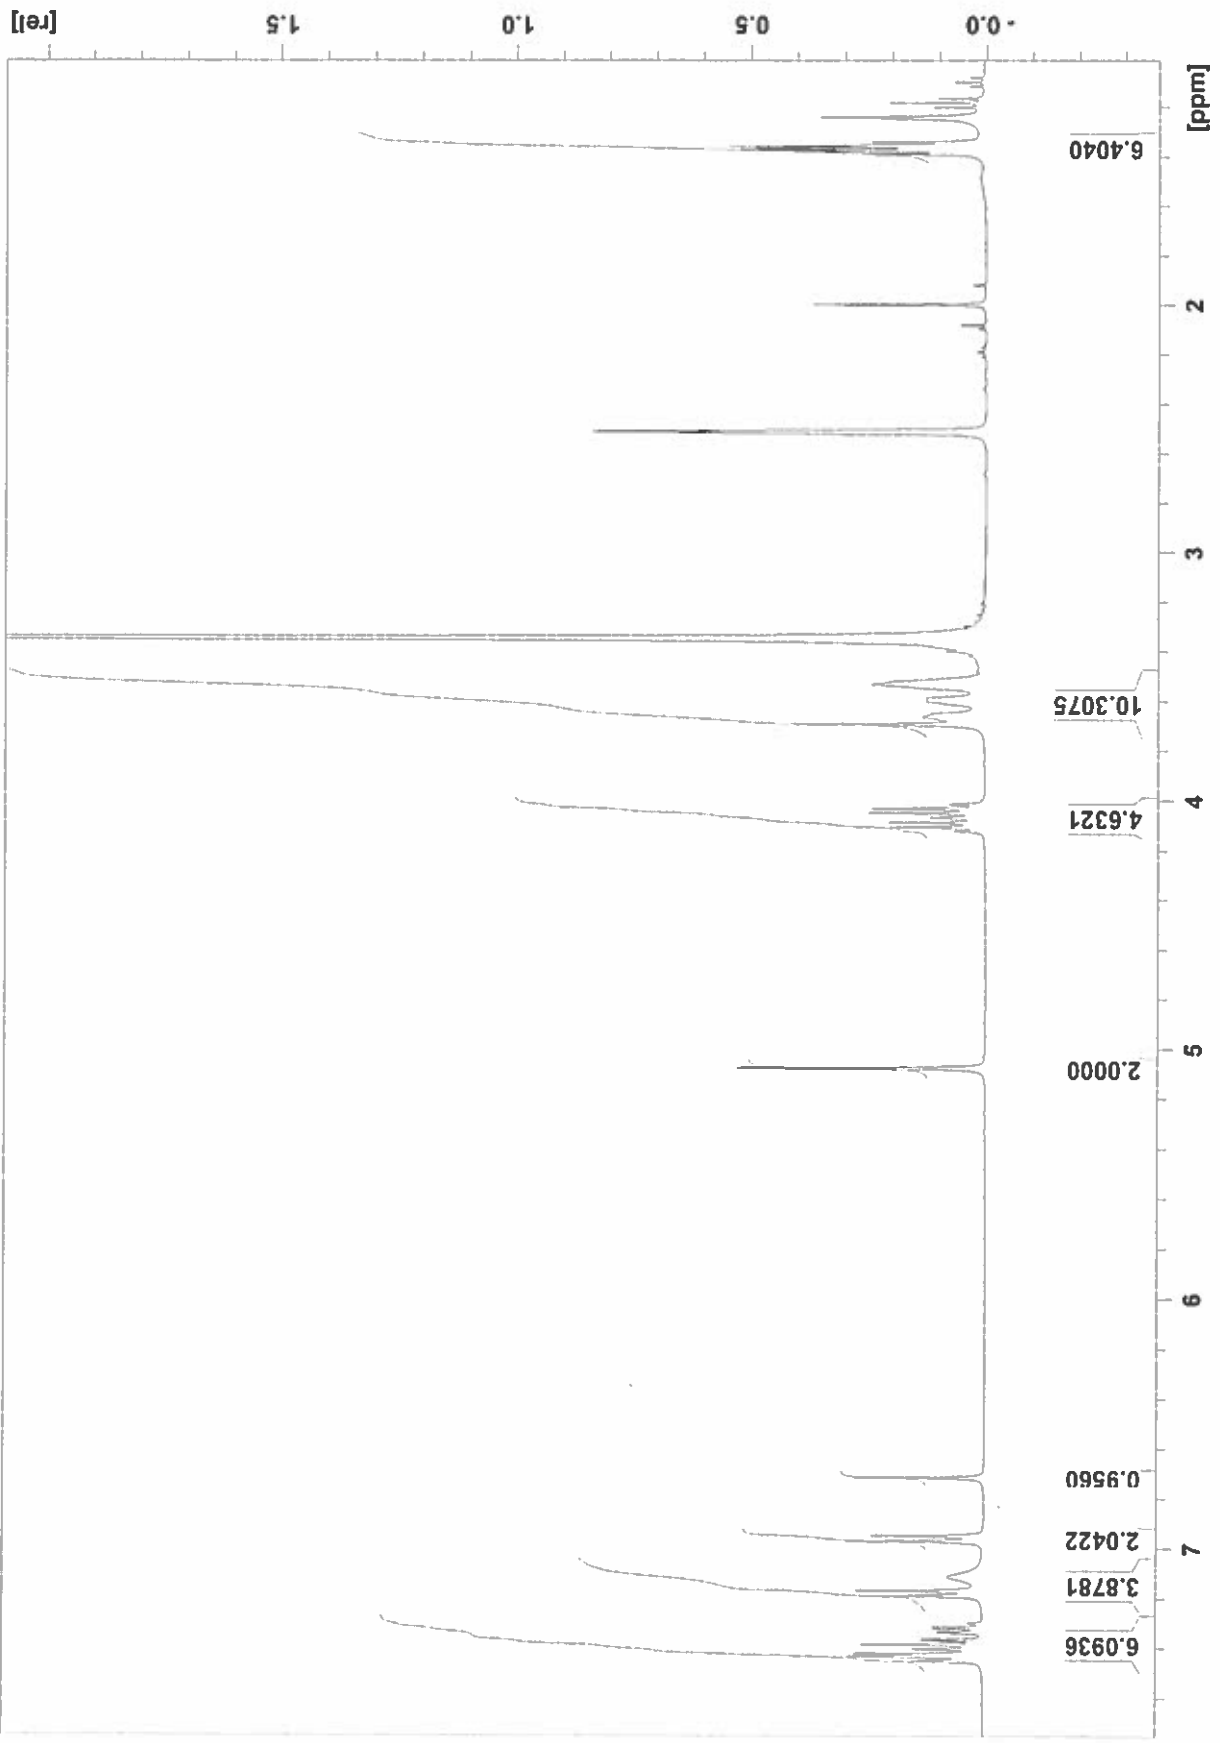

"BW 27 13C NMR" 1 1 "C:\Bruker\TopSpin3.2\viharika\bw compounds"

BW 27 13C NMR

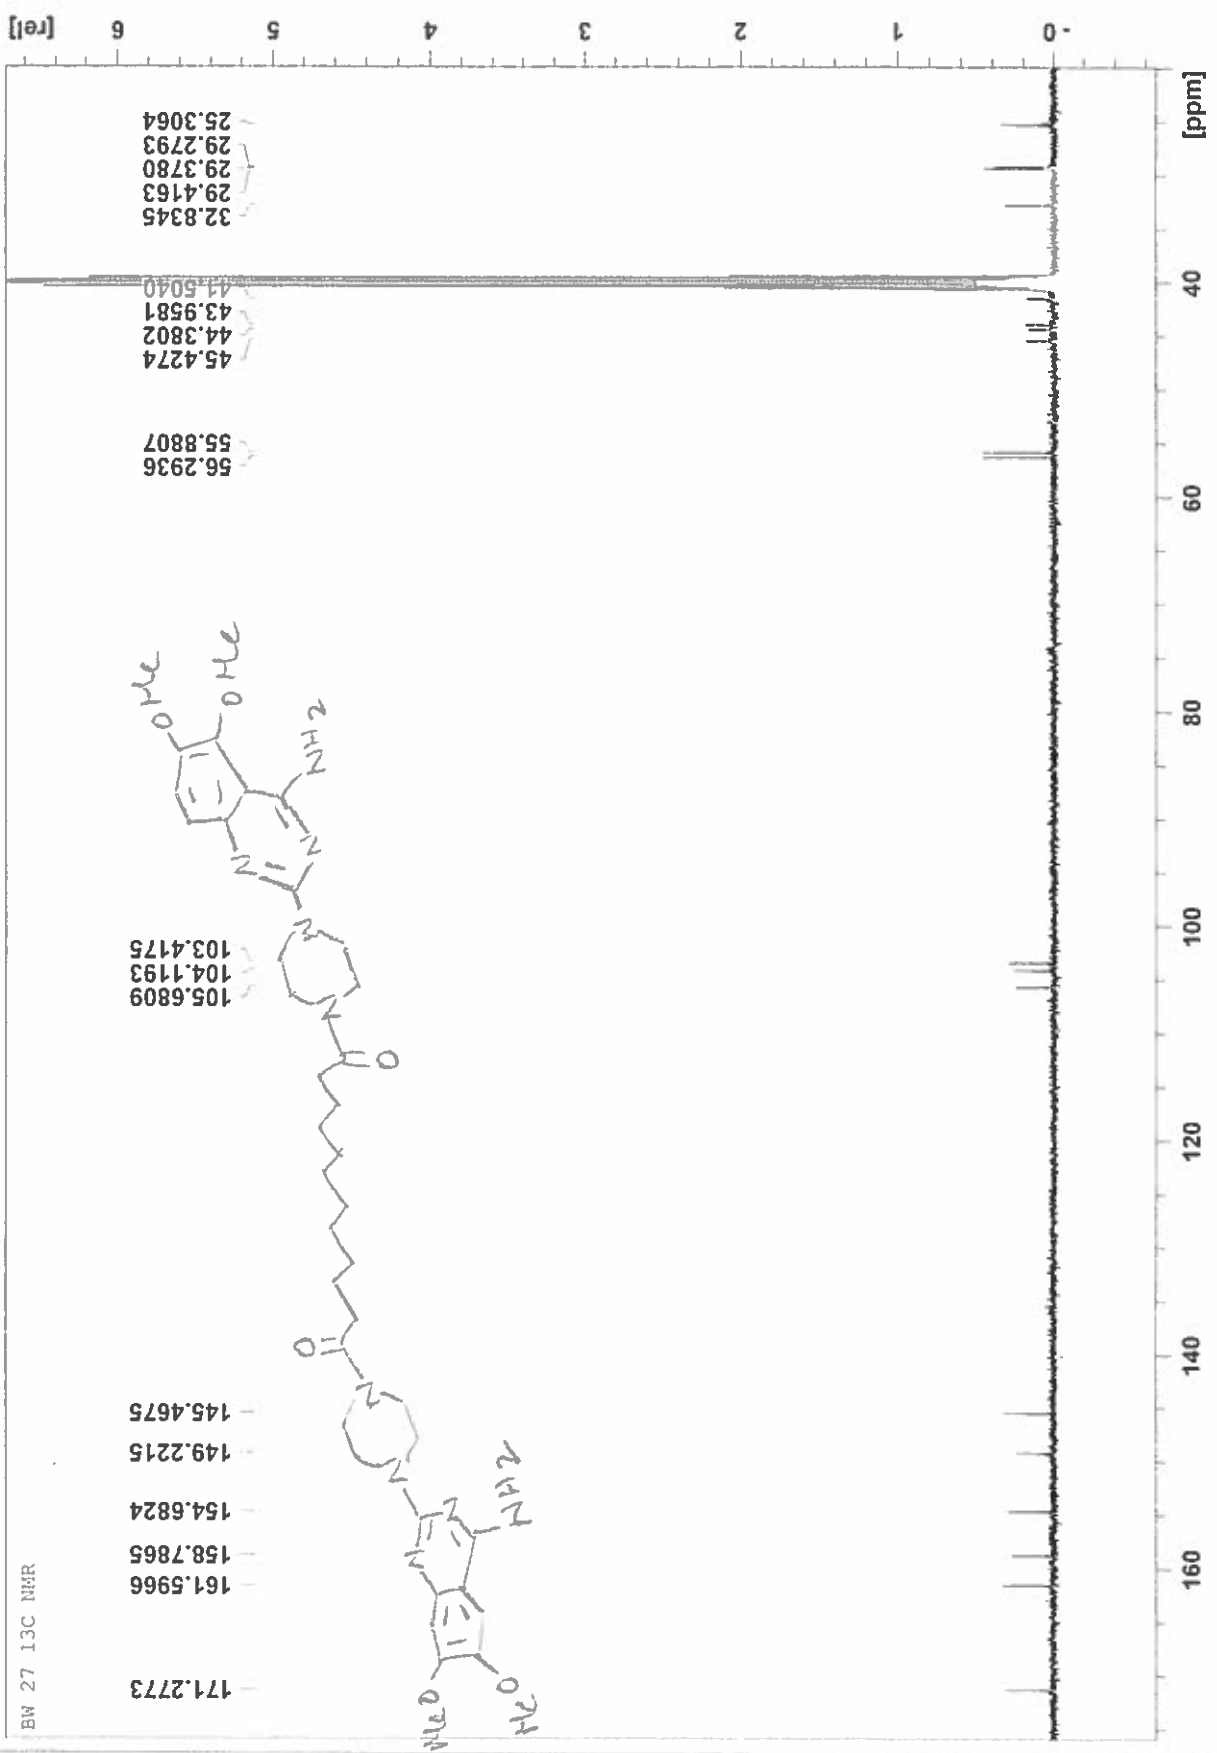



"BW 26 C13CPD" 2 2 "C:\Bruker\TopSpin3.2\viharika\bw compounds"

BW 26 C13CPD

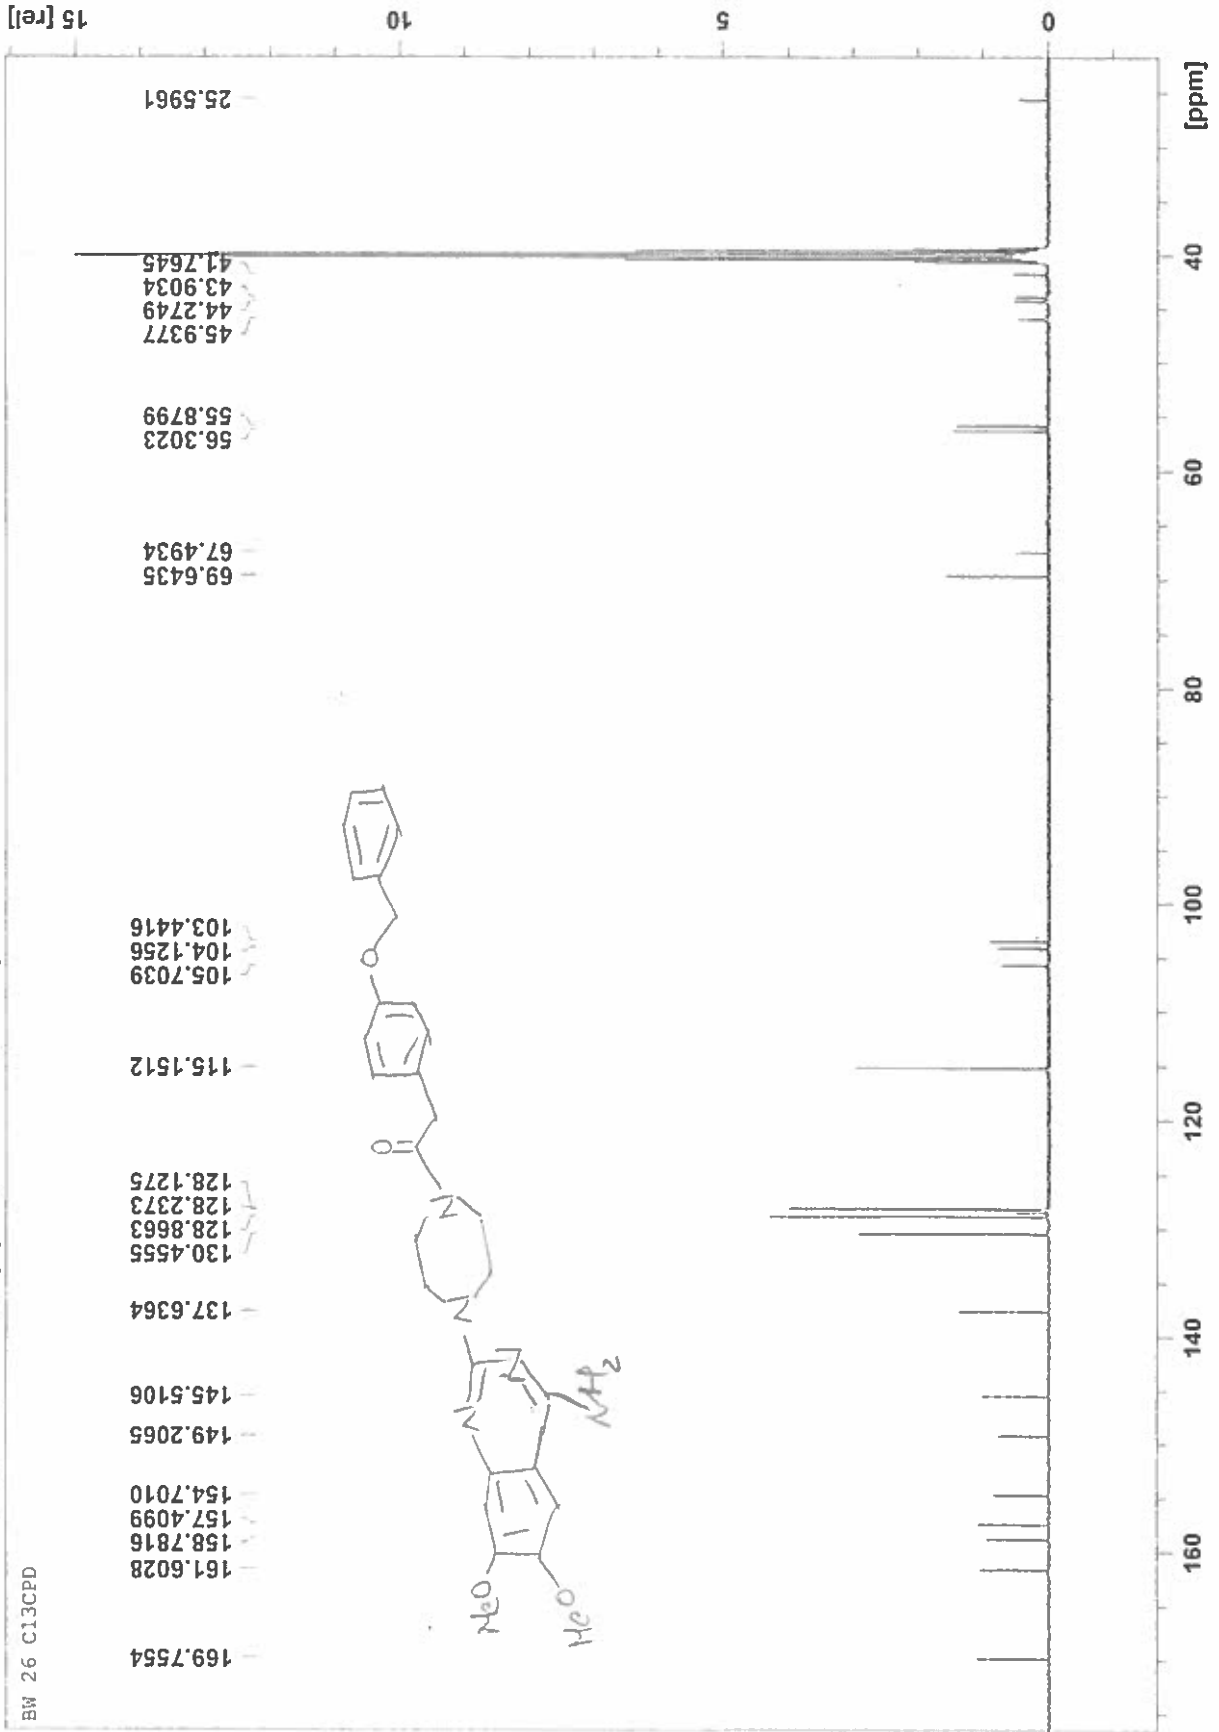

"BW 8 13 C NMR" 1 1 "C:\Bruker\TopSpin3.2\viharika\bw compounds"

BW 8 13 C NMR

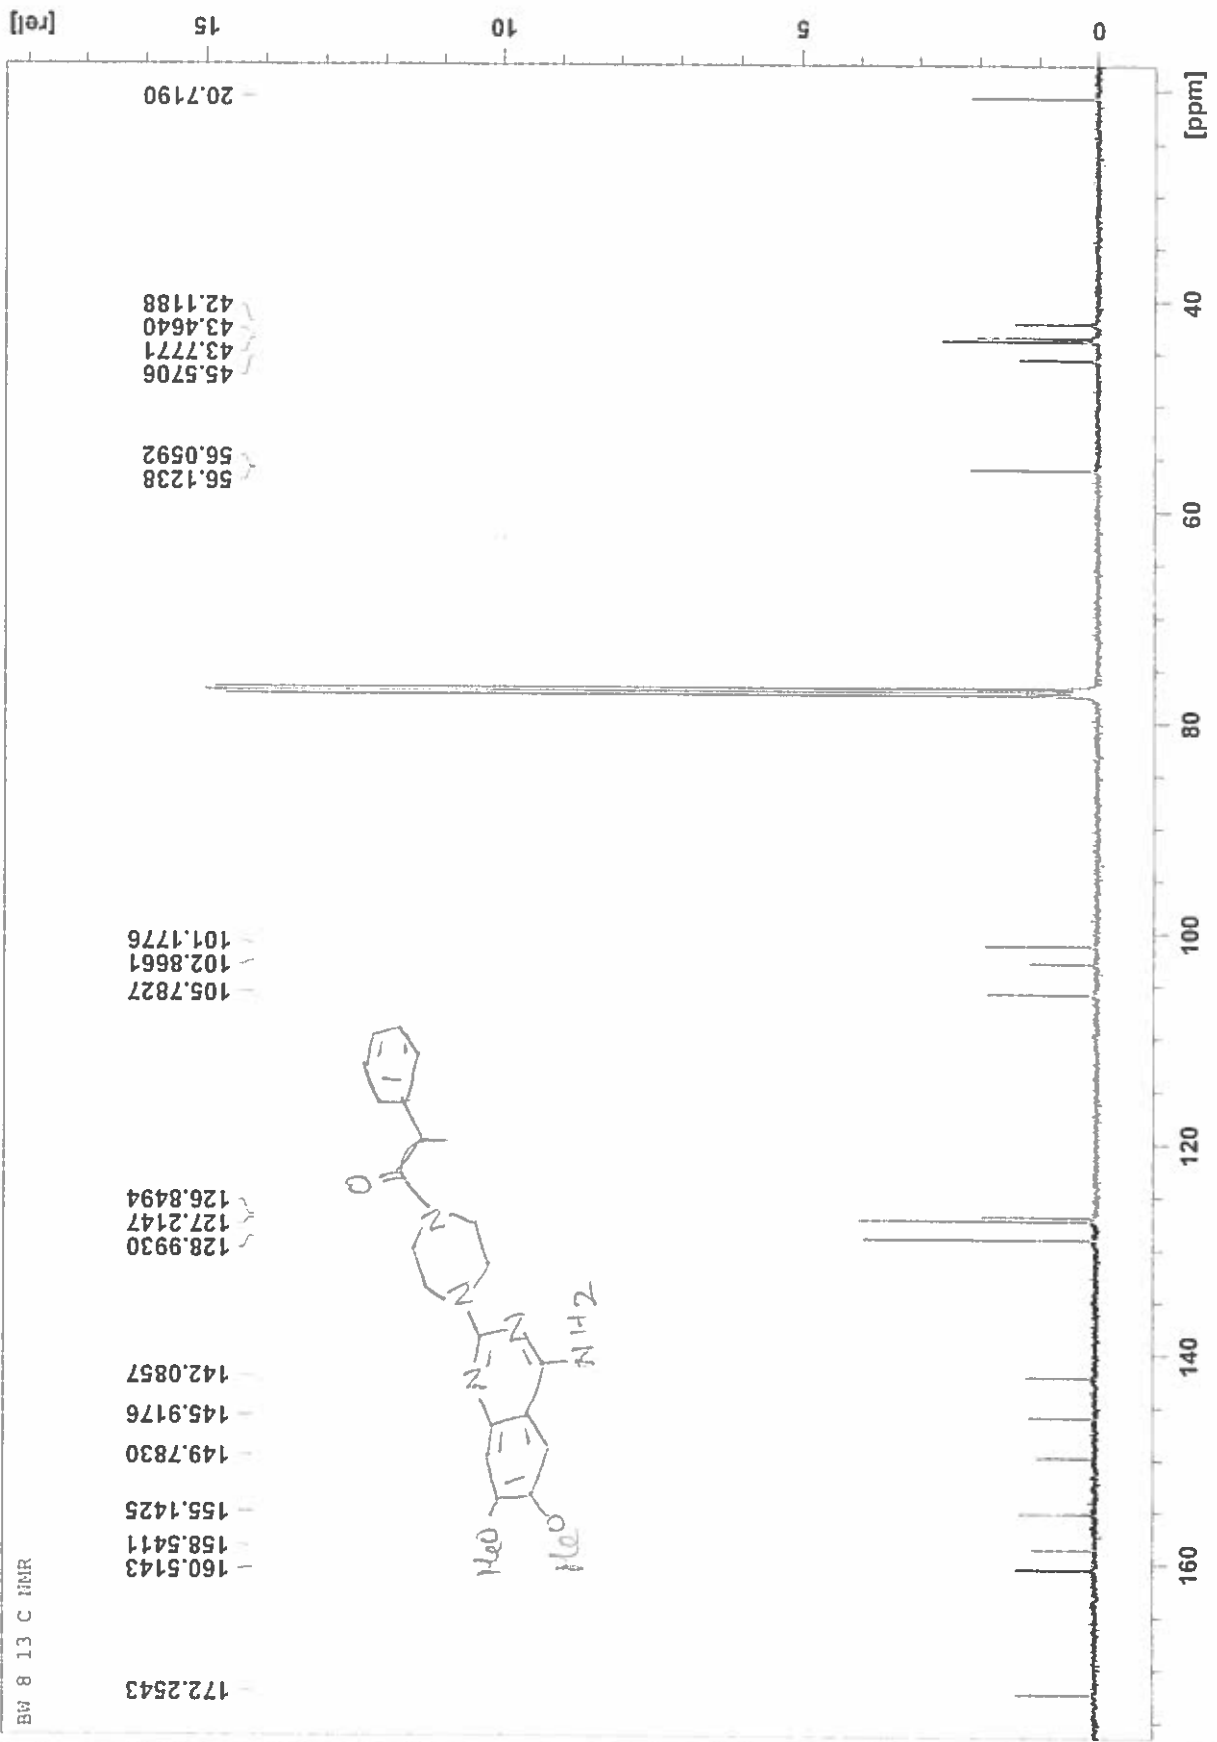

"BW 9 13C NMR" 1 1 "C:\Bruker\TopSpin3.2\Aviharika\bw compounds"  
BW 9 13C NMR

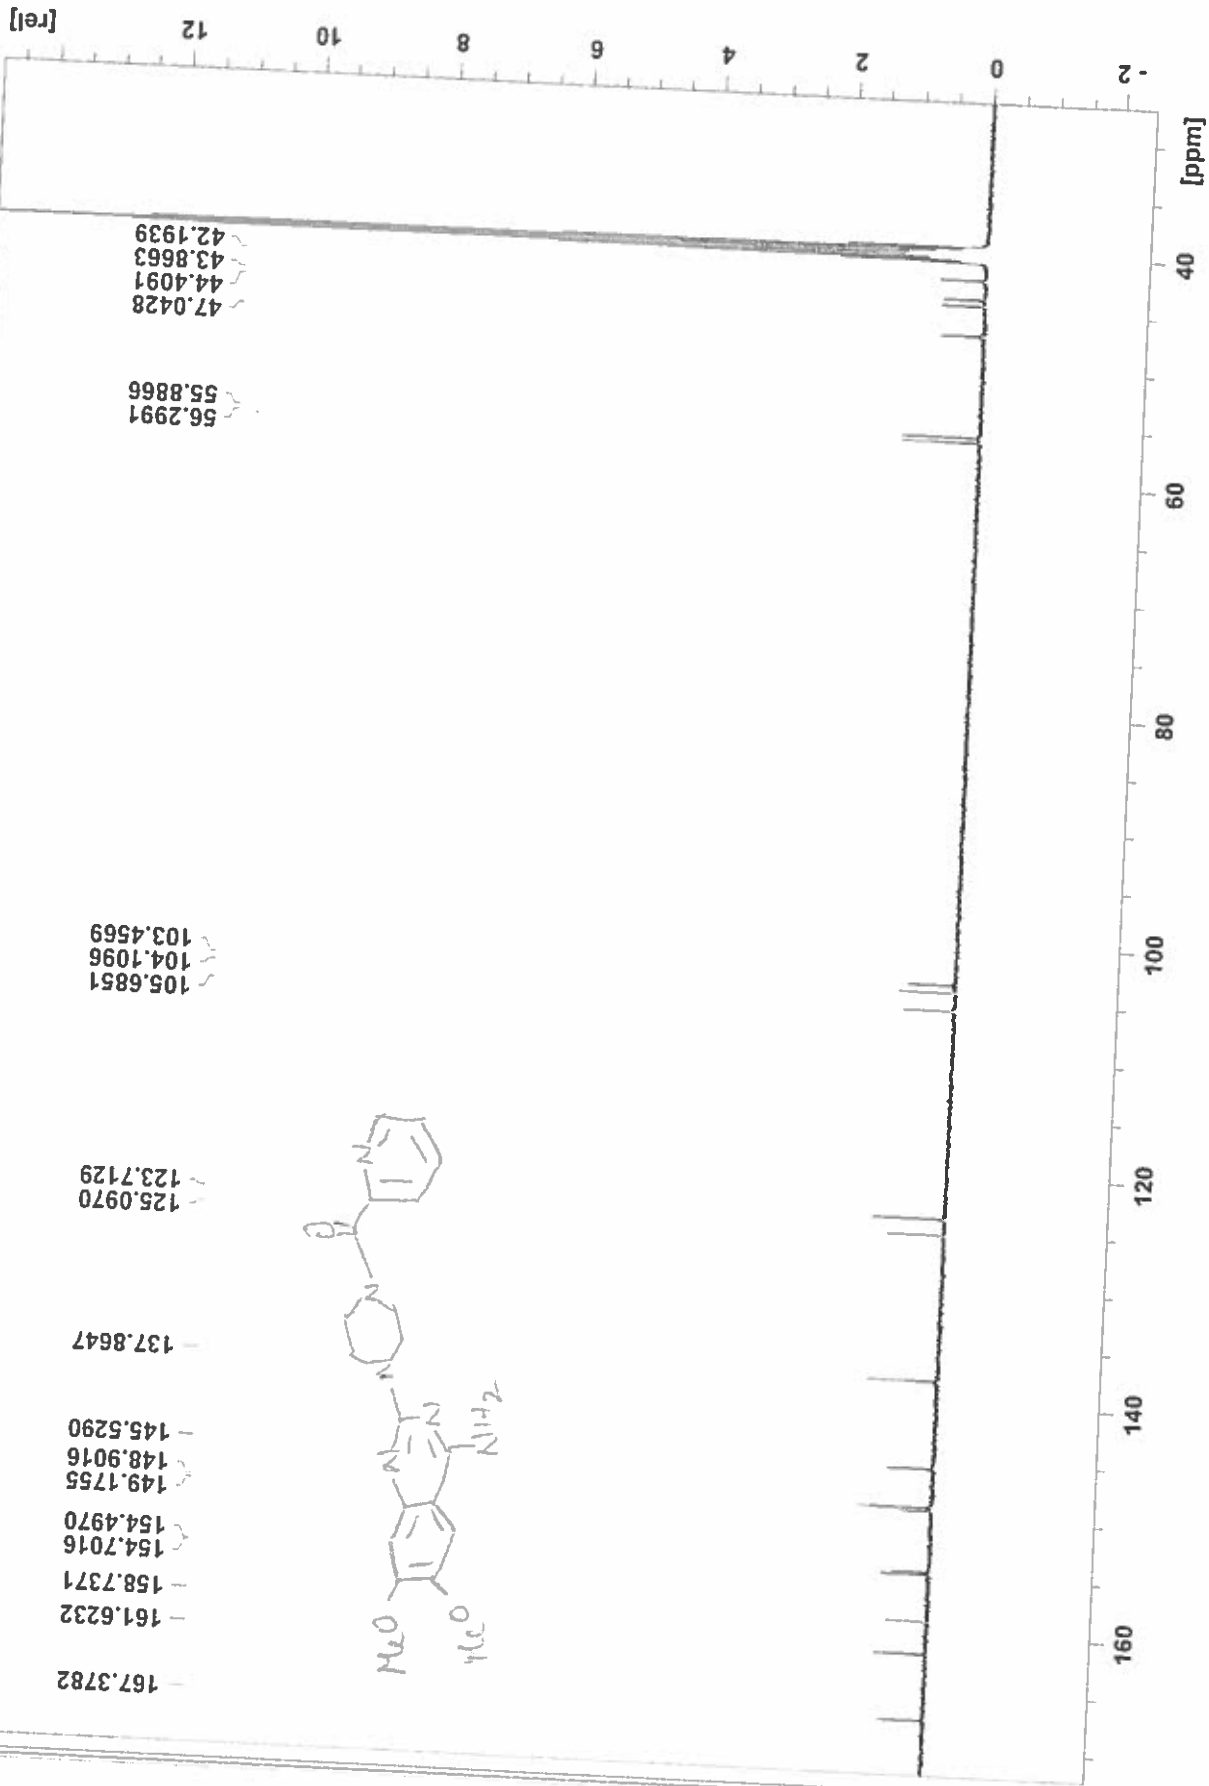

"BW 10 13C NMR" 1 1 "C:\Bruker\TopSpin3.2\viharika\bw compounds"

BW 10 13C NMR

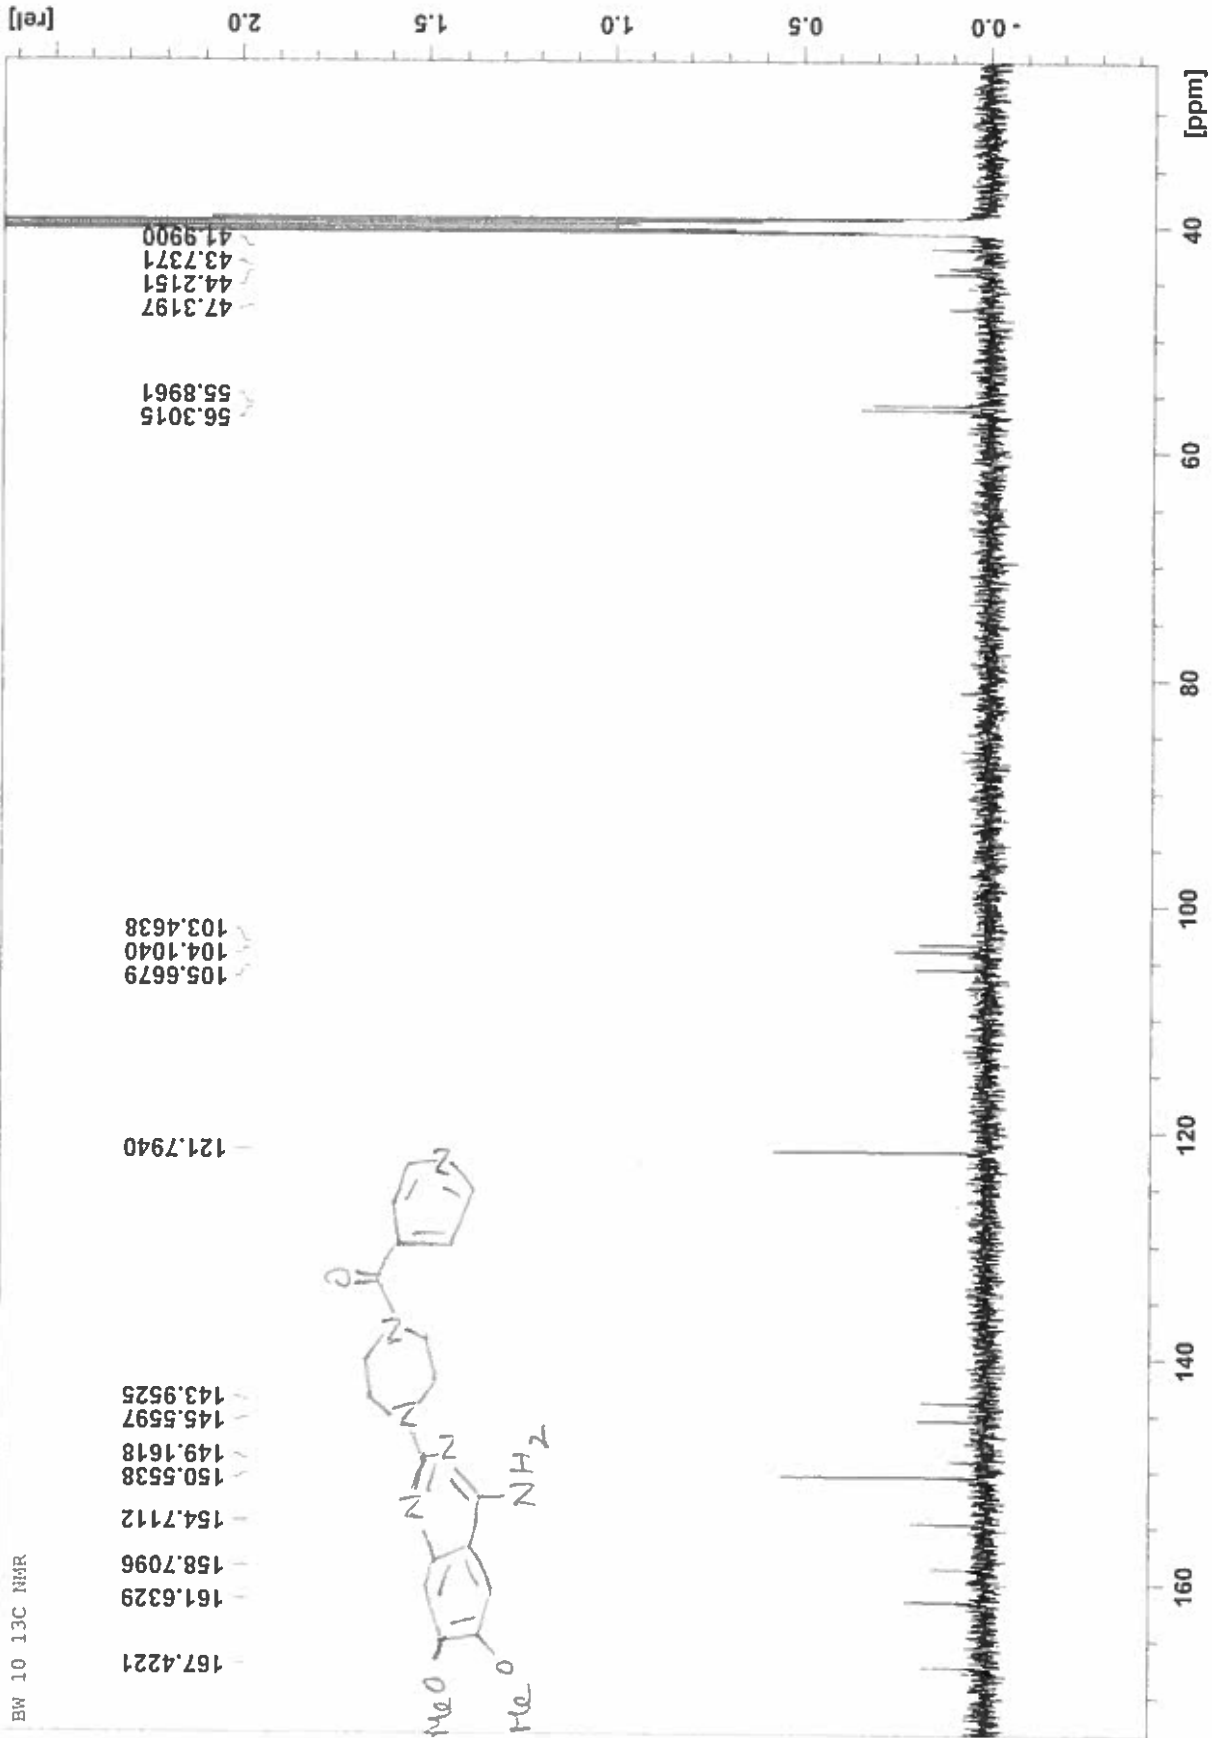

"BW-11 13 C NMR" 2 2 "C:\Bruker\TopSpin3.2\viharika\bw compounds"

BW-11 13 C NMR

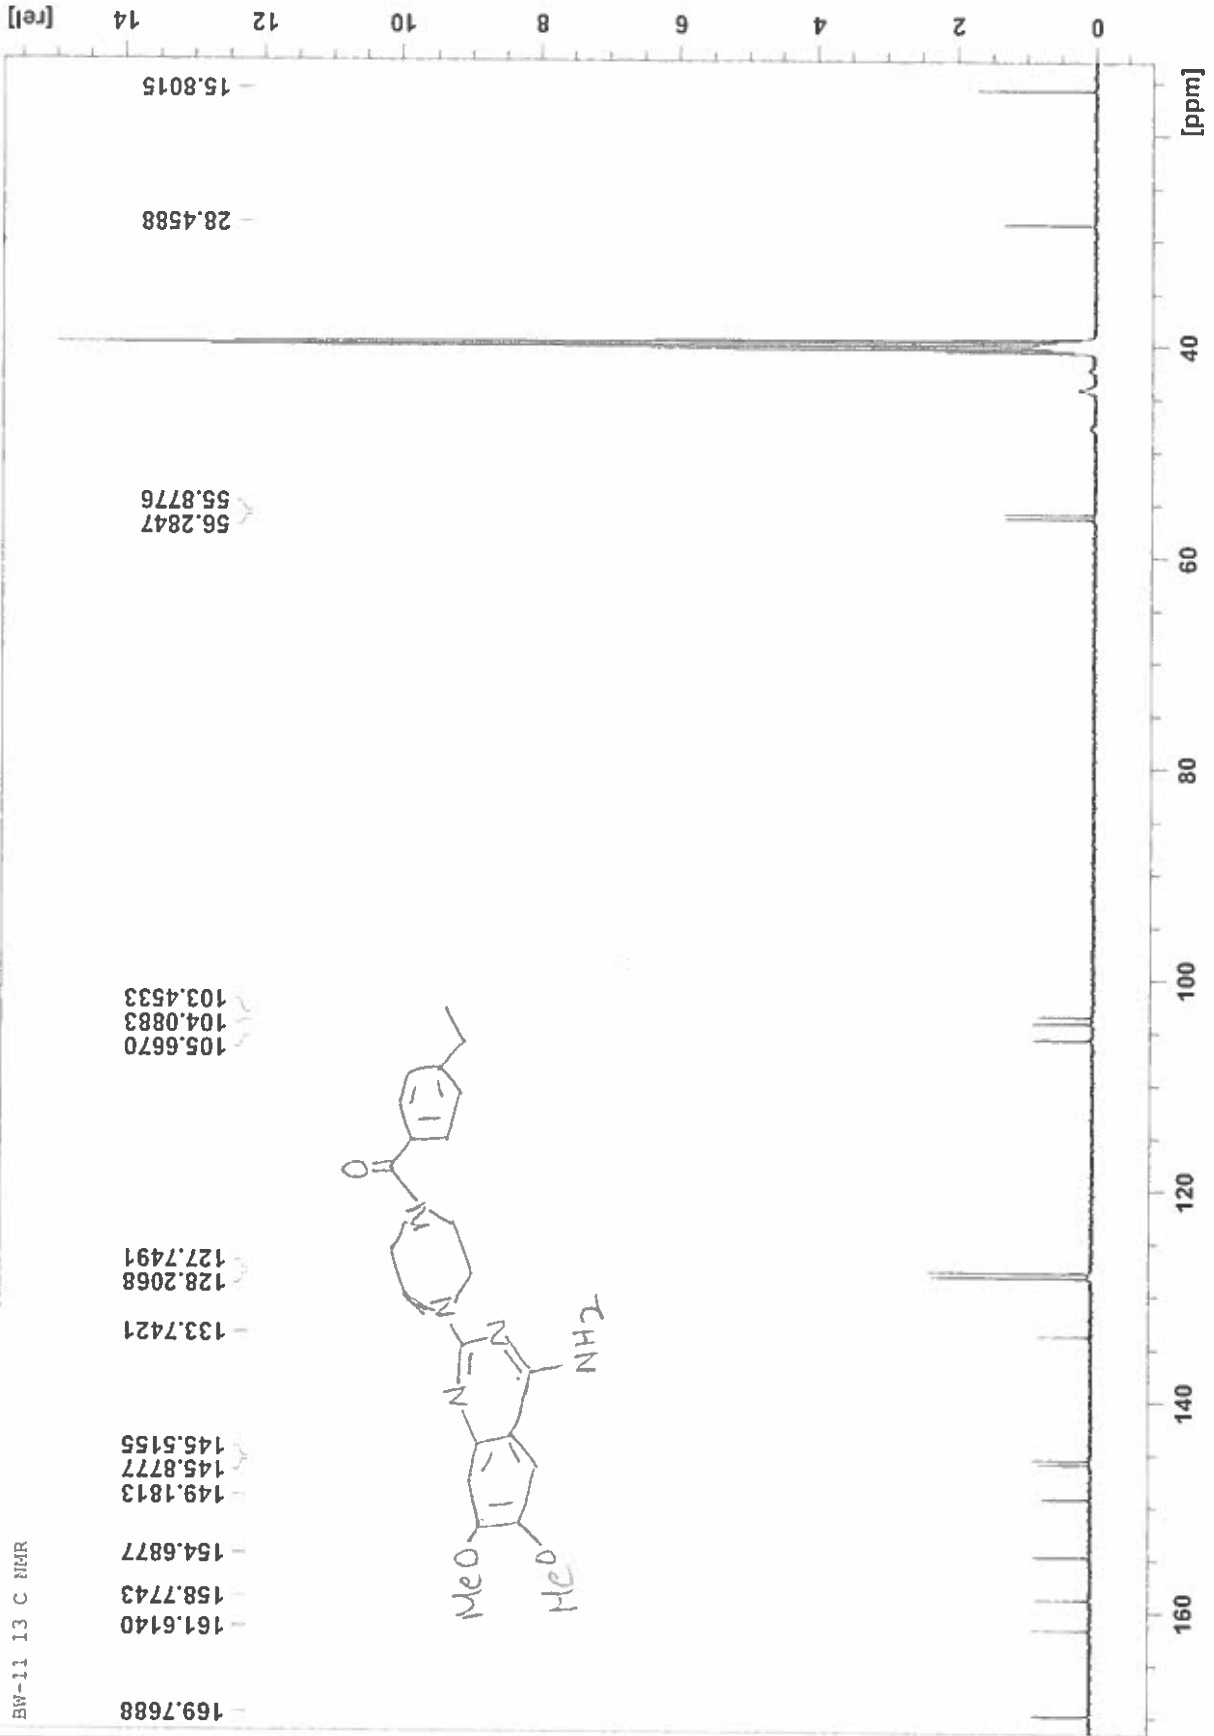

"BW 12 13C NMR" 1 1 "C:\Bruker\TopSpin3.2\viharika\bw compounds"

BW 12 13C NMR

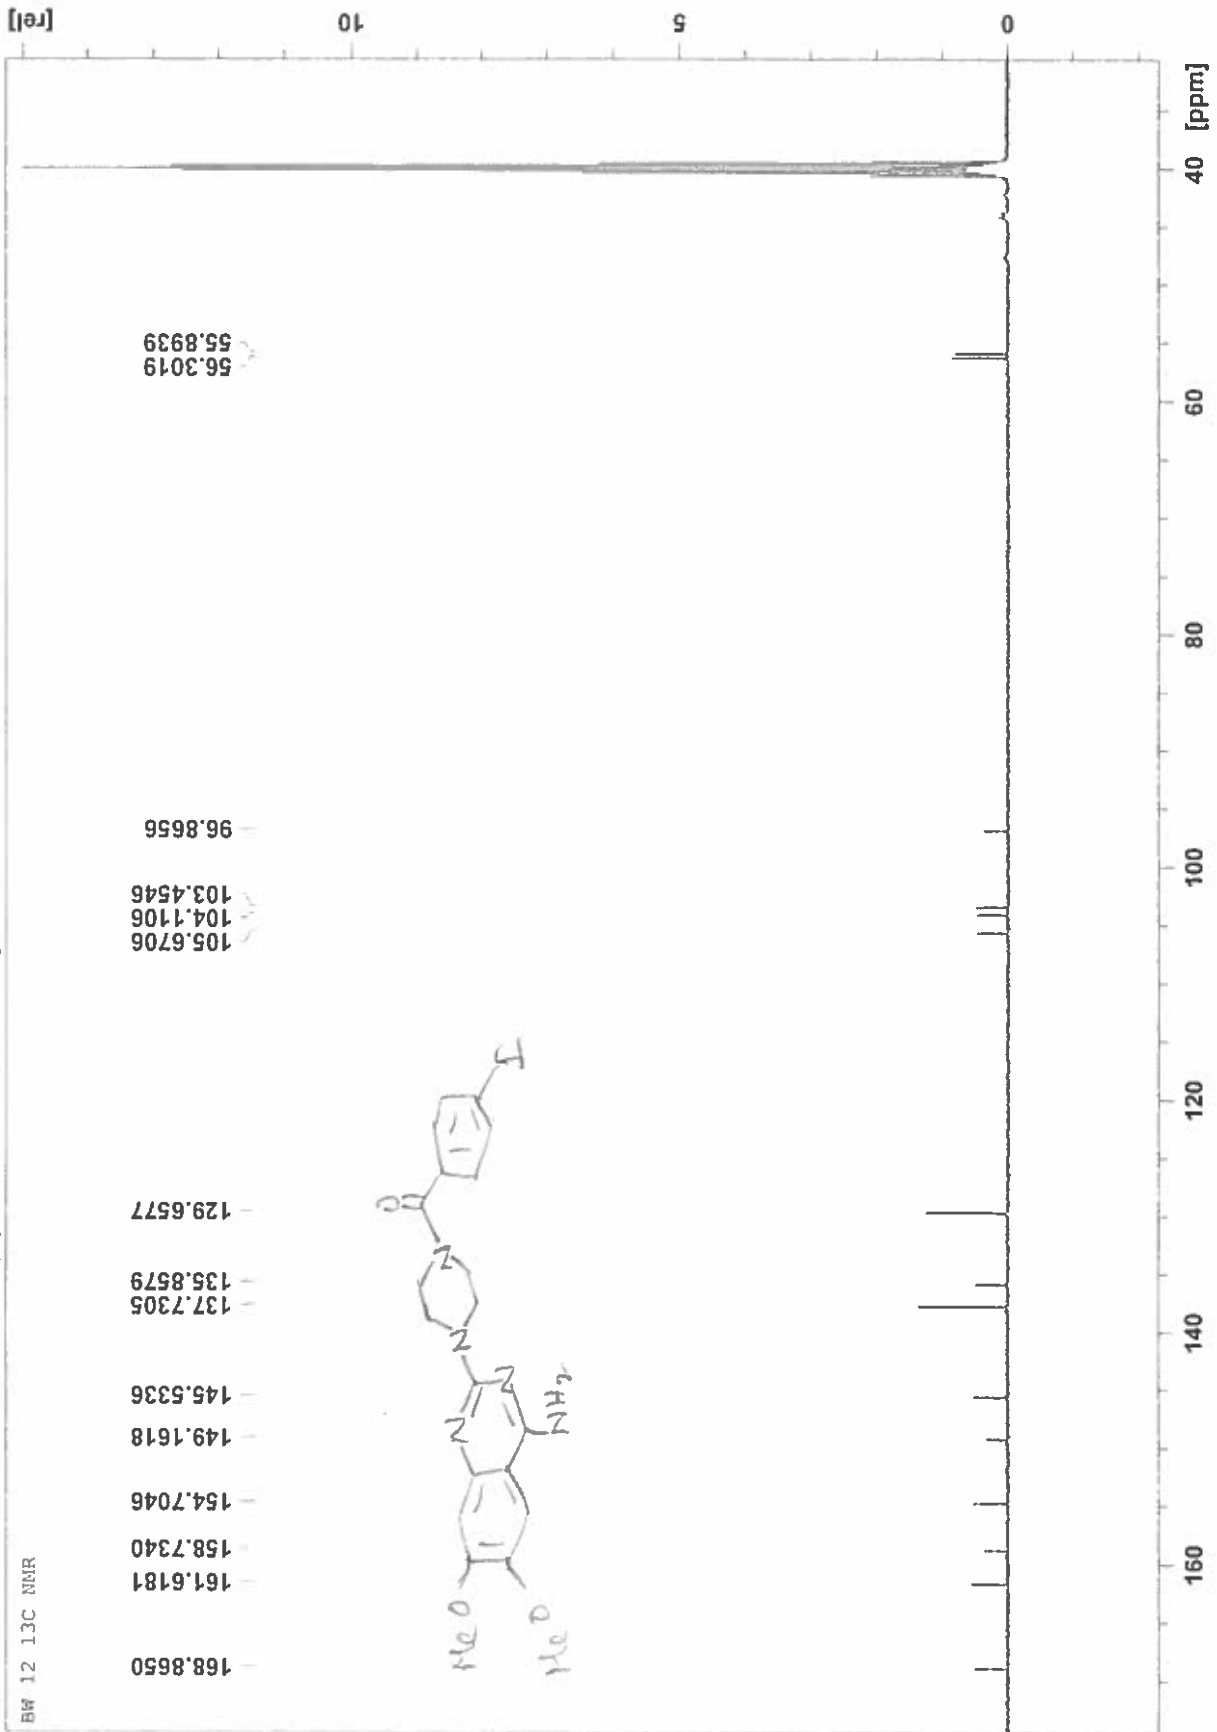

"BW 13 C13CPD" 1 1 "C:\Bruker\TopSpin3.2\viharika\bw compounds"

BW 13 C13CPD

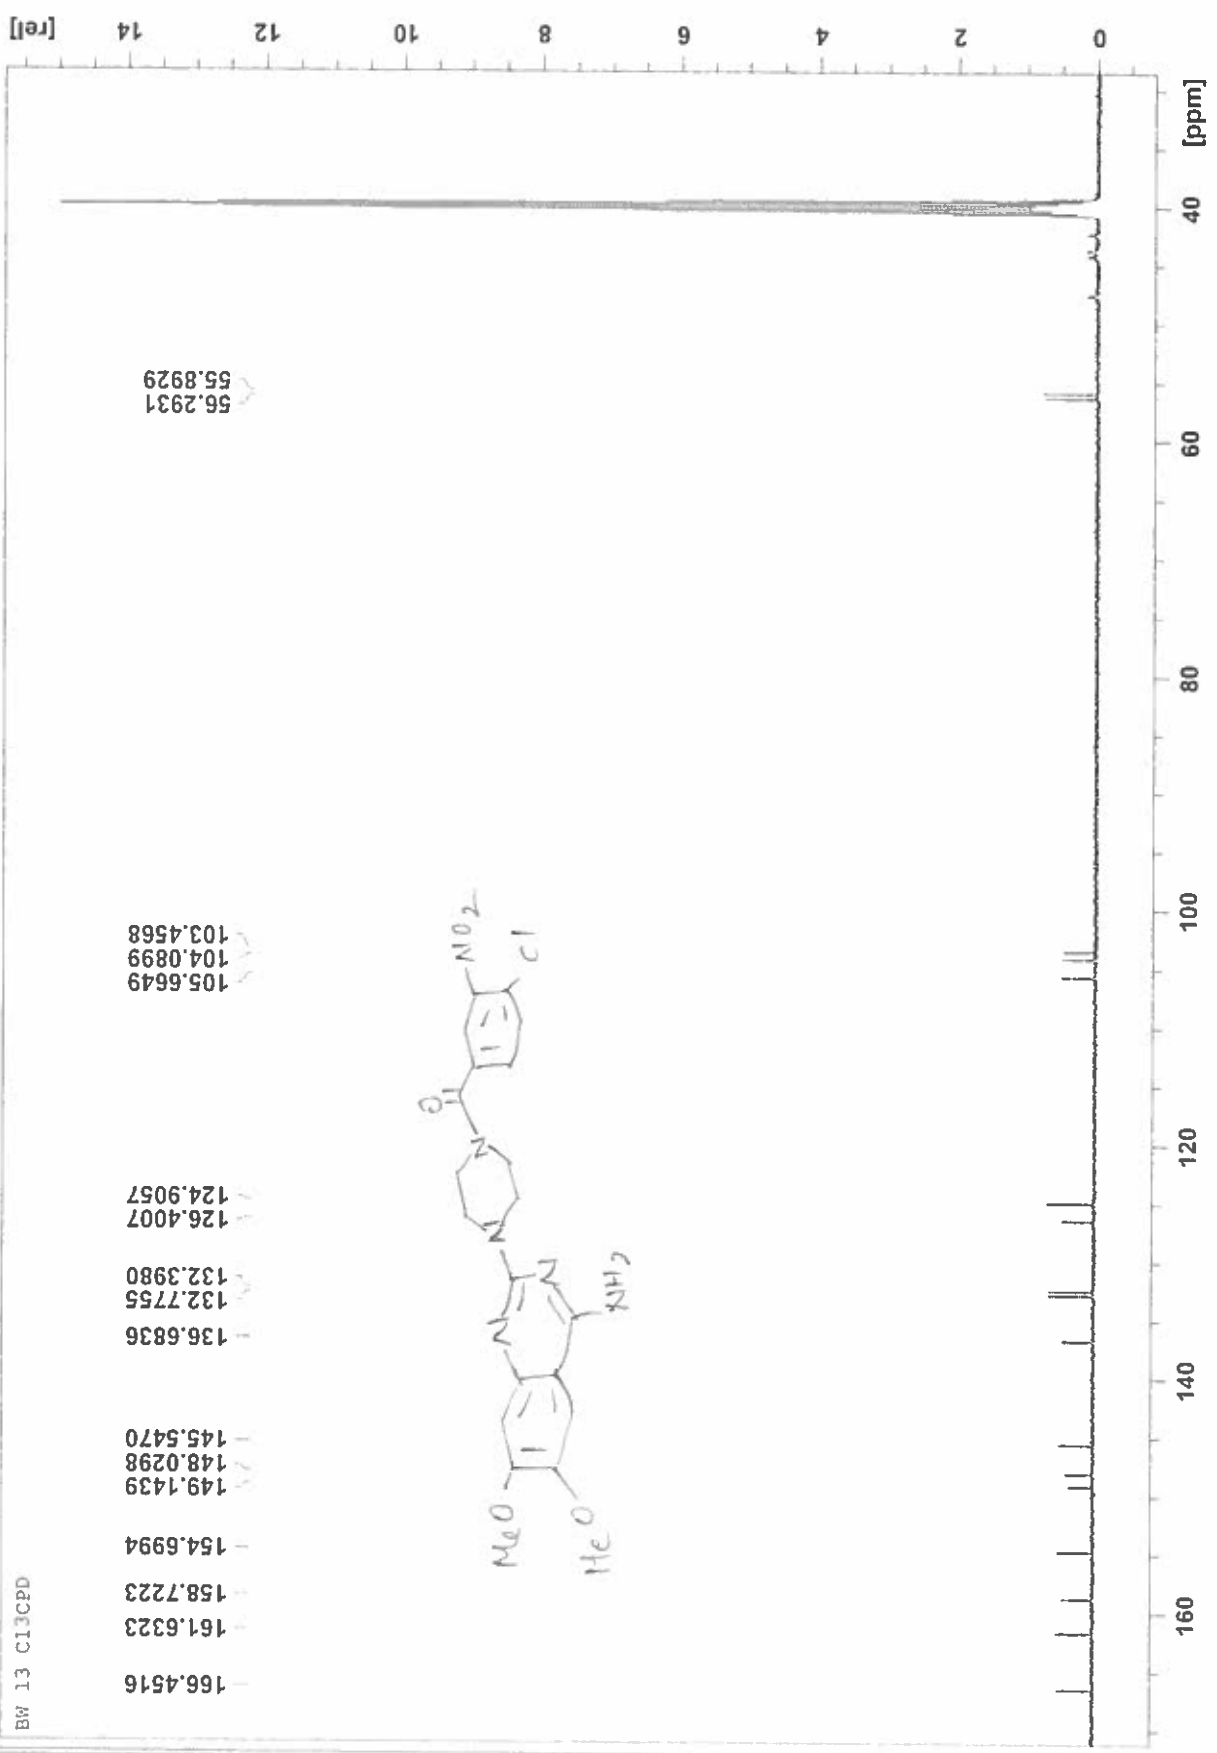

"BW 14 C13CPD 1 1 "C:\Bruker\TopSpin3.2\vihari.ka\bw compounds"

BW 14 C13CPD

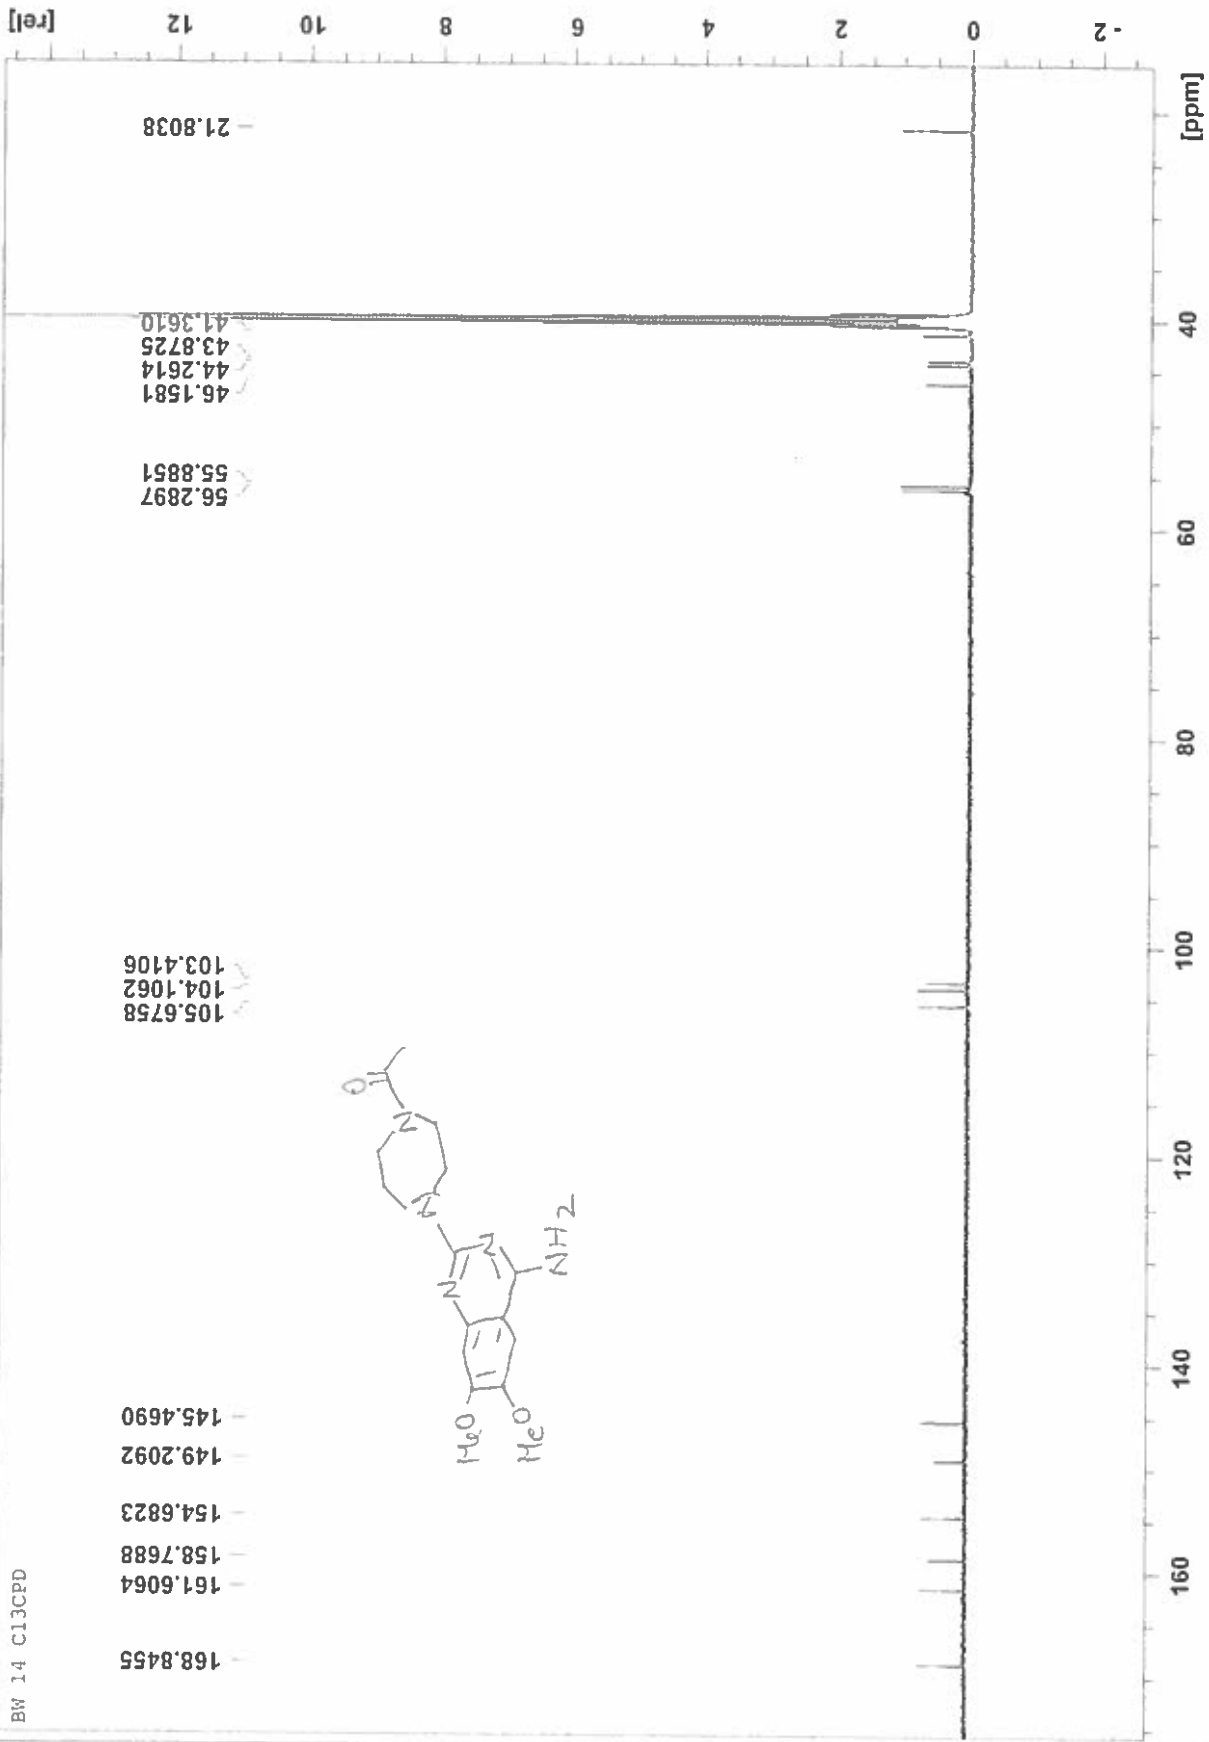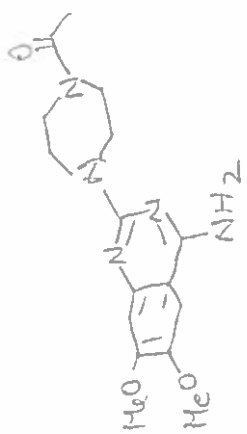



"BW 15 C13CPD" 2 2 "C:\Bruker\TopSpin3.2\vihariika\bw compounds"

BW 15 C13CPD

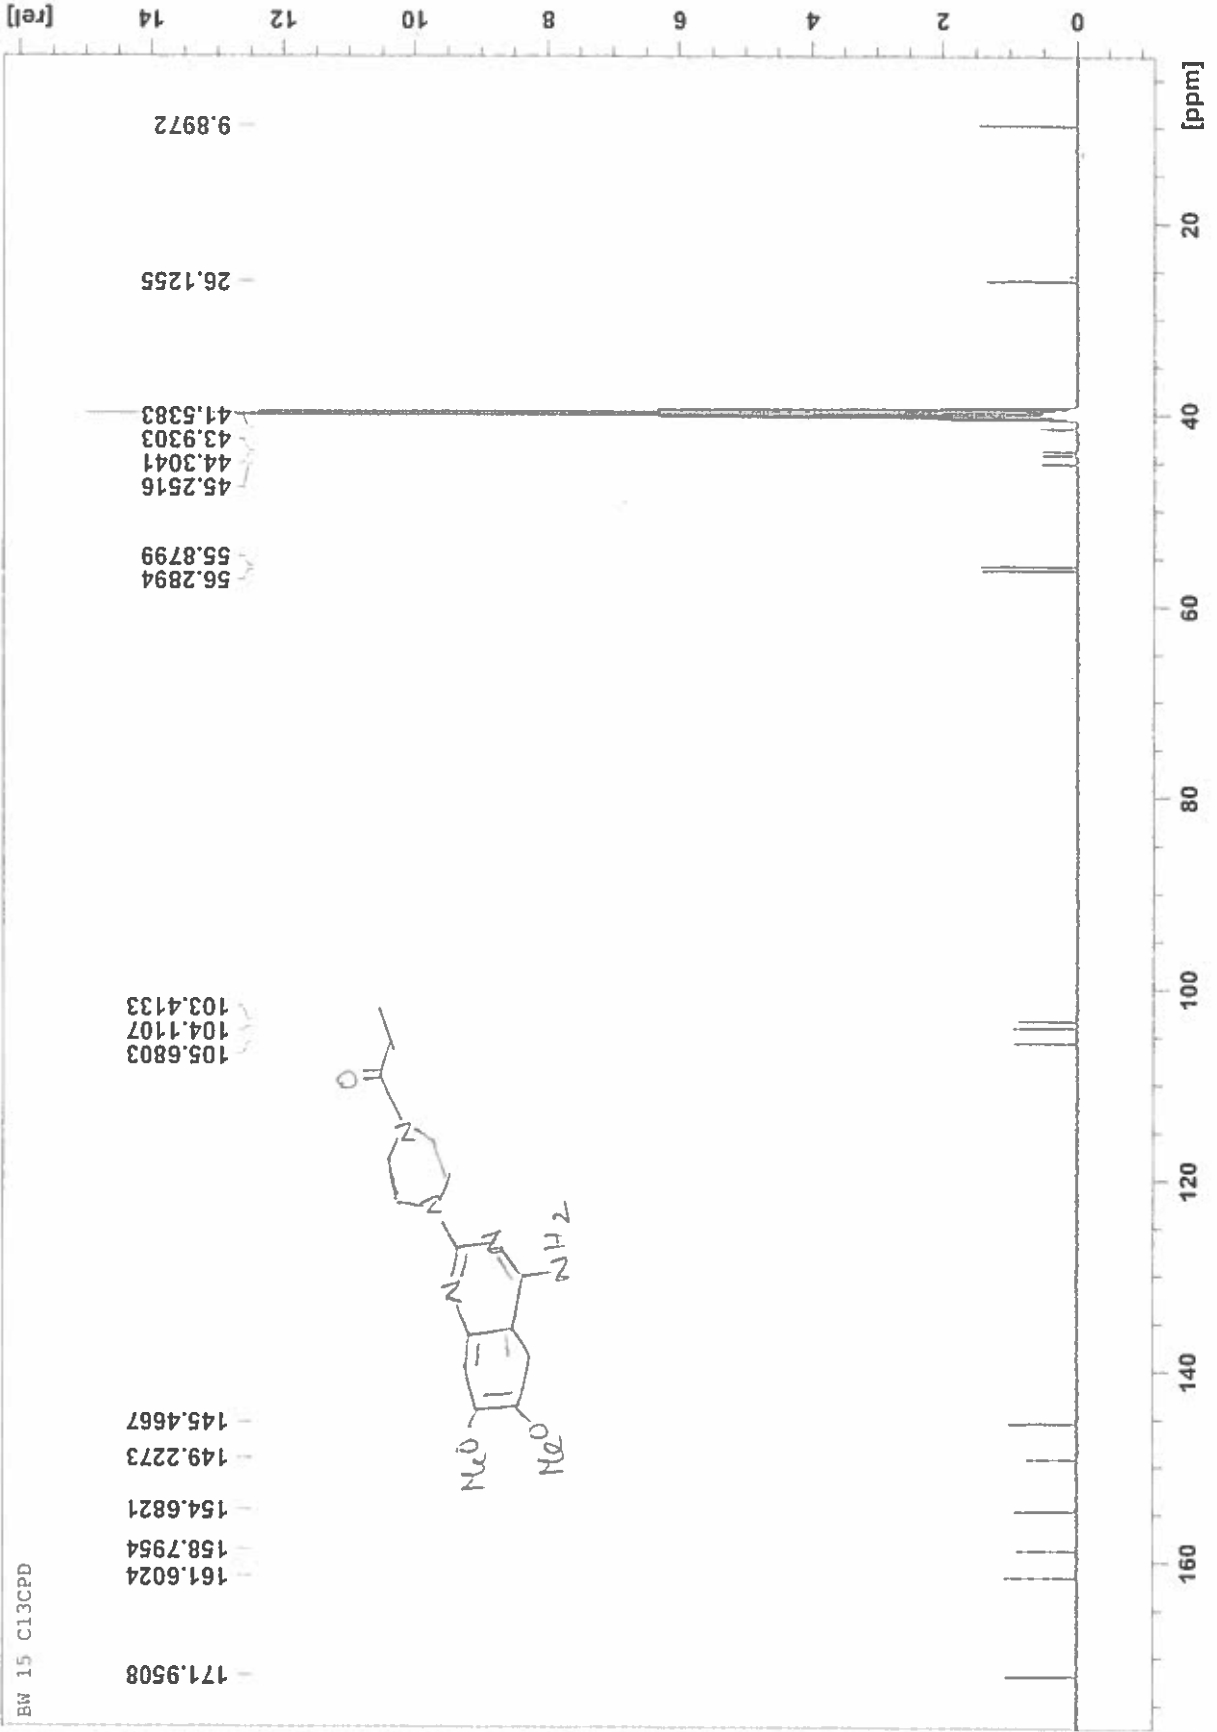

BW 16 C13CPD

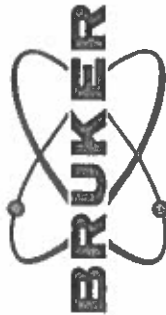

Current Data Parameters  
 NAME BW 16 C13CPD  
 EXPNO 2  
 PROCNO 2

F2 - Acquisition Parameters  
 Date\_ 20161006  
 Time 16.27  
 INSTRUM spect  
 PROBHD 5 mm PABBO BB/  
 PULPROG zgpg30  
 TD 65536  
 SOLVENT DMSO  
 NS 1024  
 DS 4  
 SWH 24038.461 Hz  
 FIDRES 0.366798 Hz  
 AQ 1.3631488 sec  
 RG 195.78  
 DW 20.800 usec  
 DE 6.50 usec  
 TE 298.8 K  
 D1 2.0000000 sec  
 D11 0.0300000 sec  
 TDO 1

==== CHANNEL f1 =====  
 SFO1 100.6228293 MHz  
 NUC1 13C  
 P1 10.00 usec  
 PLW1 68.00000000 W

==== CHANNEL f2 =====  
 SFO2 400.1316005 MHz  
 NUC2 1H  
 CPDPRG[2] waltz16  
 PCPD2 90.00 usec  
 PLW2 15.69999981 W  
 PLW12 0.19383000 W  
 PLW13 0.15700001 W

F2 - Processing parameters  
 SI 32768  
 SF 100.6127685 MHz  
 WDW EM  
 SSB 0  
 LB 0  
 GB 0  
 PC 1.40

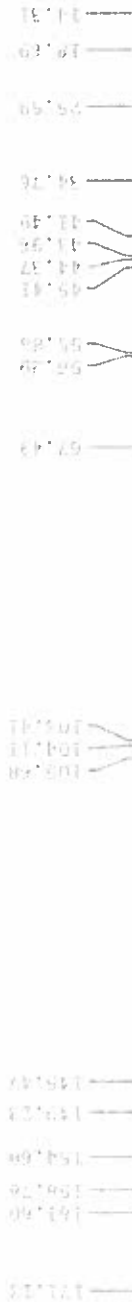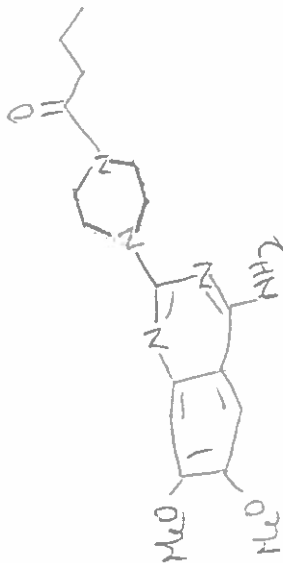

170 160 150 140 130 120 110 100 90 80 70 60 50 40 30 20 ppm

"BW 17 C13CPD" 1 1 "C:\Bruker\TopSpin3.2\vihatika\bw compounds"

BW 17 C13CPD

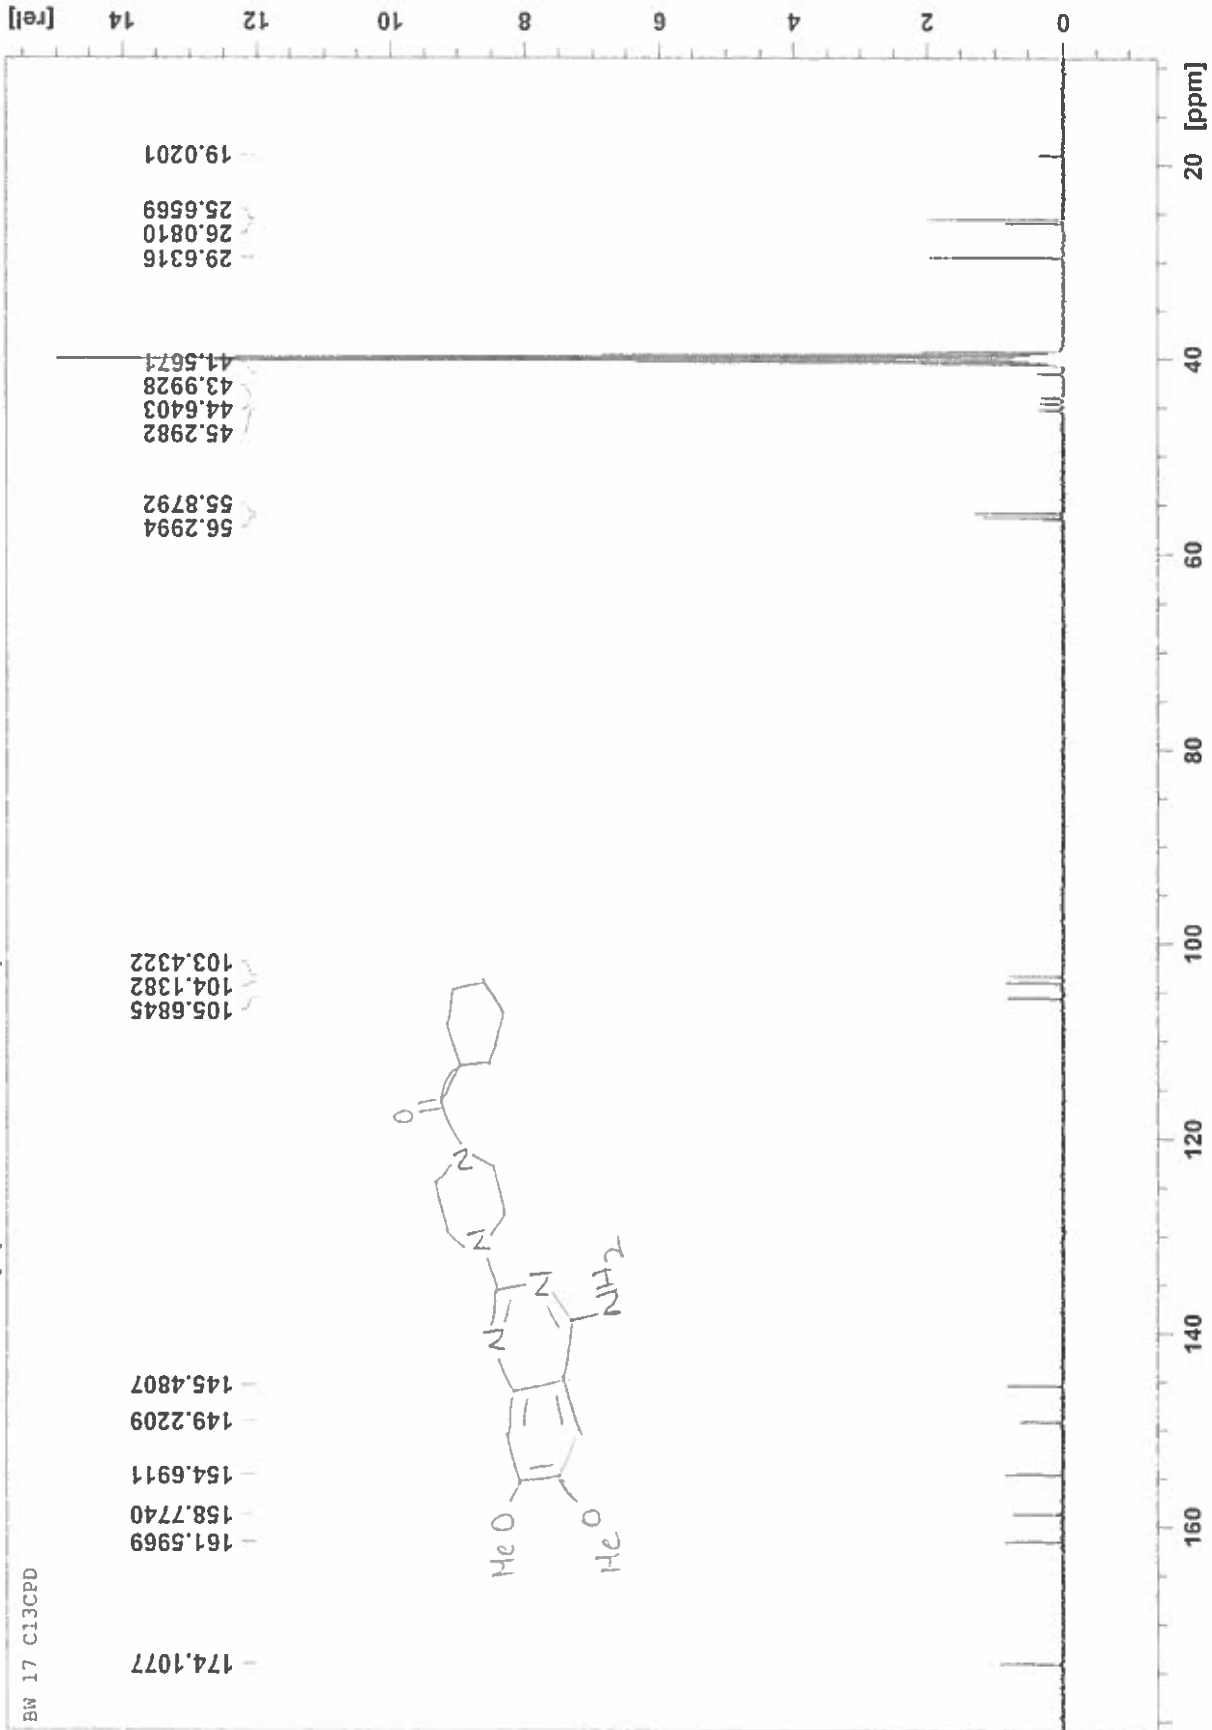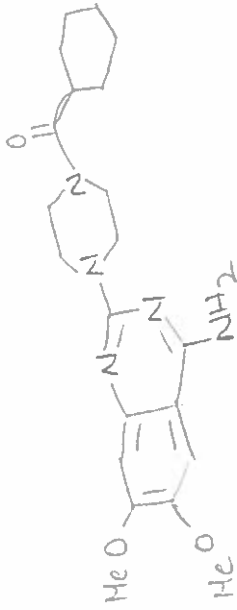

"BW 18 C13CPD" 1 1 "C:\Bruker\TopSpin3.2\viharika\bw compounds"

BW 18 C13CPD

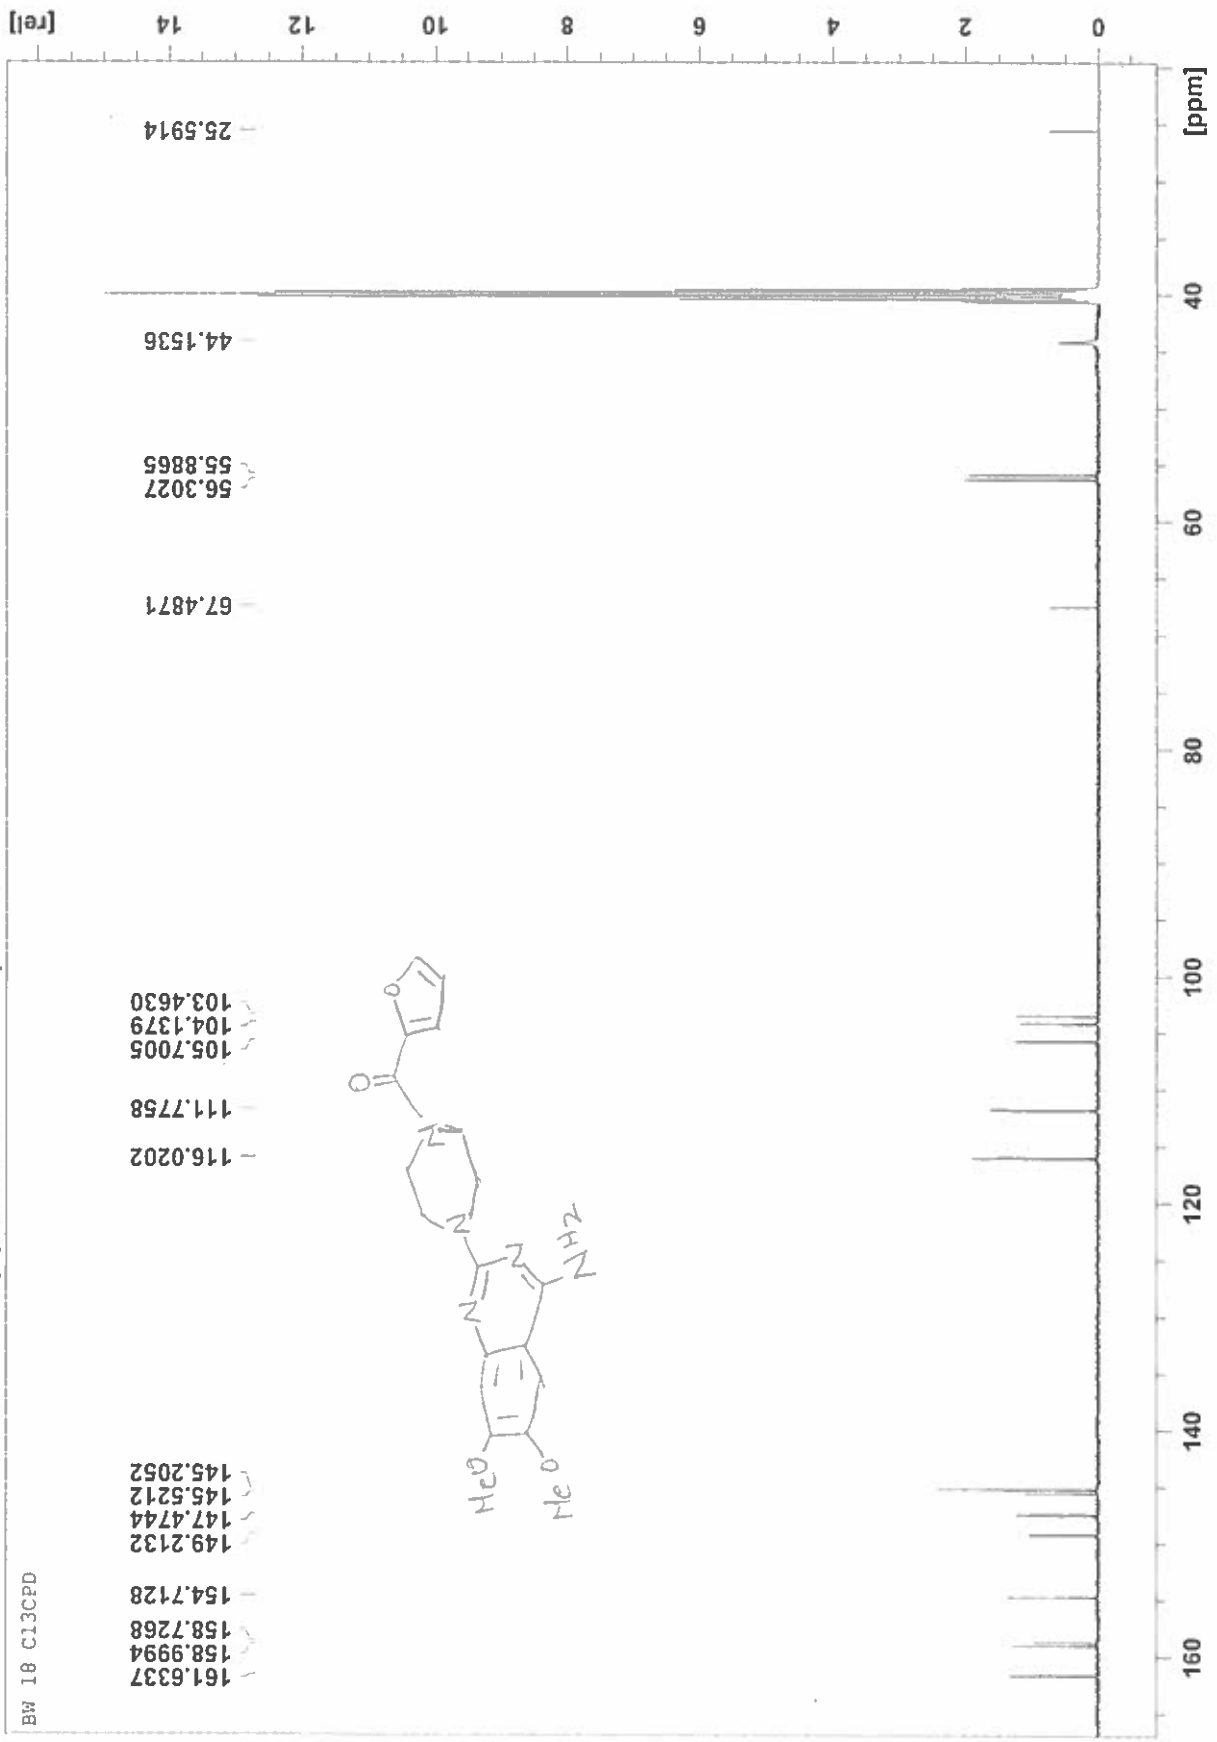

"BW 19 C13CPD" 1 1 "C:\Bruker\TopSpin3.2\viharika\bw compounds"

BW 19 C13CPD

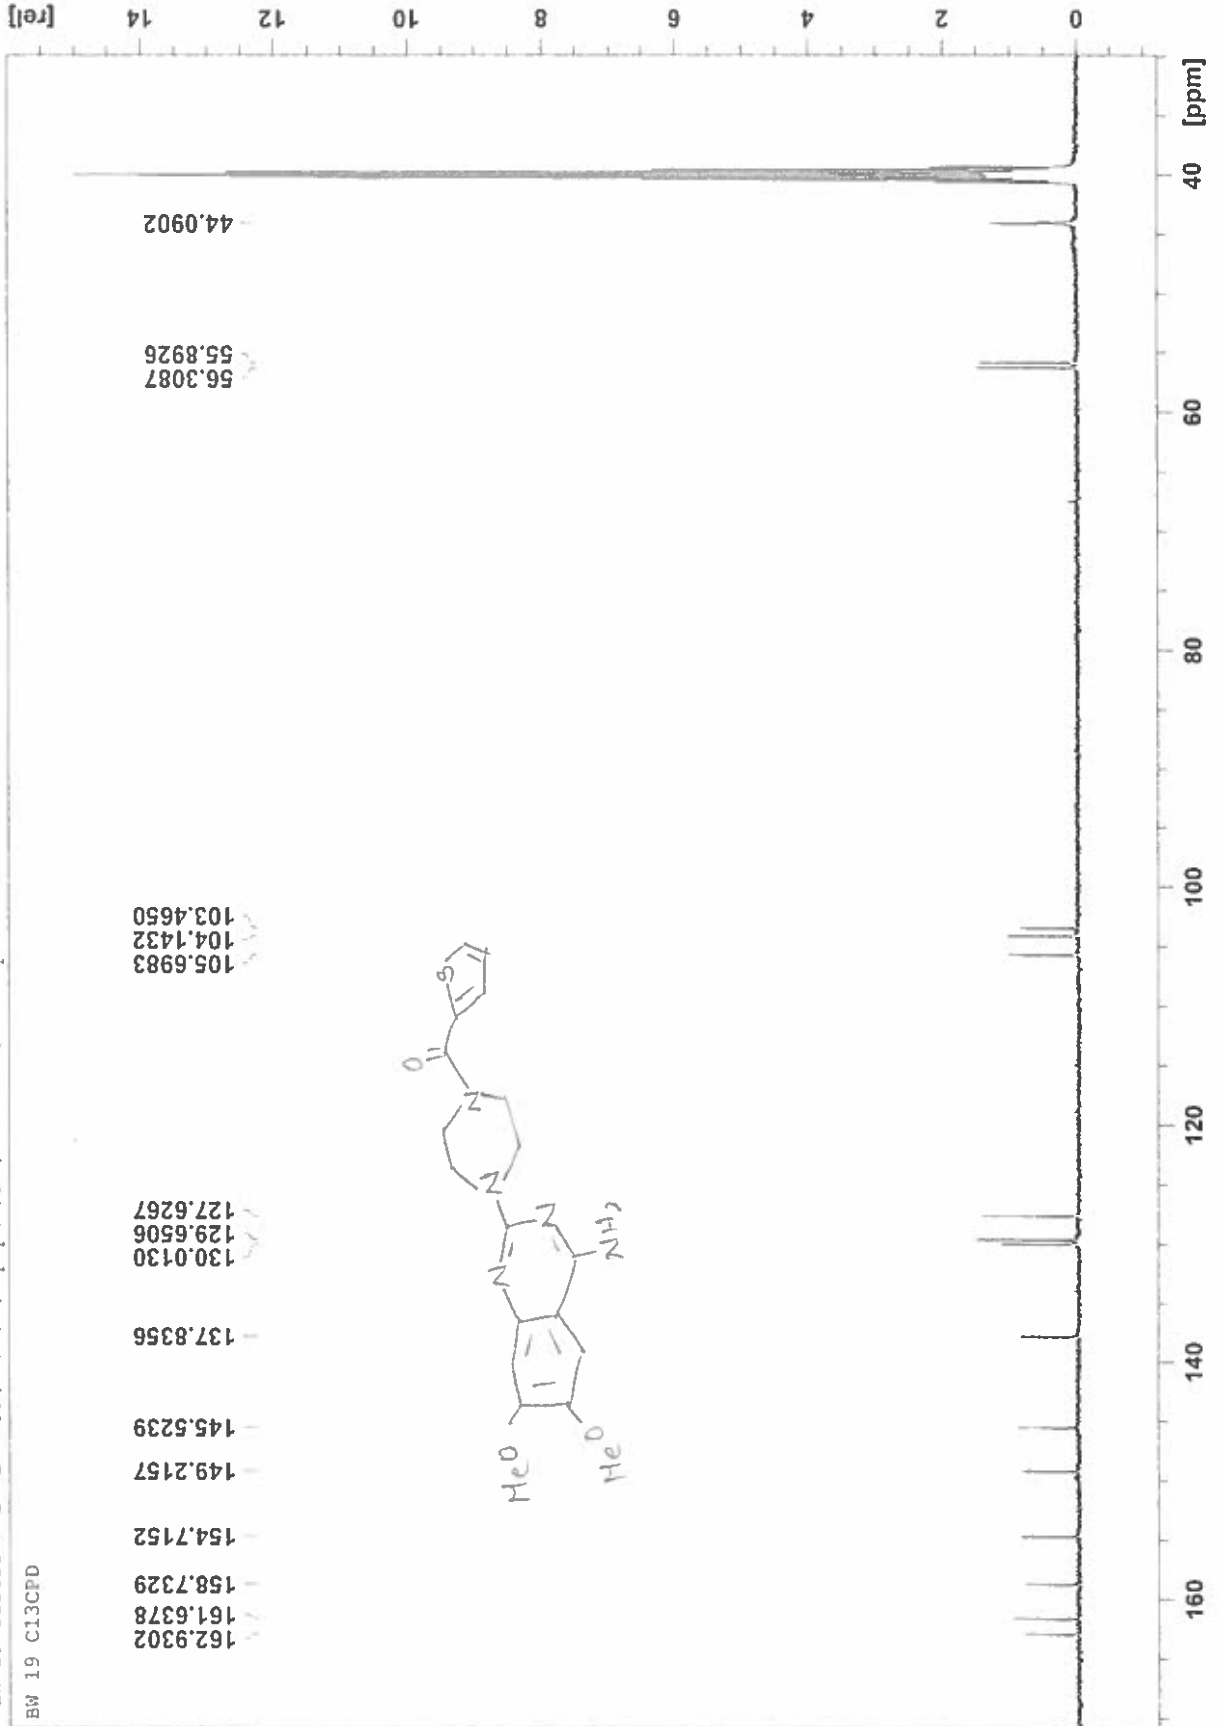

"BW 20 13C NMR" 1 1 "C:\Bruker\TopSpin3.2\viharika\bw compounds"

BW 20 13C NMR

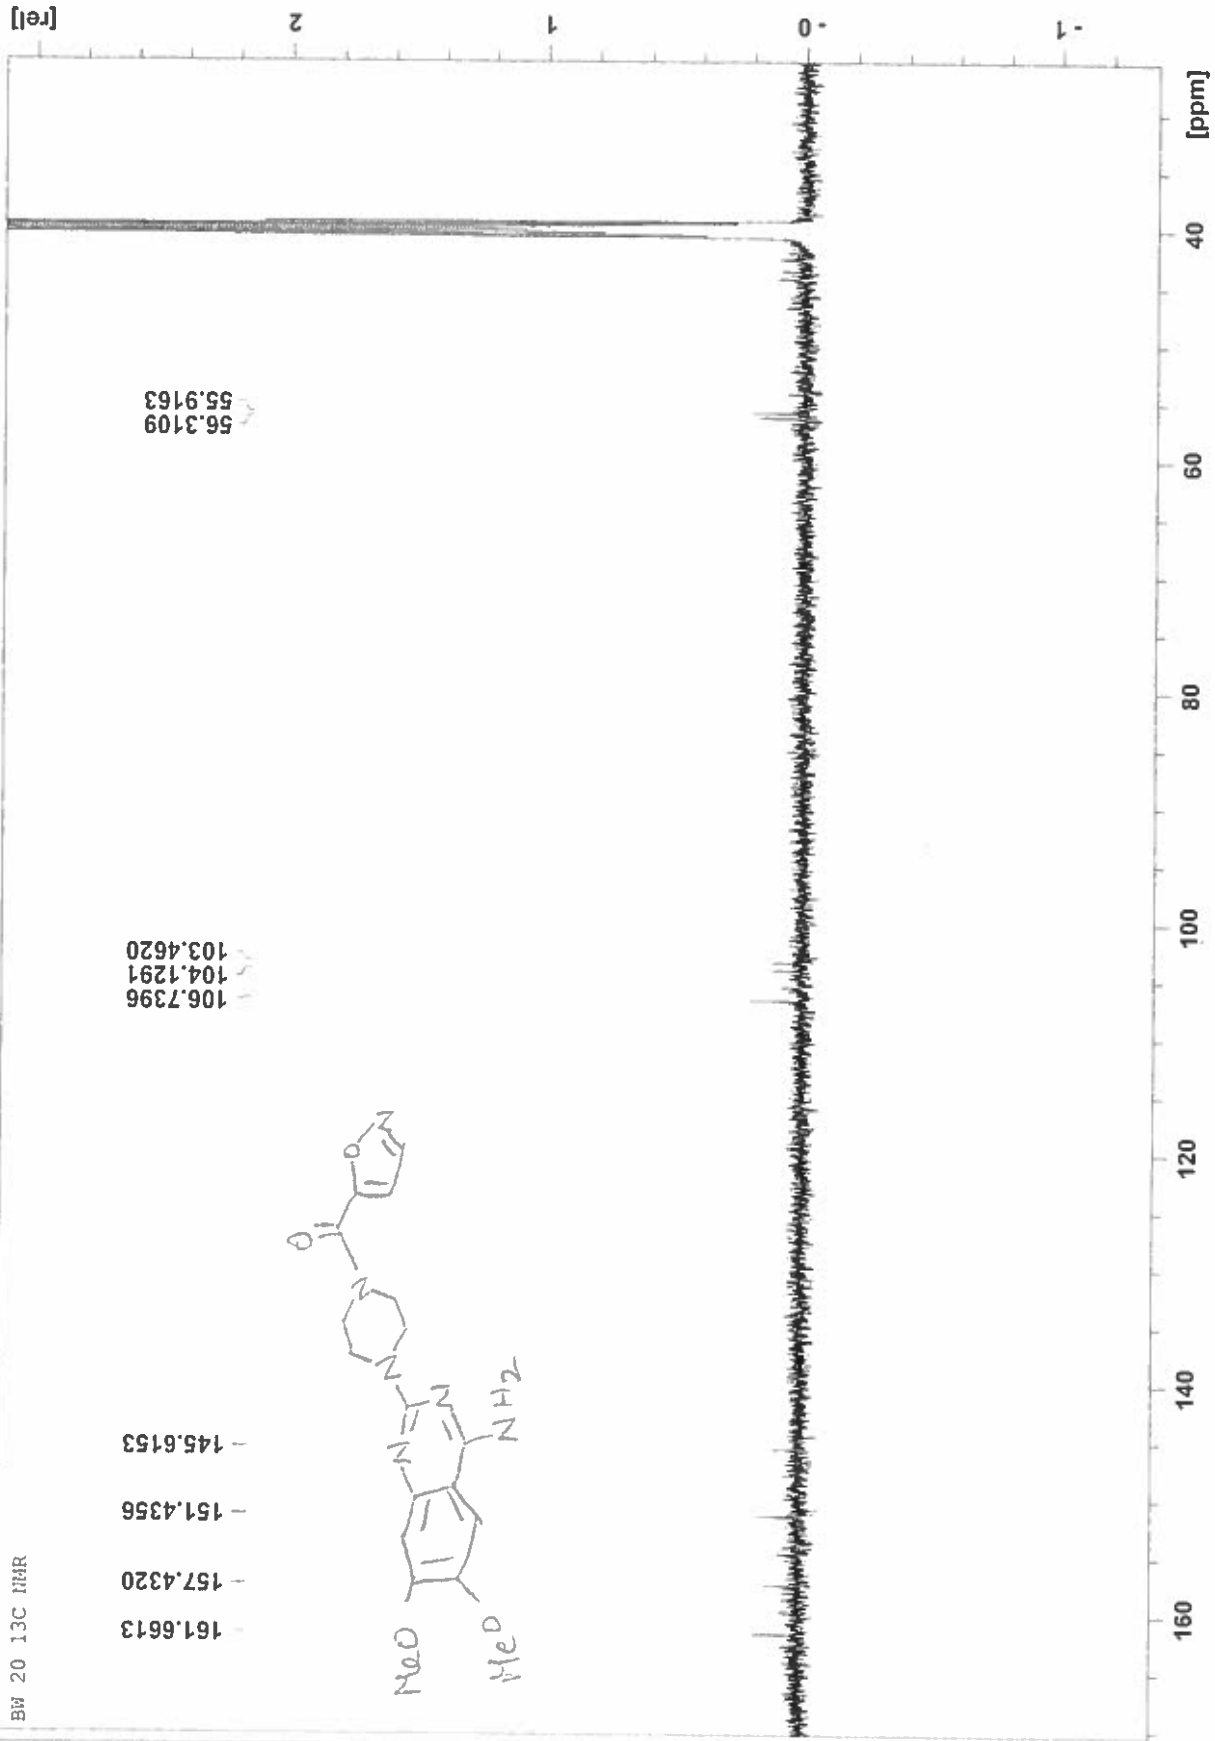

"BW 21 C13CPD" 1 1 "C:\Bruker\TopSpin3.2\viharika\bw compounds"

BW 21 C13CPD

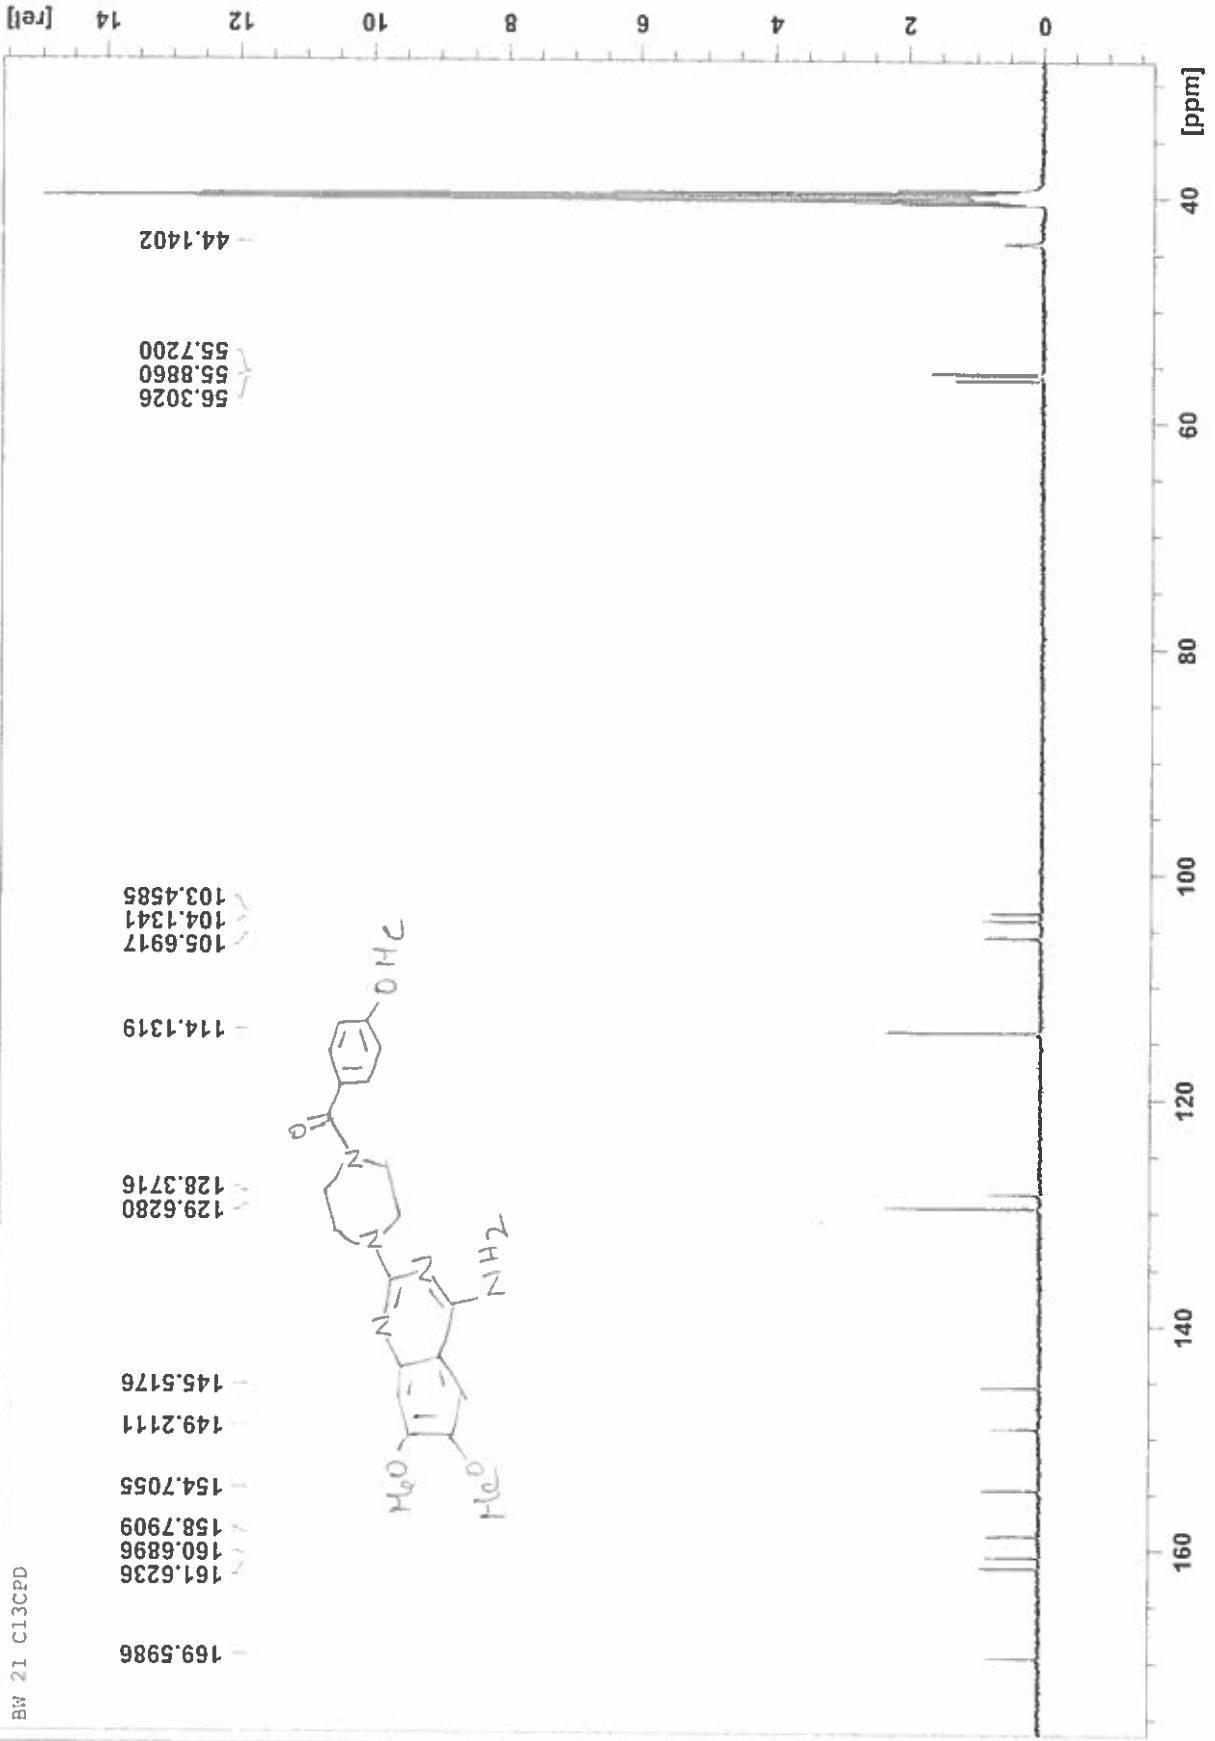

"BW 22 13C NMR" 1 1 "C:\Bruker\TopSpin3.2\viharika\bw compounds"

BW 22 13C NMR

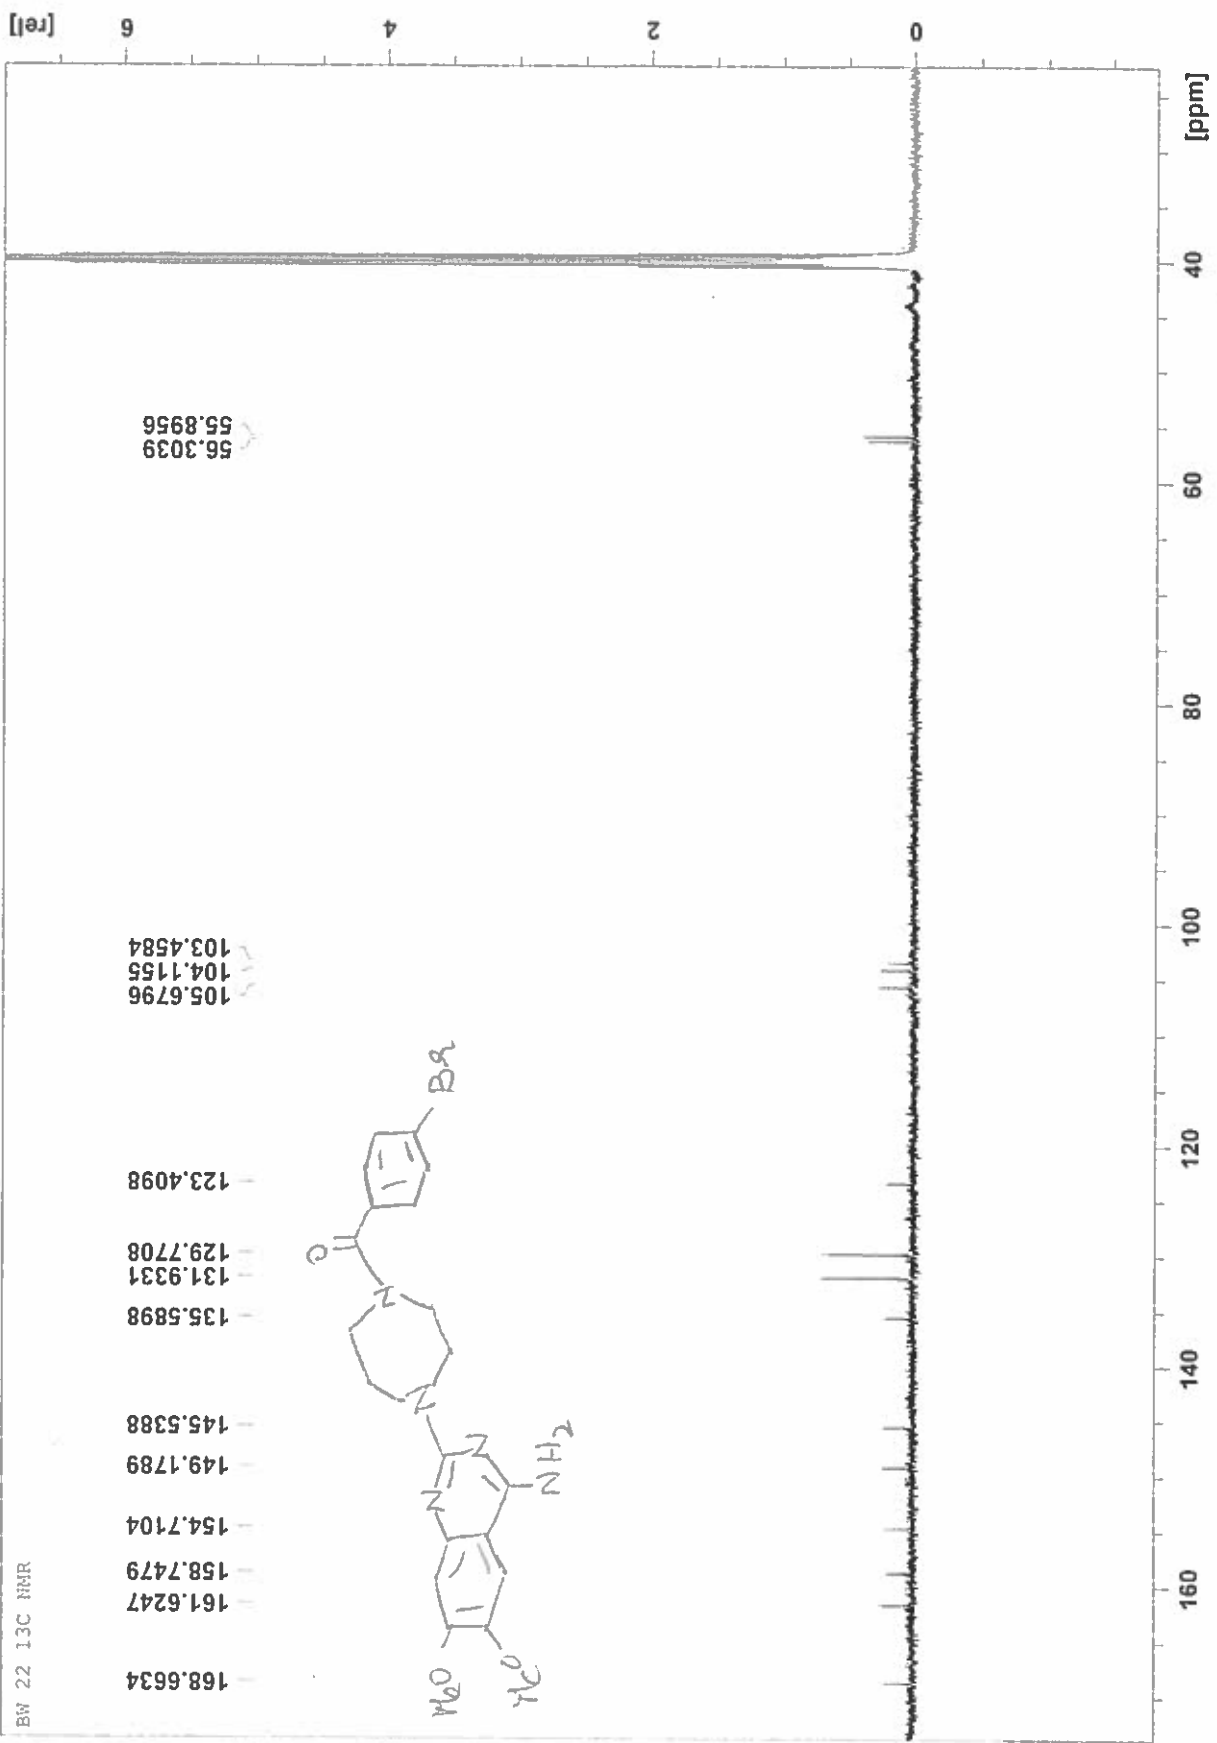



"BW 23 13C NMR" 1 1 "C:\Bruker\TopSpin3.2\viharika\bw compounds"

BW 23 13C NMR

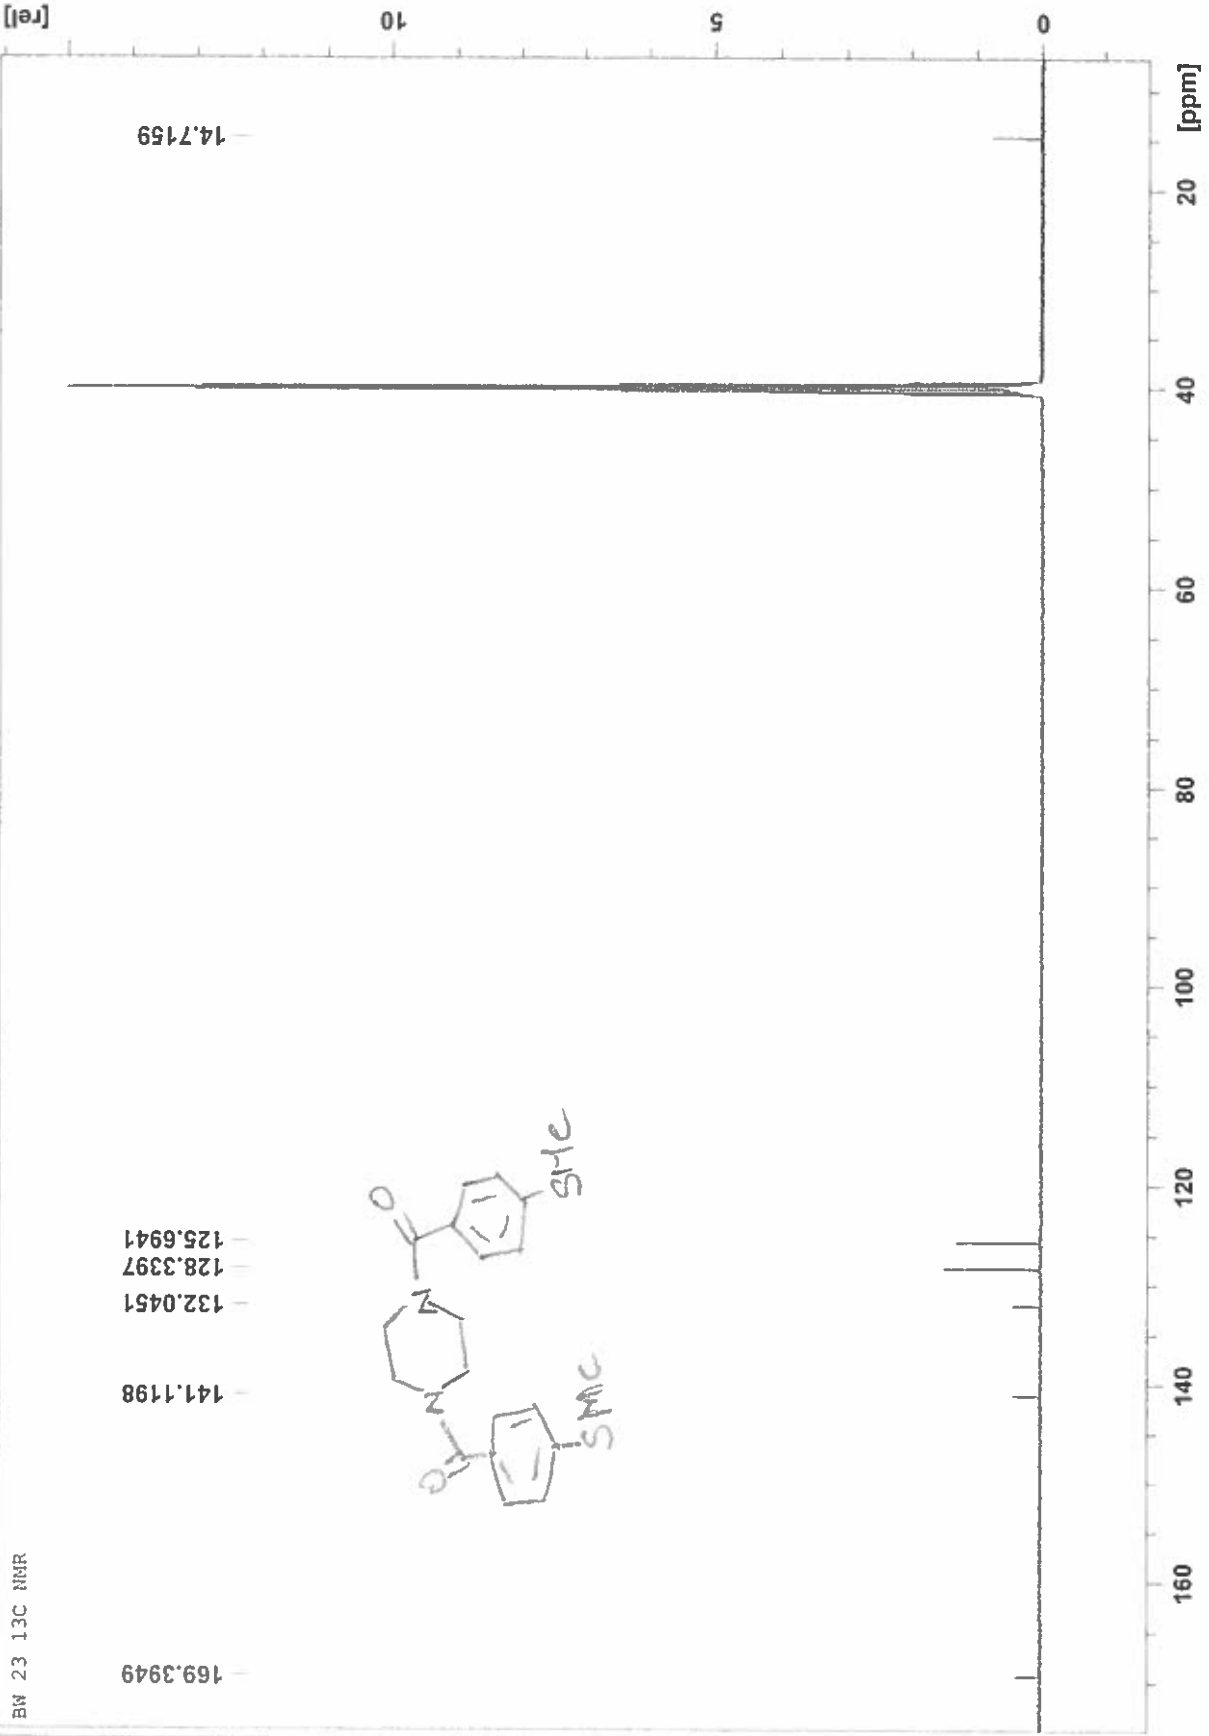

[rel]

[ppm]

"BW 24 13C NMR" 1 1 "C:\Bruker\TopSpin3.2\viharika\bw compounds"

BW 24 13C NMR

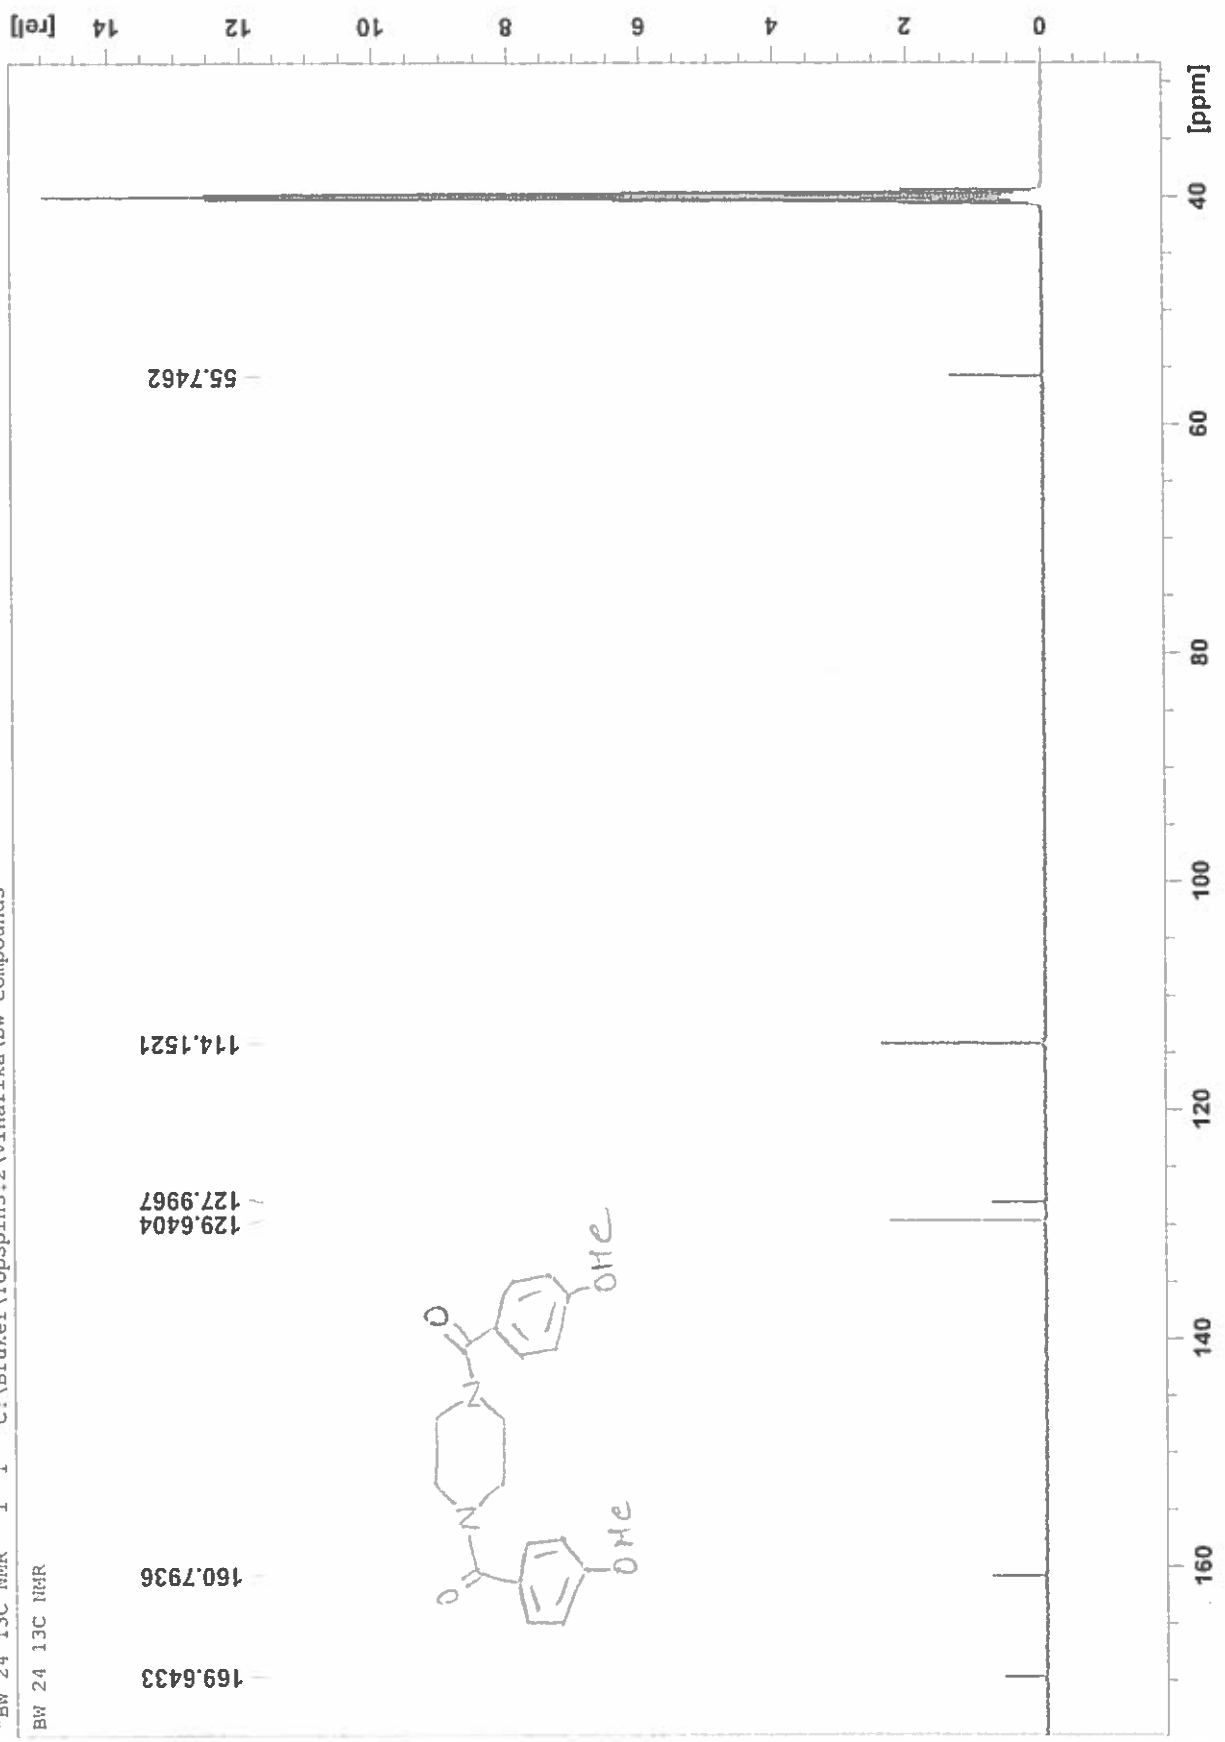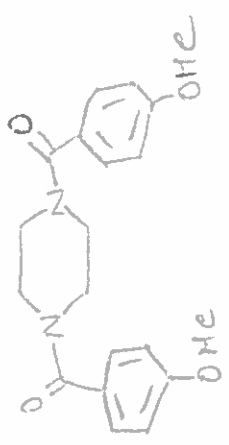

"BW 25 C13CPD" 1 1 "C:\Bruker\TopSpin3.2\viharika\bw compounds"  
BW 25 C13CPD

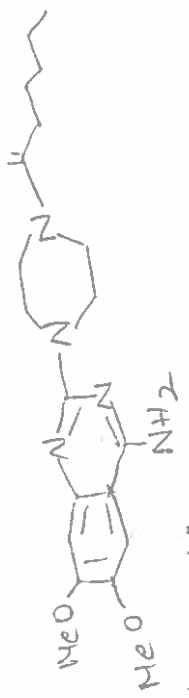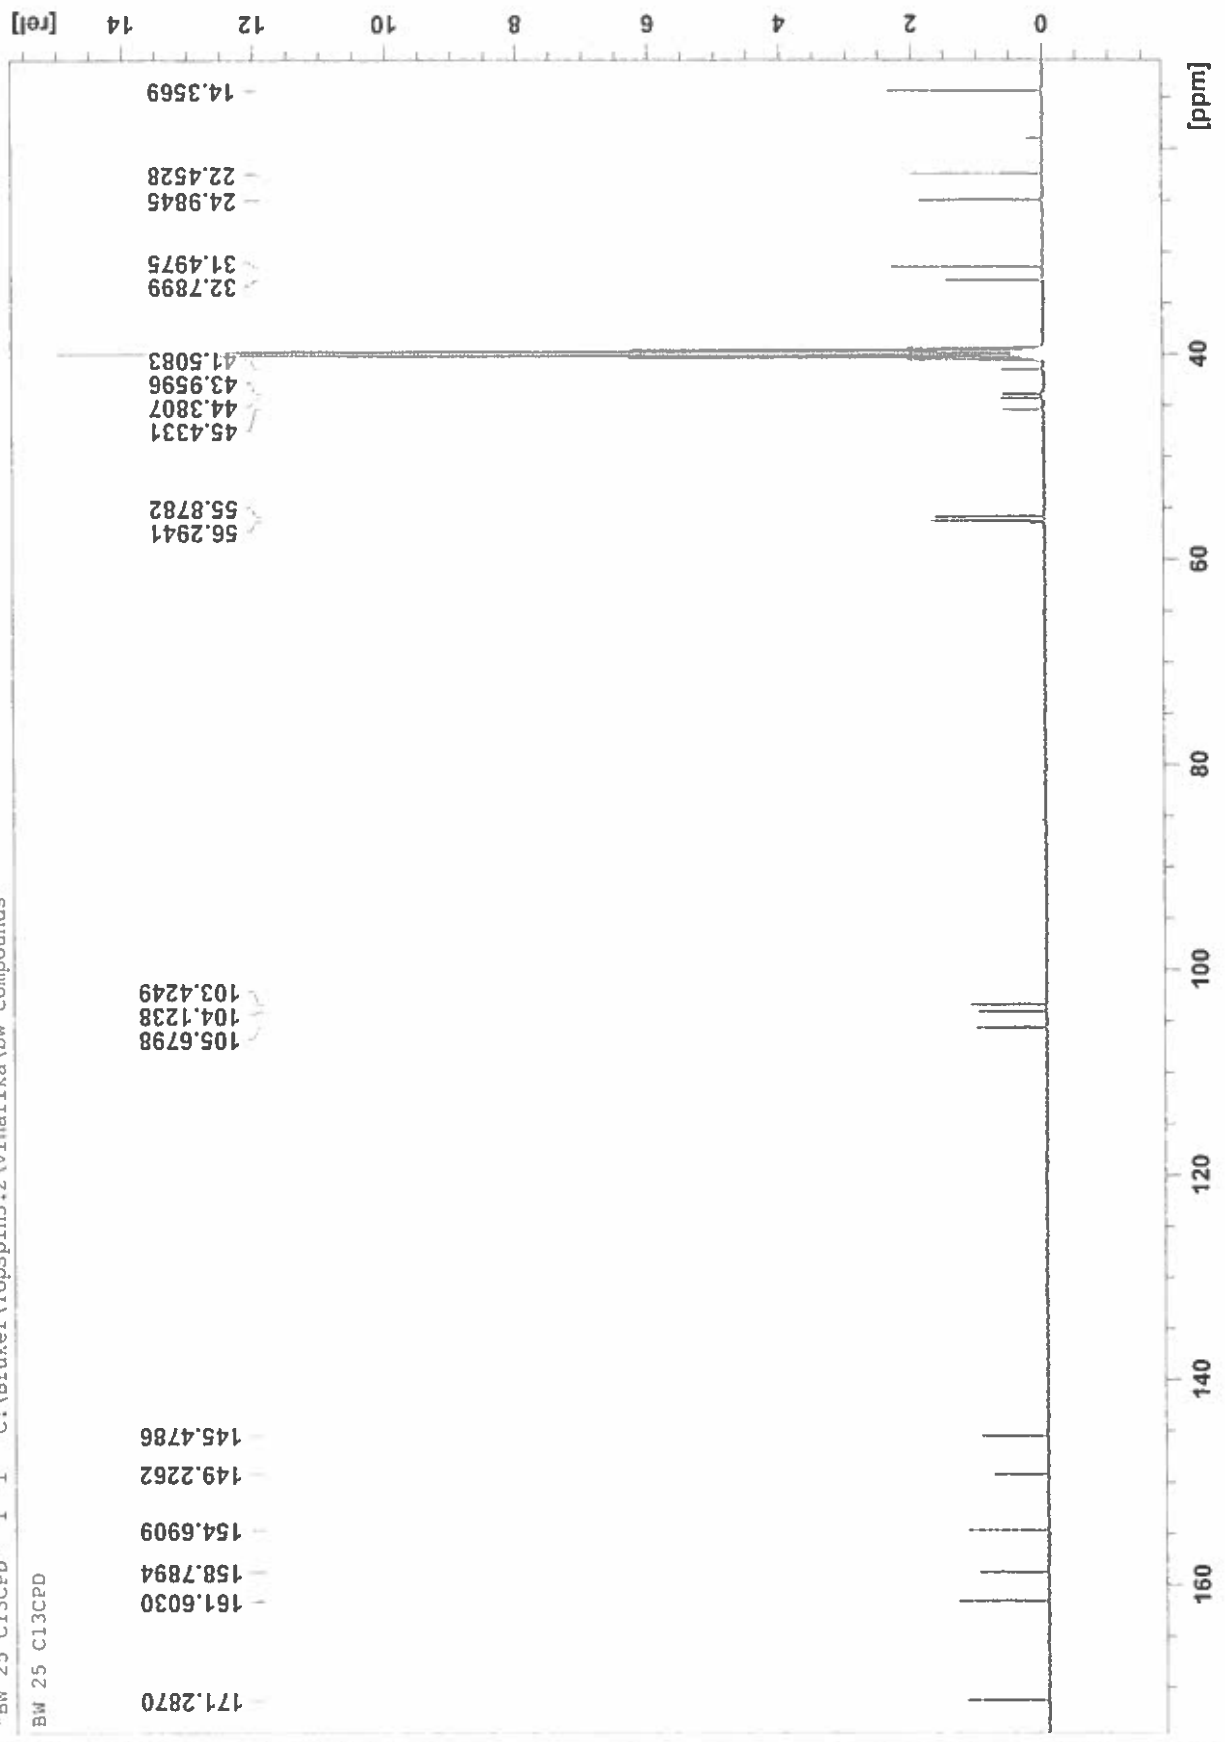

"BW 29 C13CPD" 3 3 "C:\Bruker\TopSpin3.2\viharika\bw compounds"

BW 29 C13CPD

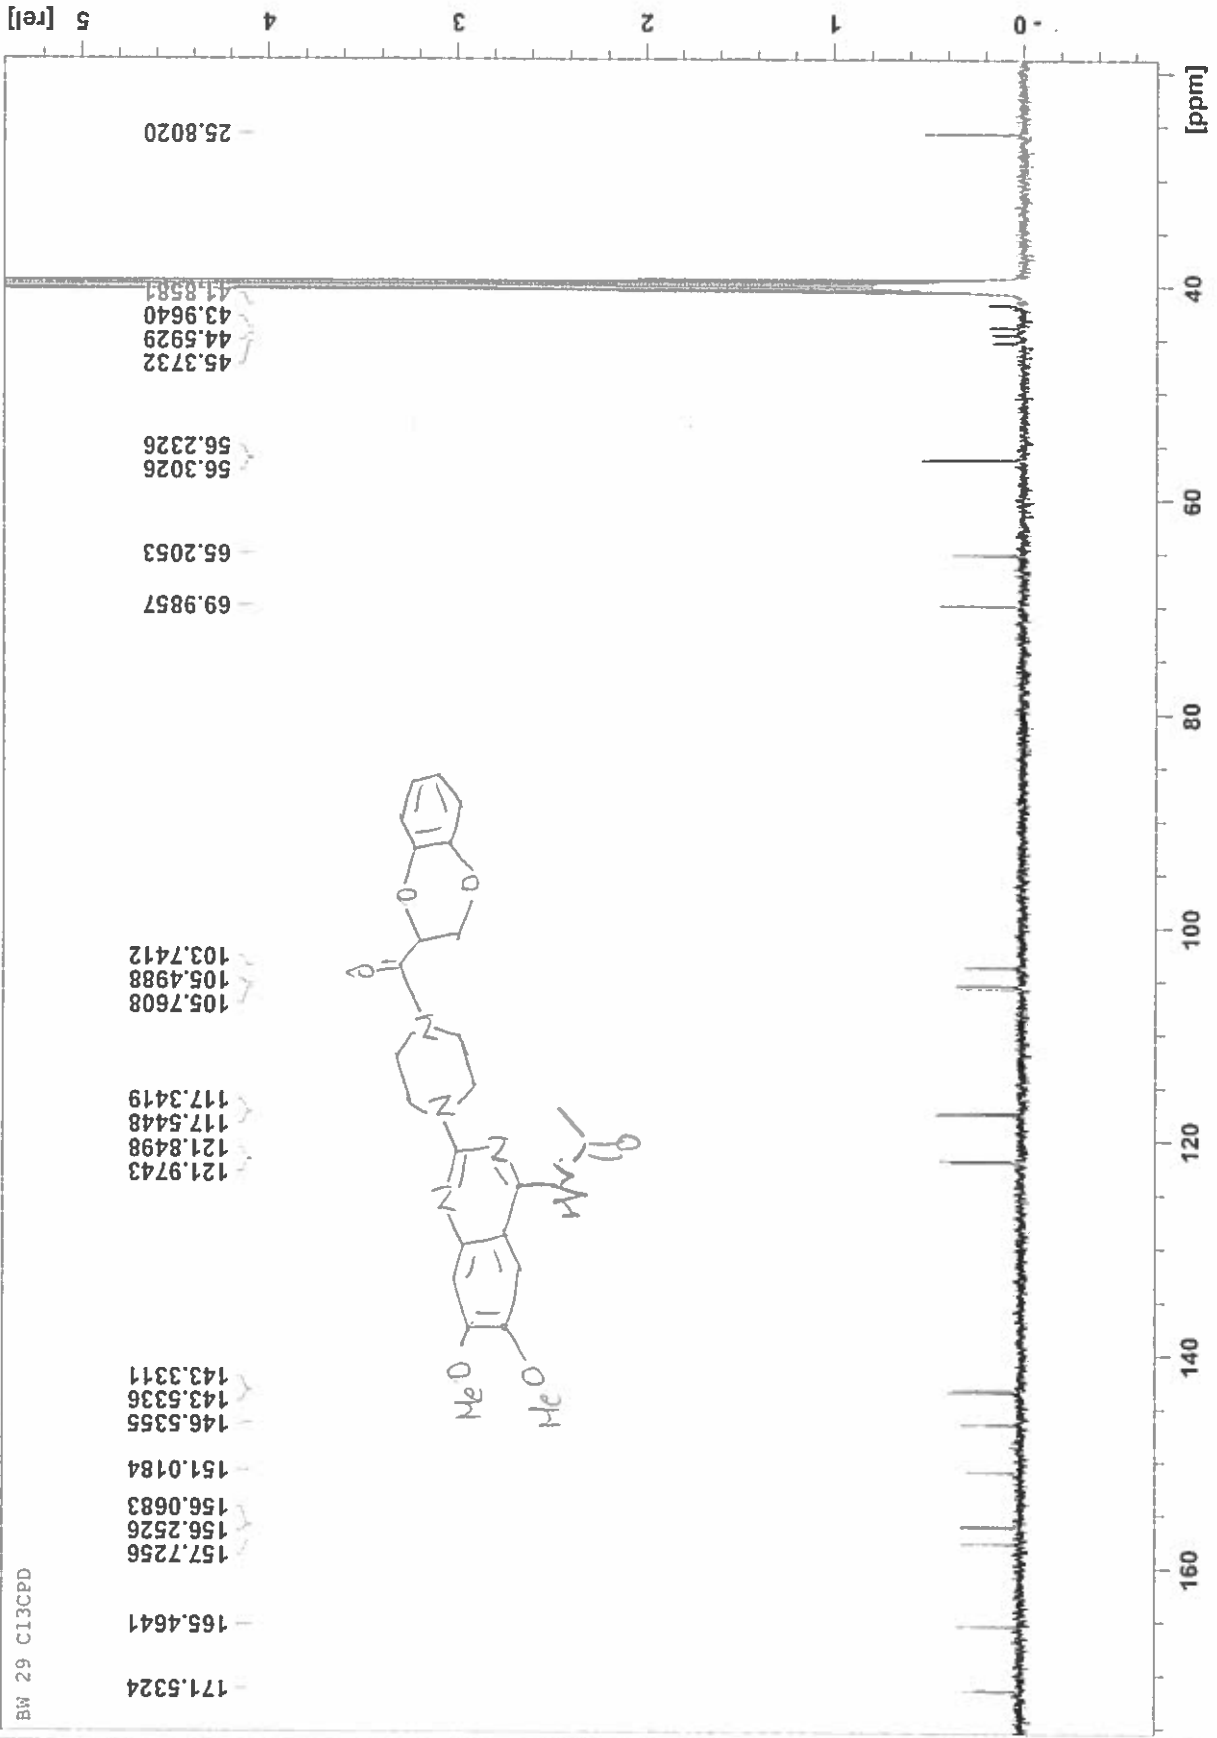

"BW-31 13C NMR" 1 1 "C:\Bruker\TopSpin3.2\viharika\bw compounds"

BW-31 13C NMR

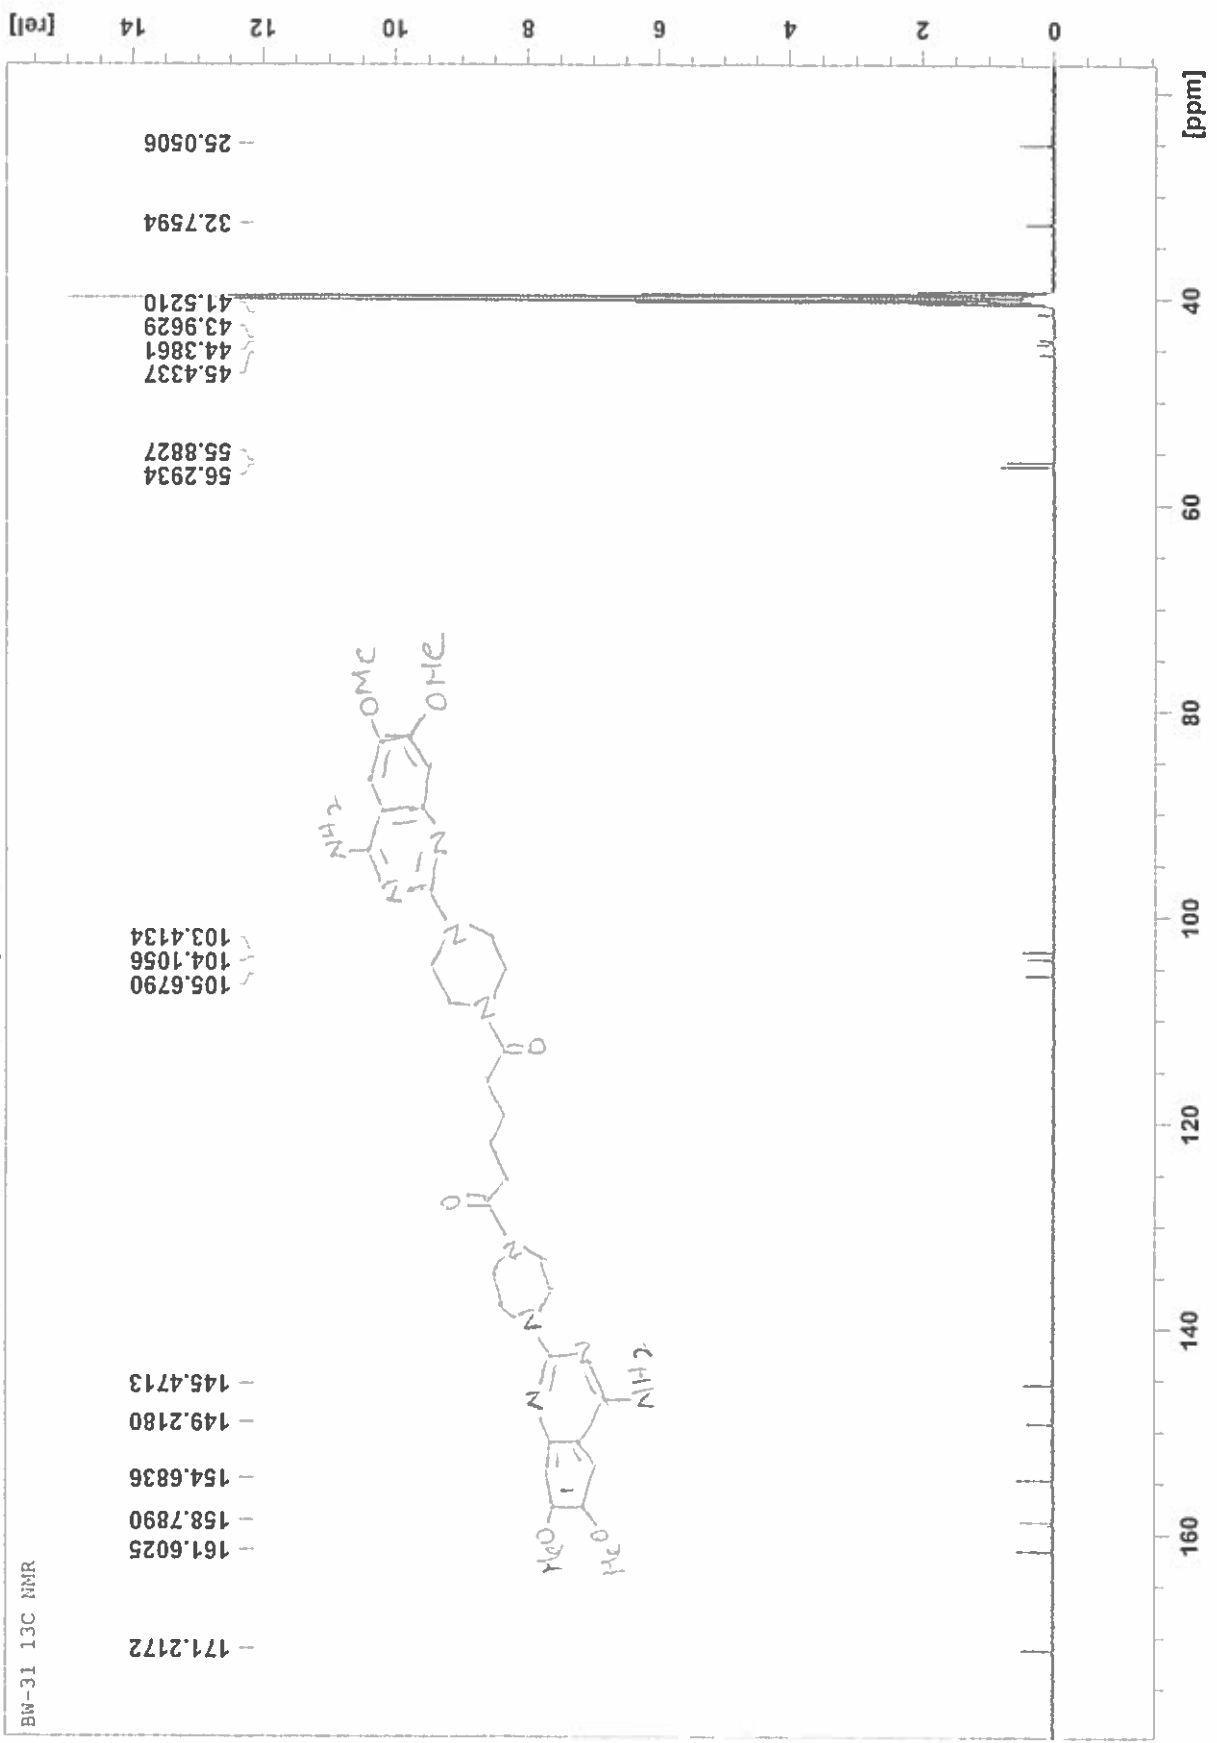

"BW-34 13C NMR" 3 3 "C:\Bruker\TopSpin3.2\vihariika\bw compounds"

BW-34 13C NMR

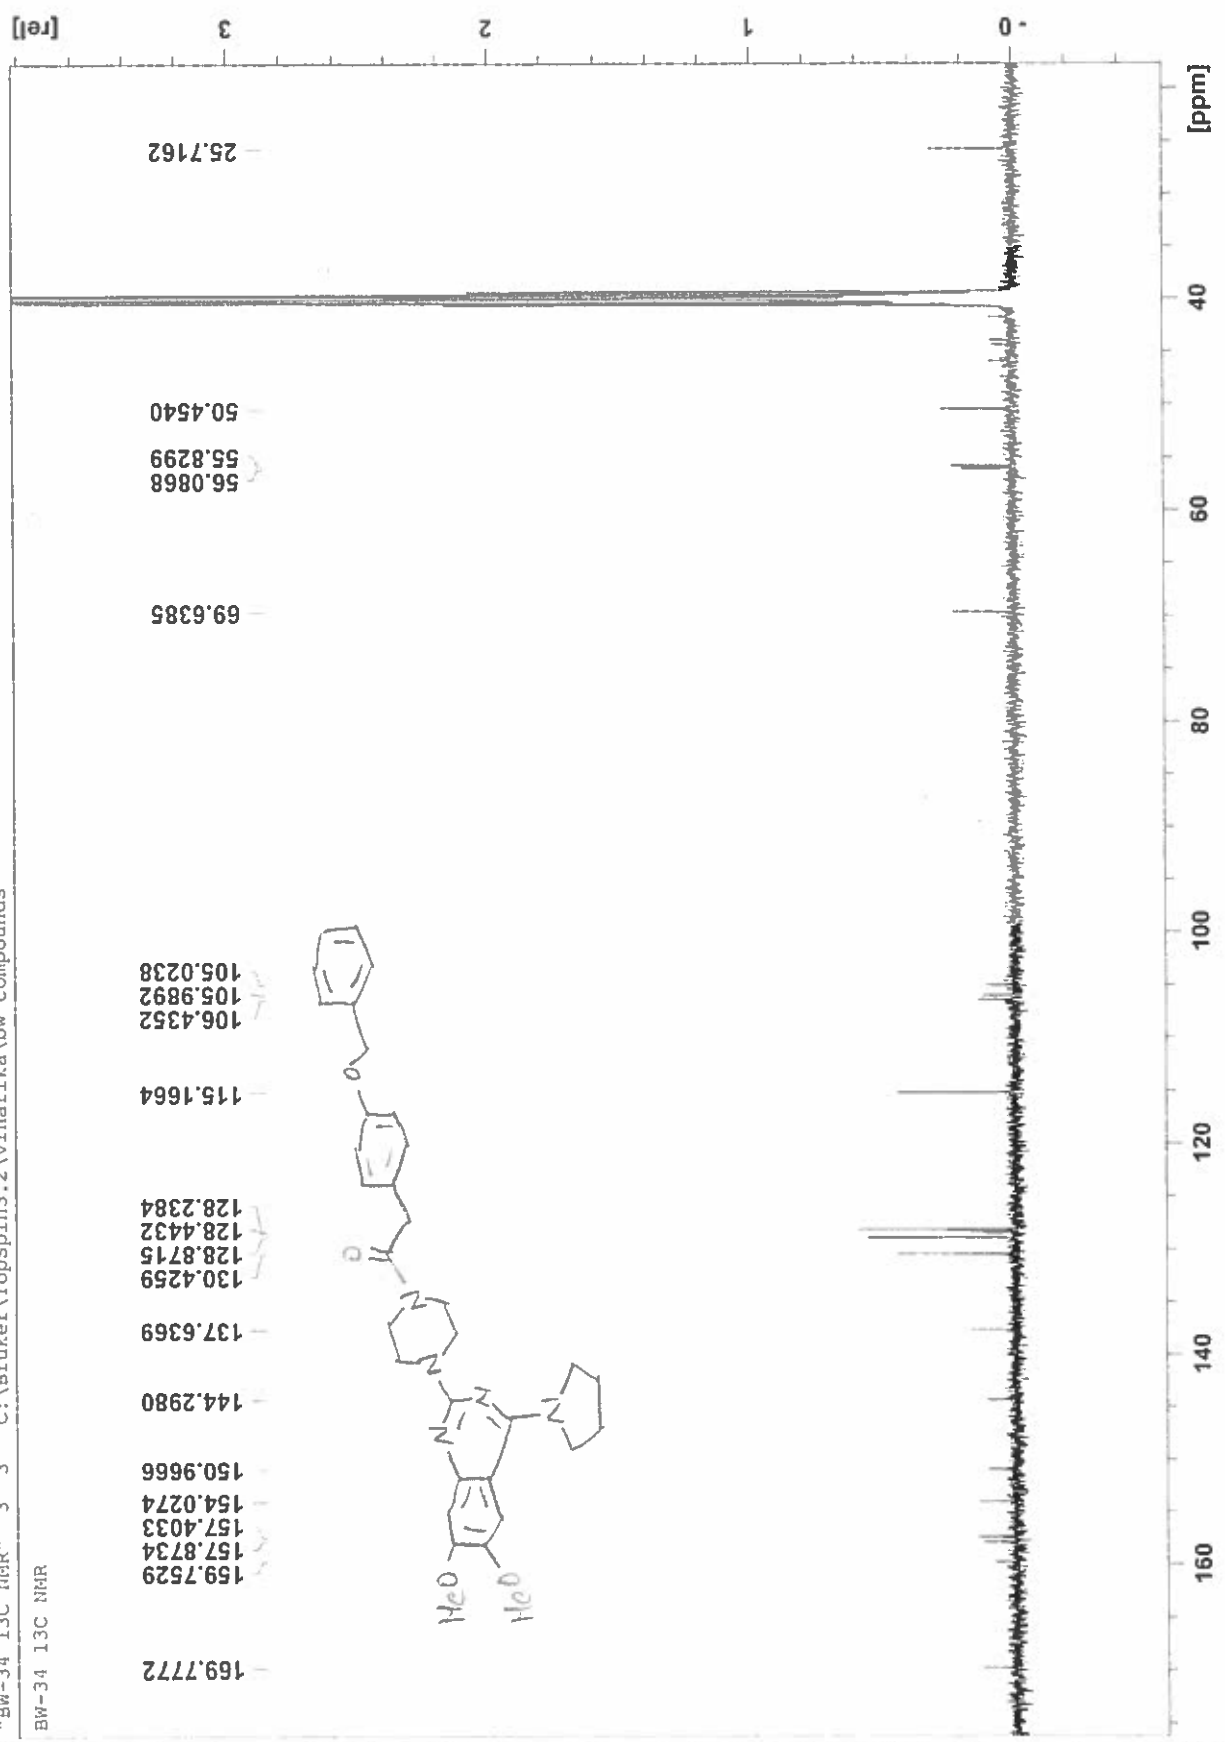

No Name #1 13C NMR 1 1 "C:\Bruker\TopSpin3.2\viharika\bw compounds"

No Name #1 13C NMR

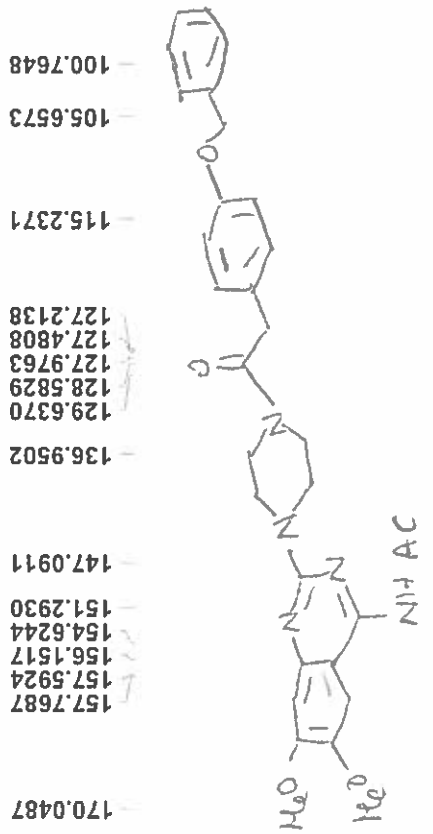

170.0487

157.7687  
157.5924  
156.1517  
154.6244  
151.2930

147.0911

136.9502

129.6370  
128.5829  
127.9763  
127.4808  
127.2138

115.2371

105.6573

100.7648

70.0842

56.3062  
56.2343

45.9680  
44.1790  
44.0264  
41.7152  
40.2842

25.6794

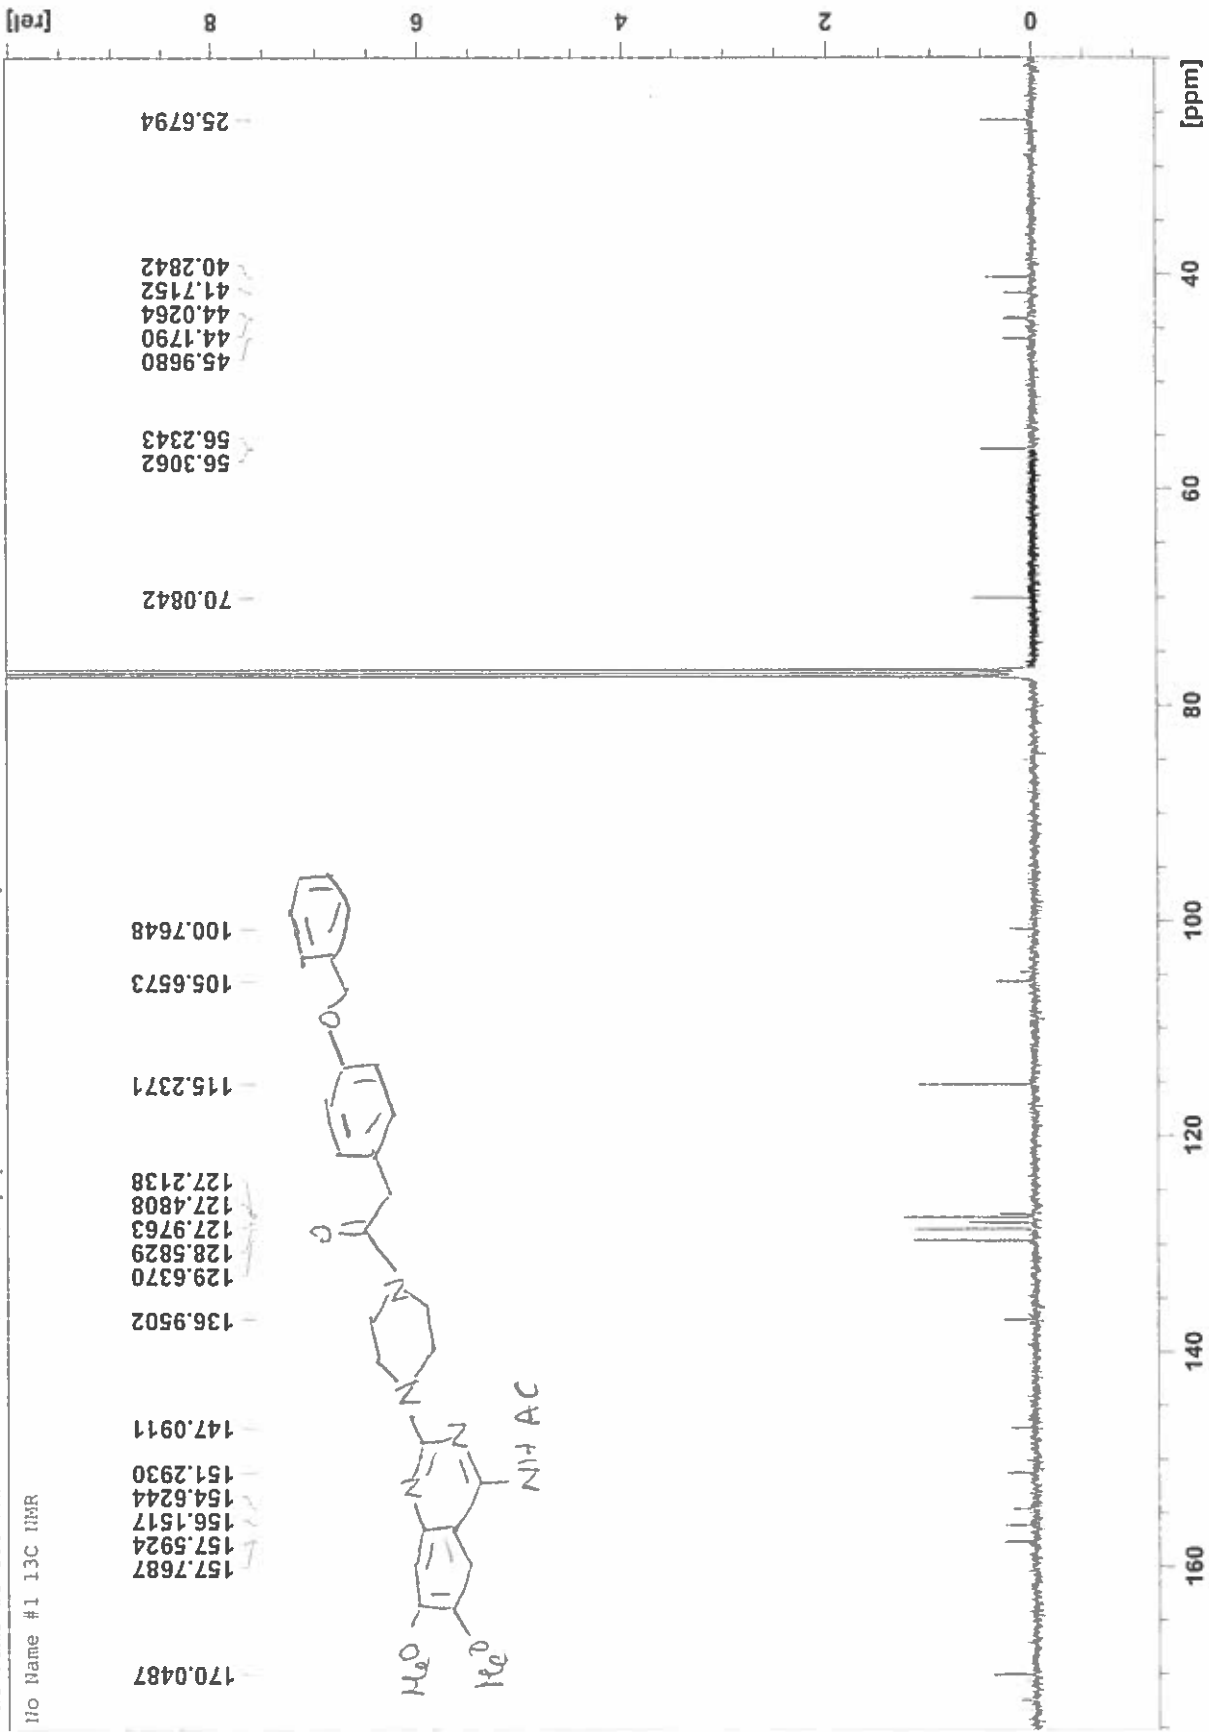

File name #2 13C NMR\* 1 1 "C:\Bruker\TopSpin3.2\viharika\bw compounds"

No name #2 13C NMR

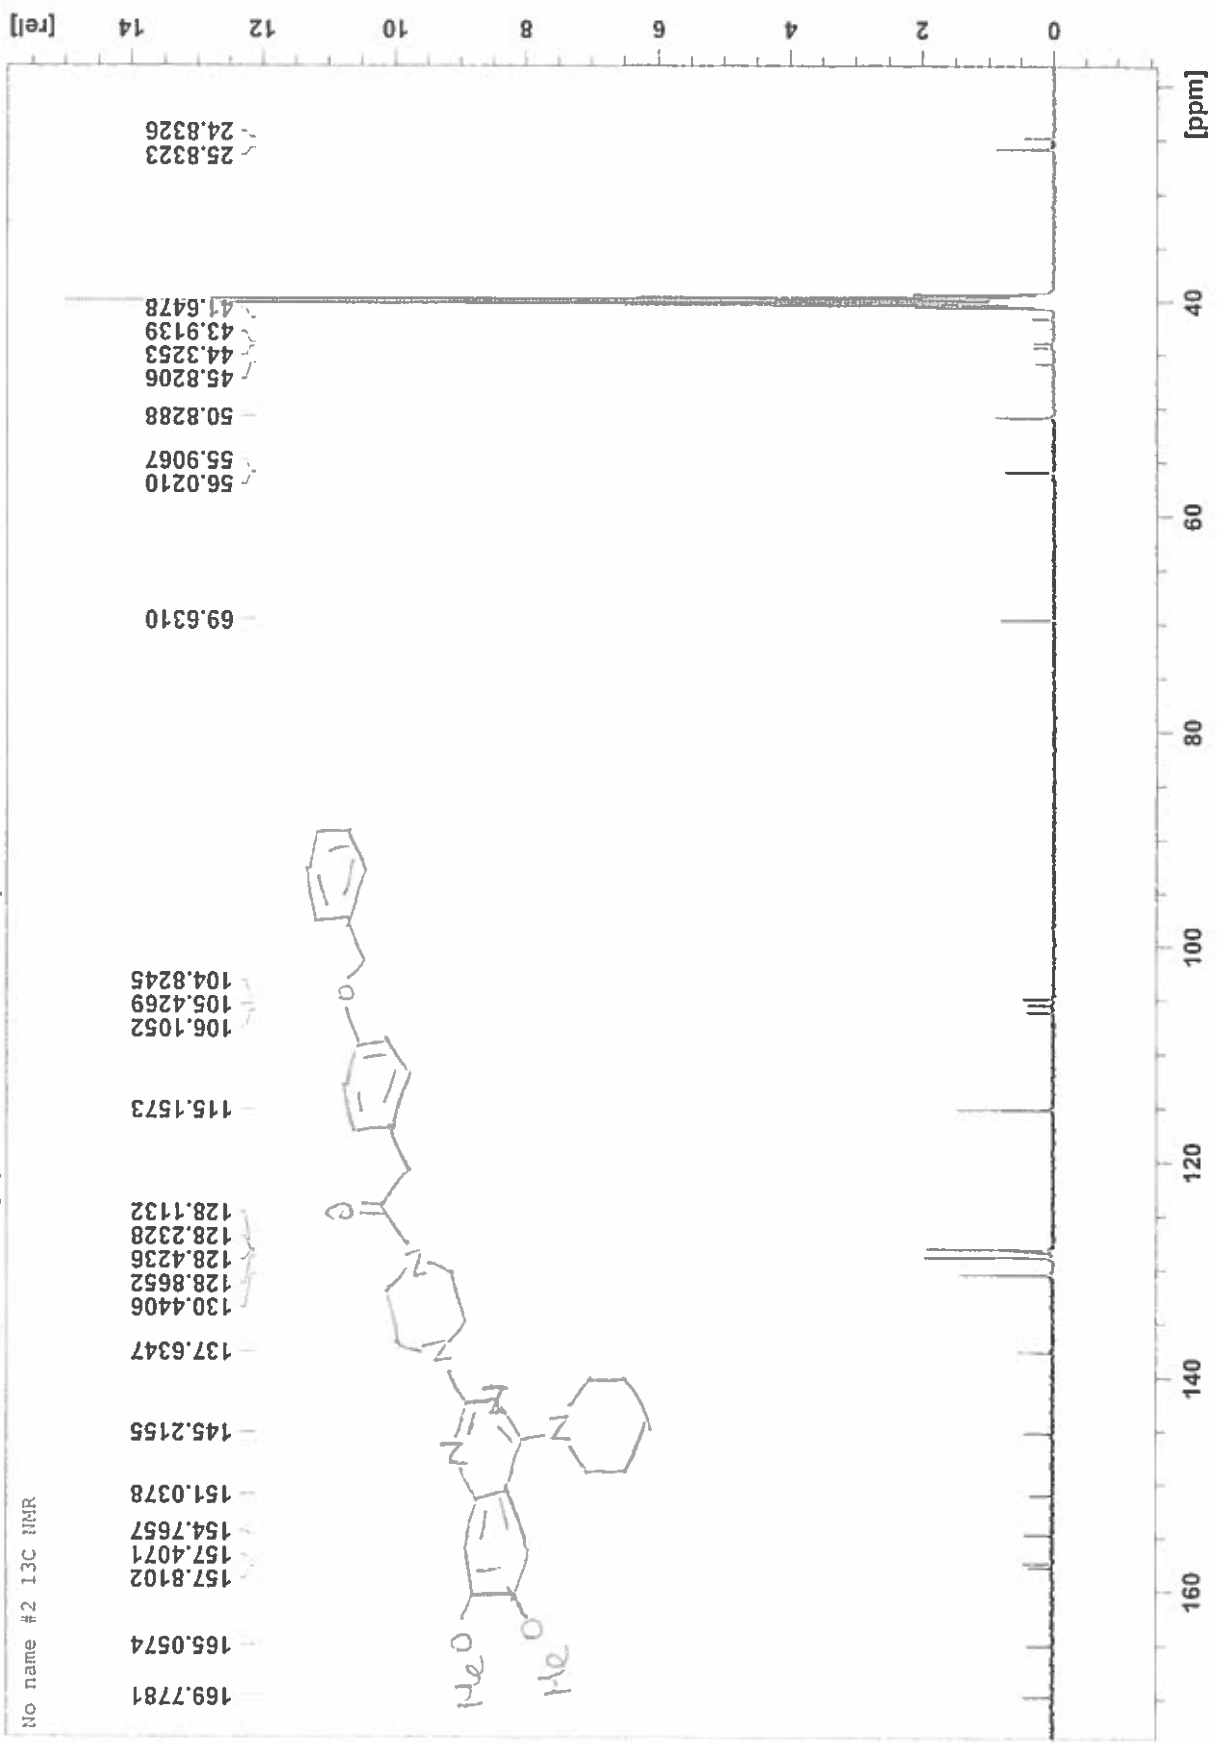



"No name #3 13C NMR" 1 1 "C:\Bruker\TopSpin3.2\viharika\bw compounds"

No name #3 13C NMR

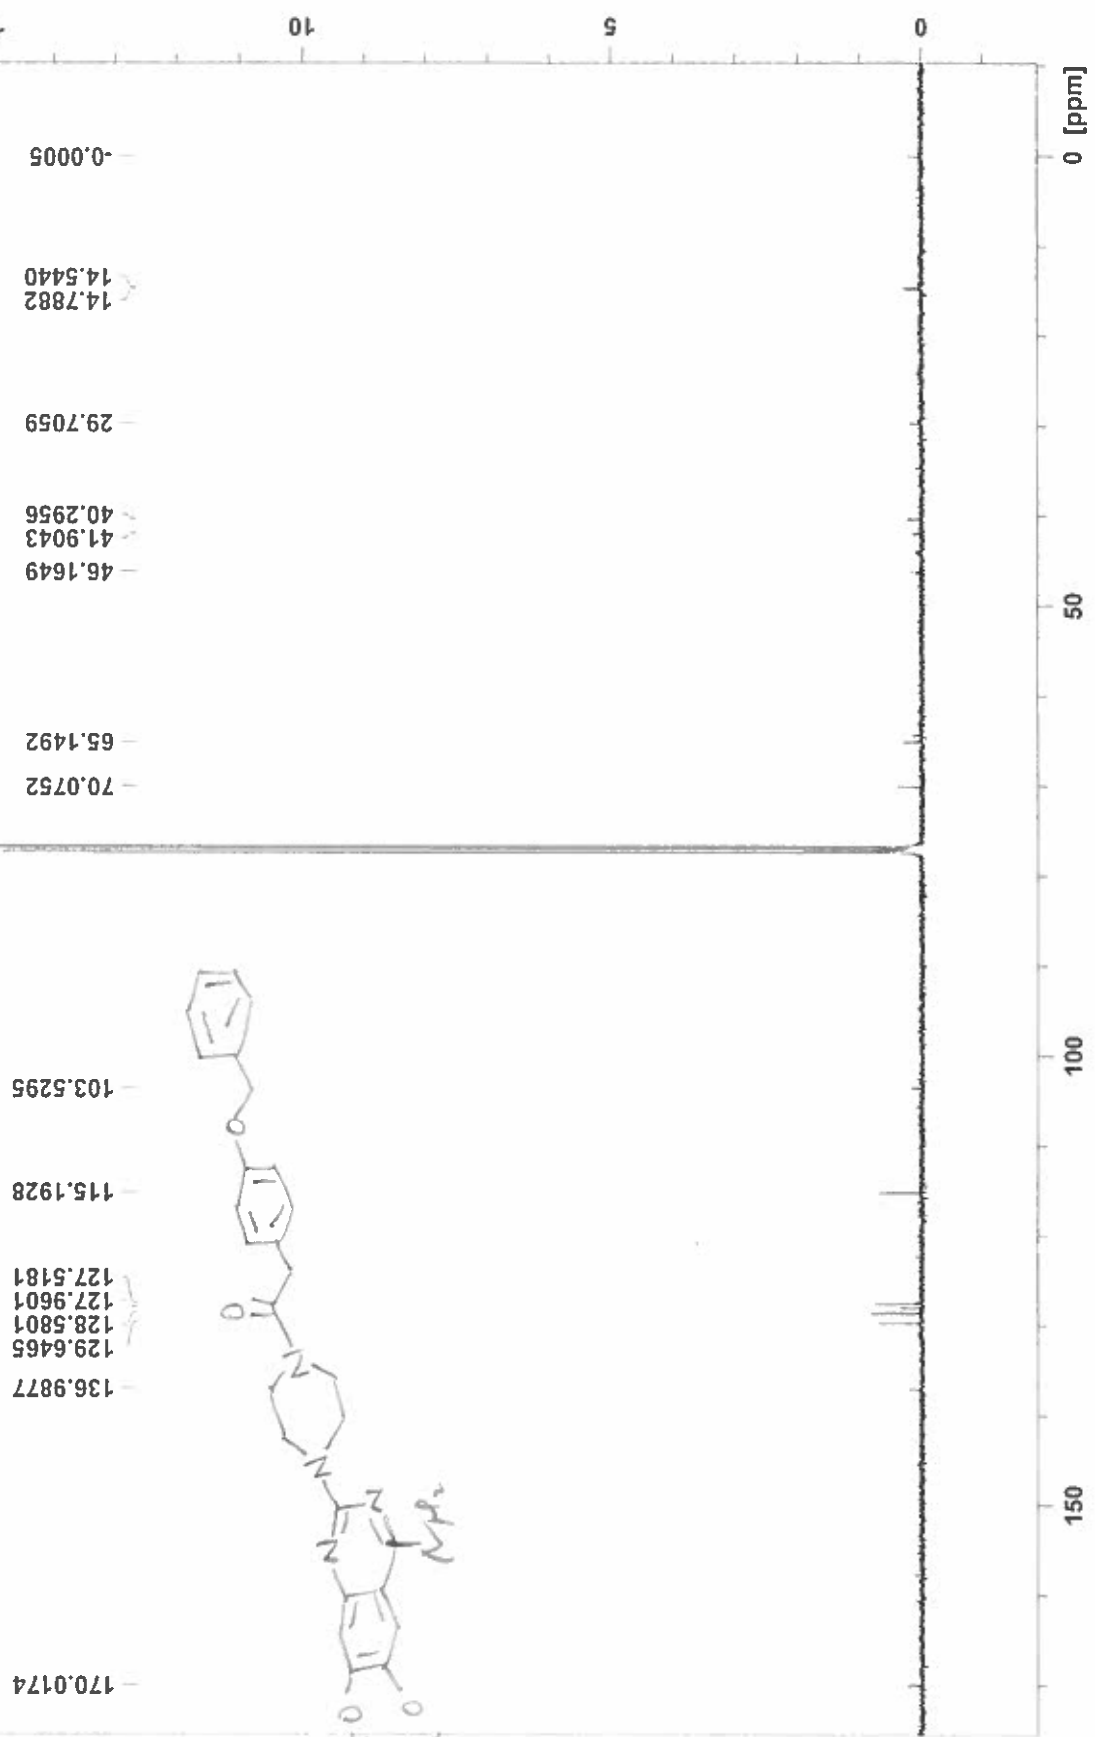

Supplement: NIHMS919117-supplement.pdf [file NIHMS919117-supplement.pdf]
